# Supplementary material for: Highly enantioselective intramolecular Michael reactions by d-camphor-derived triazolium salts
Source: Royal Society of Chemistry journal article supplement (doi:10.1039/b914805a), 2009-01-01
Supplement: b914805a.pdf [file b914805a.pdf]

*Supporting information for*  
**Highly Enantioselective Intramolecular Michael Reactions by  
D-Camphor-Derived Triazolium Salts**

Yi Li, Xue-Qiang Wang, Chao Zheng and Shu-Li You\*

State Key Laboratory of Organometallic Chemistry, Shanghai Institute of Organic Chemistry,  
Chinese Academy of Sciences, 345 Linling Lu, Shanghai 200032 (China), Fax: (+86)  
21-54925087  
E-mail: [slyou@mail.sioc.ac.cn](mailto:slyou@mail.sioc.ac.cn)

**General Considerations**

All reactions utilizing air-sensitive reagents were carried out in flame-dried glassware under a dry argon atmosphere. All solvents were purified and dried according to standard methods prior to use. <sup>1</sup>H NMR spectra were recorded on a VARIAN Mercury 300 MHz spectrometer in chloroform-d. Chemical shifts are reported in ppm with the internal TMS signal at 0.0 ppm as a standard. The data is being reported as [s = singlet, d = doublet, t = triplet, m = multiplet or unresolved, brs = broad singlet, coupling constant (s) in Hz, integration]. <sup>13</sup>C NMR spectra were recorded on a VARIAN Mercury 75 MHz spectrometer in chloroform-d. Chemical shifts are reported in ppm with the internal chloroform signal at 77.0 ppm as a standard. Catalysts **A-E** were prepared according to the known methods<sup>[1]</sup>. All the aldehydes were prepared according to the known methods<sup>[2]</sup>.

### General Procedure for Intramolecular Michael Reaction

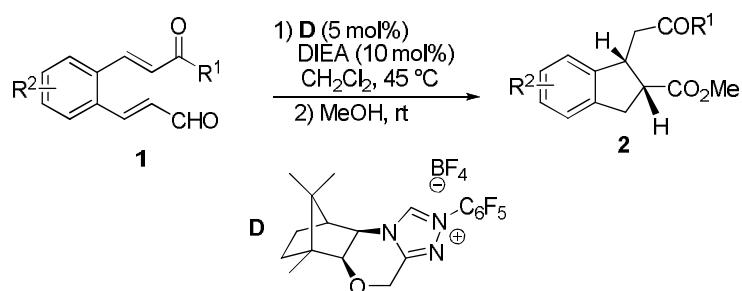

A flame dried Schlenk tube was cooled to room temperature and filled with argon. To this flask were added triazolium salt **D** (2.1 mg, 0.005 mmol, 5 mol%), DIEA (2  $\mu$ L, 0.010 mmol, 10 mol%), CH<sub>2</sub>Cl<sub>2</sub> (2 mL). The mixture was stirred for 0.5h at room temperature, then enal **1** (0.1 mmol) was added and the mixture was refluxed at 45°C. After the reaction was complete (the disappearance of the enal **1**, monitored by TLC), methanol (5 mL) was added and the reaction mixture was stirred at room temperature overnight. The mixture was concentrated under reduced pressure, and then purified by silica-gel column chromatography (hexane/EtOAc) to afford annulation product.

## Spectra Data for Compounds 1 and 2

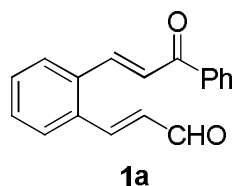

### (E)-3-(2-((E)-3-oxo-3-phenylprop-1-enyl)phenyl)acrylaldehyde

**1a**<sup>[2]</sup>: <sup>1</sup>H NMR (300 MHz, CDCl<sub>3</sub>) δ 6.69 (dd, *J* = 7.5, 15.9 Hz, 1 H), 7.49 -7.56 (m, 5H), 7.60-7.78 (m, 2 H), 7.96 (d, *J* = 15.9 Hz, 1 H), 8.04-8.07 (m, 2 H), 8.21 (d, *J* = 15.3 Hz, 1 H), 9.78 (d, *J* = 8.1 Hz, 1 H).

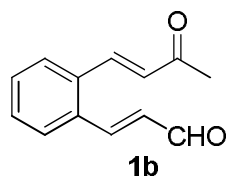

### (E)-3-(2-((E)-3-oxobut-1-enyl)phenyl)acrylaldehyde

**1b**<sup>[2]</sup>: <sup>1</sup>H NMR (300 MHz, CDCl<sub>3</sub>) δ 2.43 (s, 3 H), 6.67 (d, *J* = 16.2 Hz, 1 H), 6.68 (d, *J* = 16.2 Hz, 1 H), 7.46-7.49 (m, 2 H), 7.62-7.67 (m, 2 H), 7.88 (d, *J* = 15.9 Hz, 1 H), 7.91 (d, *J* = 15.6 Hz, 1 H), 9.78 (d, *J* = 7.8 Hz, 1 H).

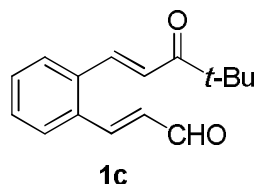

### (E)-3-(2-((E)-4,4-dimethyl-3-oxopent-1-enyl)phenyl)acrylaldehyde

**1c**: <sup>1</sup>H NMR (300 MHz, CDCl<sub>3</sub>) δ 1.13 (s, 9 H), 6.51 (dd, *J* = 7.2, 15.9 Hz, 1 H), 6.97 (d, *J* = 15.3 Hz, 1 H), 7.31-7.35 (m, 2 H), 7.49-7.56 (m, 2 H), 7.76 (d, *J* = 15.6 Hz, 1 H), 7.92 (d, *J* = 15.3 Hz, 1 H), 9.60 (d, *J* = 7.2 Hz, 1 H); <sup>13</sup>C NMR (75 MHz, CDCl<sub>3</sub>) δ 25.8, 42.9, 124.6, 127.2, 127.5, 129.8, 130.6, 130.7, 133.4, 134.8, 138.4, 148.6, 193.0, 203.2; IR (KBr): ν<sub>max</sub> (cm<sup>-1</sup>) = 2968, 1686, 1606, 1477, 1324, 1125, 1075, 974, 761; MS (ESI, *m/z*) 265.3 (M+Na<sup>+</sup>); Anal. calcd for C<sub>16</sub>H<sub>18</sub>O<sub>2</sub>: C, 79.31; H, 7.49; Found: C, 79.37; H, 7.38.

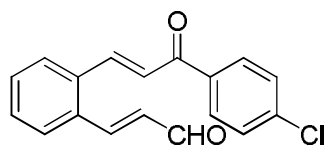

**1d**

**(E)-3-(2-((E)-3-(4-chlorophenyl)-3-oxoprop-1-enyl)phenyl)acrylaldehyde**

**1d:**  $^1\text{H}$  NMR (300 MHz,  $\text{CDCl}_3$ )  $\delta$  6.69 (dd,  $J = 8.1, 15.6$  Hz, 1 H), 7.44-7.52 (m, 5 H), 7.66-7.77 (m, 2 H), 7.92-8.01 (m, 3 H), 8.23 (d,  $J = 15.9$  Hz, 1 H), 9.78 (d,  $J = 8.1$  Hz, 1 H);  $^{13}\text{C}$  NMR (75 MHz,  $\text{CDCl}_3$ )  $\delta$  124.7, 127.5, 127.6, 128.8, 129.7, 130.4, 130.8, 131.1, 133.8, 134.5, 135.7, 139.4, 140.7, 148.4, 187.8, 193.2; IR (KBr):  $\nu_{\text{max}}$  ( $\text{cm}^{-1}$ ) = 1671, 1598, 1483, 1286, 1219, 1157, 1122, 1034, 964, 865, 691; MS (ESI,  $m/z$ ) 319.7 ( $\text{M}+\text{Na}^+$ ); Anal. calcd for  $\text{C}_{18}\text{H}_{13}\text{ClO}_2$ : C, 72.85; H, 4.42; Found: C, 72.76; H, 4.41.

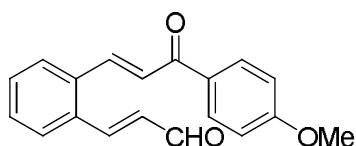

**1e**

**(E)-3-(2-((E)-3-(4-methoxyphenyl)-3-oxoprop-1-enyl)phenyl)acrylaldehyde**

**1e**<sup>[2]</sup>:  $^1\text{H}$  NMR (300 MHz,  $\text{CDCl}_3$ )  $\delta$  3.87 (s, 3 H), 6.65 (dd,  $J = 8.1, 15.6$  Hz, 1 H), 6.97 (d,  $J = 8.4$  Hz, 2 H), 7.44-7.52 (m, 3 H), 7.62-7.65 (m, 1 H), 7.72-7.75 (m, 1 H), 7.93 (d,  $J = 15.6$  Hz, 1 H), 8.05 (d,  $J = 8.1$  Hz, 2 H), 8.15 (d,  $J = 15.3$  Hz, 1H), 9.74 (d,  $J = 7.8$  Hz, 1 H).

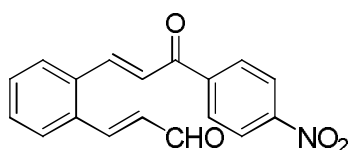

**1f**

**(E)-3-(2-((E)-3-(4-nitrophenyl)-3-oxoprop-1-enyl)phenyl)acrylaldehyde**

**1f:**  $^1\text{H}$  NMR (300 MHz,  $\text{CDCl}_3$ )  $\delta$  6.70 (dd,  $J = 7.5, 15.6$  Hz, 1 H), 7.46-7.55 (m, 3 H), 7.68-7.80 (m, 2 H), 7.94 (d,  $J = 16.2$  Hz, 1 H), 8.18-8.40 (m, 5 H), 9.79 (d,  $J = 7.8$  Hz, 1 H);  $^{13}\text{C}$  NMR (75 MHz,  $\text{CDCl}_3$ )  $\delta$  123.8, 124.0, 124.6, 127.9, 128.0, 129.3, 129.5, 131.1, 131.1, 131.9, 134.4, 134.4, 142.4, 142.5, 188.0, 193.2; IR (KBr):  $\nu_{\text{max}}$  ( $\text{cm}^{-1}$ ) = 1674, 1586, 1517, 1345, 1212, 1122, 970, 755; MS (ESI,  $m/z$ ) 330.9 ( $\text{M}+\text{Na}^+$ ); HRMS (EI) calcd for  $\text{C}_{18}\text{H}_{13}\text{NO}_4$  ( $\text{M}^+$ ): 307.0845; Found: 307.0847.

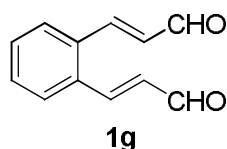

**(2E,2'E)-3,3'-(1,2-phenylene)-bis-2-propenal**

**1g**<sup>[2]</sup>: <sup>1</sup>H NMR (300 MHz, CDCl<sub>3</sub>) δ 6.69 (dd, *J* = 7.5, 15.9 Hz, 2 H), 7.50-7.53 (m, 2 H), 7.66-7.69 (m, 2 H), 7.89 (d, *J* = 15.9 Hz, 2 H), 9.80 (d, *J* = 7.8 Hz, 2 H).

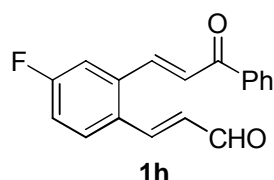

**(E)-3-(4-fluoro-2-((E)-3-oxo-3-phenylprop-1-enyl)phenyl)acrylaldehyde**

**1h**<sup>[2]</sup>: <sup>1</sup>H NMR (300 MHz, CDCl<sub>3</sub>) δ 6.50 (dd, *J* = 7.5, 15.9 Hz, 1 H), 7.11-7.18 (m, 1 H), 7.43-7.64 (m, 6 H), 7.84 (d, *J* = 15.6 Hz, 1 H), 8.04 (d, *J* = 7.8 Hz, 2 H), 8.11 (d, *J* = 15.6 Hz, 1 H), 9.70 (d, *J* = 7.8 Hz, 1 H).

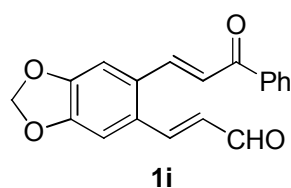

**(E)-3-(6-((E)-3-oxo-3-phenylprop-1-enyl)benzo[d][1,3]dioxol-5-yl)acrylaldehyde**

**1i**: <sup>1</sup>H NMR (300 MHz, CDCl<sub>3</sub>) δ 6.10 (s, 2 H), 6.57 (dd, *J* = 7.8, 15.6 Hz, 1 H), 7.12 (s, 1 H), 7.23 (s, 1 H), 7.41 (d, *J* = 15.3 Hz, 1 H), 7.51-7.65 (m, 3 H), 7.94 (d, *J* = 15.6 Hz, 1 H), 8.08 (d, *J* = 8.7 Hz, 2 H), 8.20 (d, *J* = 15.3 Hz, 1 H), 9.75 (d, *J* = 7.8 Hz, 1 H); <sup>13</sup>C NMR (75 MHz, CDCl<sub>3</sub>) δ 77.2, 102.3, 106.4, 106.6, 123.9, 128.5, 128.7, 129.3, 129.7, 130.6, 133.1, 137.8, 139.7, 147.9, 150.1, 150.5, 189.5, 193.4; IR (KBr):  $\nu_{\max}$  (cm<sup>-1</sup>) = 3055, 1715, 1599, 1587, 1296, 1269, 1220, 1158, 1123, 1035, 1018, 964, 923, 777, 691; MS (ESI, *m/z*) 329.5 (M+Na<sup>+</sup>); HRMS (EI) calcd for C<sub>19</sub>H<sub>14</sub>O<sub>4</sub> (M<sup>+</sup>): 306.0892; Found: 306.0897.

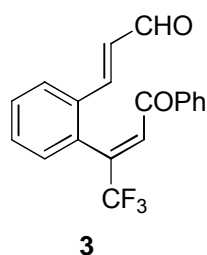

**(E)-3-(2-((E)-1,1,1-trifluoro-4-oxo-4-phenylbut-2-en-2-yl)phenyl)acrylaldehyde**

**3**:  $^1\text{H}$  NMR (300 MHz,  $\text{CDCl}_3$ )  $\delta$  6.62 (q,  $J = 7.8$  Hz, 1 H), 7.27 (d,  $J = 7.2$  Hz, 1 H), 7.40-7.61 (m, 6 H), 7.67-7.68 (m, 2 H), 7.83 (d,  $J = 7.2$  Hz, 2 H), 9.59 (d,  $J = 7.8$  Hz, 1 H);  $^{13}\text{C}$  NMR (75 MHz,  $\text{CDCl}_3$ )  $\delta$  120.5, 124.2, 126.6, 128.6, 128.9, 129.8, 129.9, 130.2, 130.5, 131.3, 131.9, 132.0, 133.7, 134.3, 135.9, 137.4, 137.9, 149.3, 189.7, 193.4; IR (KBr):  $\nu_{\text{max}}$  ( $\text{cm}^{-1}$ ) = 1680, 1596, 1449, 1279, 1180, 1126, 969, 763, 627; MS (ESI,  $m/z$ ) 353.2 ( $\text{M}+\text{Na}^+$ ); Anal. calcd for  $\text{C}_{19}\text{H}_{13}\text{F}_3\text{O}_2$ : C, 69.09; H, 3.97; Found: C, 69.08; H, 4.08.

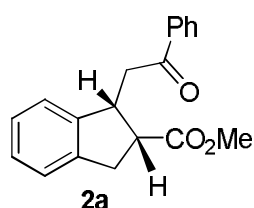

**(1R,2R)-methyl 1-(2-oxo-2-phenylethyl)-2,3-dihydro-1H-indene-2-carboxylate**

**2a**<sup>[3]</sup>: Yield 99%, ee 99%.  $[\alpha]_{\text{D}}^{20} = +35.4^\circ$  ( $c = 1.43$ ,  $\text{CHCl}_3$ ).  $^1\text{H}$  NMR (300 MHz,  $\text{CDCl}_3$ )  $\delta$  3.06-3.17 (m, 2 H), 3.33-3.46 (m, 2 H), 3.55 (s, 3 H), 3.55-3.63 (m, 1 H), 4.26 (q,  $J = 8.1$  Hz, 1 H), 7.15-7.26 (m, 4 H), 7.41-7.47 (m, 2 H), 7.52-7.57 (m, 1 H), 7.92 (d,  $J = 7.2$  Hz, 2 H).

[Daicel Chiralpak AD-H, hexanes/2-propanol = 85/15,  $v = 1.0$  mL/min<sup>-1</sup>,  $\lambda = 254$  nm,  $t_1$  (major) = 8.462 min,  $t_2$  (minor) = 10.042 min ].

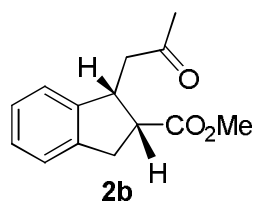

**(1R,2R)-methyl 1-(2-oxopropyl)-2,3-dihydro-1H-indene-2-carboxylate**

**2b**<sup>[3]</sup>: Yield 93%, ee 95%.  $[\alpha]_{\text{D}}^{20} = +13.5^\circ$  ( $c = 0.60$ ,  $\text{CHCl}_3$ ).  $^1\text{H}$  NMR (300 MHz,  $\text{CDCl}_3$ )  $\delta$  2.12 (s, 3 H), 2.60 (dd,  $J = 6.0, 17.4$  Hz, 1 H), 2.85 (dd,  $J = 8.1, 18.0$  Hz, 1 H), 3.05 (dd,  $J = 8.1, 15.9$  Hz, 1 H), 3.29 (dd,  $J = 8.7, 15.6$  Hz, 1 H), 3.48 (q,  $J = 8.4$  Hz, 1 H), 3.67 (s, 3 H), 4.01 (q,  $J = 8.1$  Hz, 1 H), 7.14-7.24 (m, 4 H).

[Daicel Chiralpak AD-H, hexanes/2-propanol = 90/10,  $v = 0.7$  mL/min<sup>-1</sup>,  $\lambda = 214$  nm,  $t_1$  (minor) = 8.653 min,  $t_2$  (major) = 9.333 min].

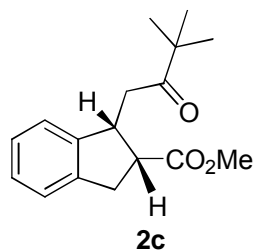

**(1R,2R)-methyl-(3,3-dimethyl-2-oxobutyl)-2,3-dihydro-1H-indene-2-carboxylate**

**2c:** Yield 85%, ee 99%.  $[\alpha]_D^{20} = +22.5^\circ$  ( $c = 1.35$ ,  $\text{CHCl}_3$ ).  $^1\text{H}$  NMR (300 MHz,  $\text{CDCl}_3$ )  $\delta$  1.07 (s, 9 H), 2.72 (dd,  $J = 6.0, 18.0$  Hz, 1 H), 2.85 (dd,  $J = 7.5, 18.0$  Hz, 1 H), 3.05 (dd,  $J = 8.1, 15.9$  Hz, 1 H), 3.29 (dd,  $J = 8.4, 15.9$  Hz, 1 H), 3.50 (q,  $J = 8.1$  Hz, 1 H), 3.65 (s, 3 H), 4.00 (q,  $J = 7.2$  Hz, 1 H), 7.09 -7.26 (m, 4 H);  $^{13}\text{C}$  NMR (75 MHz,  $\text{CDCl}_3$ )  $\delta$  26.5, 34.4, 38.6, 41.9, 44.0, 47.3, 51.6, 124.0, 124.4, 126.7, 127.1, 141.1, 144.9, 174.4, 214.4; IR (KBr):  $\nu_{\text{max}}$  ( $\text{cm}^{-1}$ ) = 2959, 2928, 2858, 1727, 1460, 1278, 1190, 1146, 936, 751, 665; MS (ESI,  $m/z$ ) 297.4 ( $\text{M}+\text{Na}^+$ ); HRMS (EI) calcd for  $\text{C}_{17}\text{H}_{22}\text{O}_3$  ( $\text{M}^+$ ): 274.1596; Found: 274.1565.

[Daicel Chiralpak AD-H, hexanes/2-propanol = 90/10,  $v = 0.7$  mL/min $^{-1}$ ,  $\lambda = 214$  nm,  $t_1$  (major) = 6.832 min,  $t_2$  (minor) = 7.583 min].

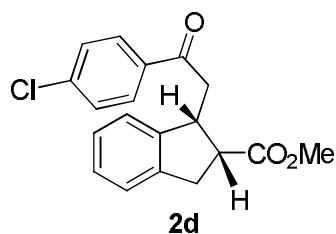

**(1R,2R)-methyl-1-(2-(4-chlorophenyl)-2-oxoethyl)-2,3-dihydro-1H-indene-2-carboxylate**

**2d:** Yield 85%, ee 99%.  $[\alpha]_D^{20} = +14.0^\circ$  ( $c = 1.20$ ,  $\text{CHCl}_3$ ).  $^1\text{H}$  NMR (300 MHz,  $\text{CDCl}_3$ )  $\delta$  3.04-3.14 (m, 2 H), 3.32-3.44 (m, 2 H), 3.54 (s, 3 H), 3.54-3.62 (m, 1 H), 4.23 (q,  $J = 7.8$  Hz, 1 H), 7.15-7.26 (m, 4 H), 7.41 (d,  $J = 8.4$  Hz, 2 H), 7.86 (d,  $J = 8.7$  Hz, 2 H);  $^{13}\text{C}$  NMR (75 MHz,  $\text{CDCl}_3$ )  $\delta$  34.4, 40.5, 42.4, 47.3, 51.7, 124.0, 124.6, 126.8, 127.3, 128.9, 129.4, 135.2, 139.5, 141.2, 144.4, 174.5, 197.3; IR (KBr):  $\nu_{\text{max}}$  ( $\text{cm}^{-1}$ ) = 2951, 1731, 1687, 1589, 1401, 1214, 1169, 1092, 996, 756; MS (ESI,  $m/z$ ) 351.3 ( $\text{M}+\text{Na}^+$ ); HRMS (EI) calcd for  $\text{C}_{19}\text{H}_{17}\text{O}_3\text{Cl}$  ( $\text{M}^+$ ): 328.0866; Found: 328.0863.

[Daicel Chiralpak AD-H, hexanes/2-propanol = 90/10,  $v = 1.0$  mL/min $^{-1}$ ,  $\lambda = 254$  nm,

$t_1$  (major) = 12.140 min,  $t_2$  (minor) = 14.853 min ].

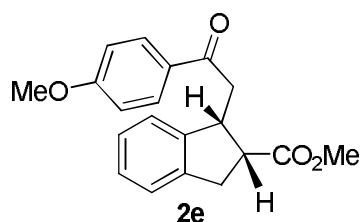

**(1R,2R)-methyl-1-(2-(4-methoxyphenyl)-2-oxoethyl)-2,3-dihydro-1H-indene-2-carboxylate**

**2e**<sup>[31]</sup>: Yield 96%, ee 99%.  $[\alpha]_D^{20} = +29.4^\circ$  (c = 0.70, CHCl<sub>3</sub>). <sup>1</sup>H NMR (300 MHz, CDCl<sub>3</sub>)  $\delta$  3.04-3.13 (m, 2 H), 3.30-3.41 (m, 2 H), 3.55 (s, 3 H), 3.55-3.62 (m, 1 H), 3.85 (s, 3 H), 4.25 (q,  $J = 7.5$  Hz, 1 H), 6.90 (d,  $J = 8.7$  Hz, 2 H), 7.14-7.25 (m, 4 H), 7.90 (d,  $J = 8.7$  Hz, 2 H).

[Daicel Chiralpak AD-H, hexanes/2-propanol = 85/15,  $v = 1.0$  mL/min<sup>-1</sup>,  $\lambda = 254$  nm,

$t_1$  (major) = 13.875 min,  $t_2$  (minor) = 17.723 min ].

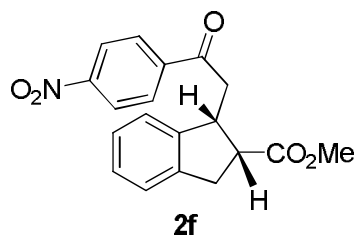

**(1R,2R)-methyl-1-(2-(4-nitrophenyl)-2-oxoethyl)-2,3-dihydro-1H-indene-2-carboxylate**

**2f**: Yield 52%, ee 98%.  $[\alpha]_D^{20} = +11.4^\circ$  (c = 0.75, CHCl<sub>3</sub>). <sup>1</sup>H NMR (300 MHz, CDCl<sub>3</sub>)  $\delta$  3.09-3.17 (m, 2 H), 3.32-3.40 (m, 1H), 3.54-3.63 (m, 2 H), 3.58 (s, 3 H), 4.24 (q,  $J = 7.8$  Hz, 1 H), 7.19-7.28 (m, 4 H), 8.05-8.13 (m, 2 H), 8.28-8.34 (m, 2 H); <sup>13</sup>C NMR (75 MHz, CDCl<sub>3</sub>)  $\delta$  34.5, 41.2, 42.3, 47.1, 51.8, 123.8, 123.9, 124.7, 127.0, 127.5, 129.0, 129.3, 141.2, 141.4, 144.1, 174.5, 197.2; IR (KBr):  $\nu_{\max}$  (cm<sup>-1</sup>) = 2924, 2853, 1726, 1691, 1527, 1345, 1165, 855, 743, 687; MS (EI,  $m/z$ , rel. intensity) 339 (M<sup>+</sup>, 8), 129 (100); HRMS (EI) calcd for C<sub>19</sub>H<sub>17</sub>NO<sub>5</sub> (M<sup>+</sup>): 339.1107; Found: 339.1111.

[Daicel Chiralpak AD-H, hexanes/2-propanol = 90/10,  $v = 0.8$  mL/min<sup>-1</sup>,  $\lambda = 254$  nm,

$t_1$  (major) = 29.535 min,  $t_2$  (minor) = 42.825 min ].



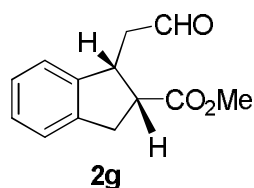

**(1R,2R)-methyl-1-(2-oxoethyl)-2,3-dihydro-1H-indene-2-carboxylate**

**2g**<sup>[3]</sup>: Yield 80%, ee 98%.  $[\alpha]_D^{20} = +14.2^\circ$  ( $c = 0.70$ ,  $\text{CHCl}_3$ ).  $^1\text{H NMR}$  (300 MHz,  $\text{CDCl}_3$ )  $\delta$  2.64 (dd,  $J = 6.0, 18.0$  Hz, 1 H), 2.84 (dd,  $J = 7.5, 18.0$  Hz, 1 H), 3.08 (dd,  $J = 8.4, 15.9$  Hz, 1 H), 3.33 (dd,  $J = 8.4, 15.9$  Hz, 1 H), 3.52 (q,  $J = 7.8$  Hz, 1 H), 3.68 (s, 3 H), 4.06 (q,  $J = 7.8$  Hz, 1 H), 7.17-7.25 (m, 4 H), 9.79 (s, 1 H).

[Daicel Chiralpak AD-H, hexanes/2-propanol = 90/10,  $v = 0.7$  mL/min<sup>-1</sup>,  $\lambda = 214$  nm,  $t_1$  (minor) = 9.617 min,  $t_2$  (major) = 10.337 min].

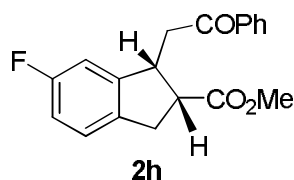

**(1R,2R)-methyl-6-fluoro-1-(2-oxo-2-phenylethyl)-2,3-dihydro-1H-indene-2-carboxylate**

**2h**<sup>[3]</sup>: Yield 71%, ee 98%.  $[\alpha]_D^{20} = +29.1^\circ$  ( $c = 0.70$ ,  $\text{CHCl}_3$ ).  $^1\text{H NMR}$  (300 MHz,  $\text{CDCl}_3$ )  $\delta$  3.02-3.17 (m, 2 H), 3.26-3.44 (m, 2 H), 3.56 (s, 3 H), 3.57-3.67 (m, 1 H), 4.23 (m, 1 H), 6.85-6.93 (m, 2 H), 7.14-7.19 (m, 1 H), 7.43-7.48 (m, 2 H), 7.53-7.59 (m, 1 H), 7.92-7.94 (m, 2 H).

[Daicel Chiralcel OD-H, hexanes/2-propanol/EtOH = 95/2.5/2.5,  $v = 0.8$  mL/min<sup>-1</sup>,  $\lambda = 254$  nm,  $t_1$  (major) = 10.910 min,  $t_2$  (minor) = 11.680 min].

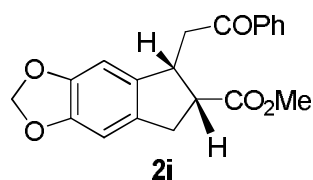

**(5R,6R)-methyl-5-(2-oxo-2-phenylethyl)-6,7-dihydro-5H-indeno[5,6-d][1,3]dioxole-6-carboxylate**

**2i**: Yield 80%, ee 99%.  $[\alpha]_D^{20} = +11.0^\circ$  ( $c = 1.30$ ,  $\text{CHCl}_3$ ).  $^1\text{H NMR}$  (300 MHz,  $\text{CDCl}_3$ )  $\delta$  2.94-3.11 (m, 2 H), 3.22-3.39 (m, 2 H), 3.56 (s, 3 H), 3.56-3.63 (m, 1 H), 4.14 (q,  $J = 7.5$  Hz, 1 H), 5.88-5.91 (m, 2 H), 6.68 (d,  $J = 6.6$  Hz, 2 H), 7.42-7.47 (m, 2 H),

7.52-7.58 (m, 1 H), 7.91-7.94 (m, 2 H);  $^{13}\text{C}$  NMR (75 MHz,  $\text{CDCl}_3$ )  $\delta$  34.0, 40.5, 42.1, 48.0, 51.6, 101.0, 104.9, 105.0, 128.0, 128.6, 133.1, 133.9, 136.9, 137.2, 146.7, 147.1, 174.2, 198.5; IR (KBr):  $\nu_{\text{max}}$  ( $\text{cm}^{-1}$ ) = 2949, 2891, 1730, 1686, 1475, 1238, 1038, 938, 753, 690; MS (ESI,  $m/z$ ) 361.2 ( $\text{M}+\text{Na}^+$ ); HRMS (EI) calcd for  $\text{C}_{20}\text{H}_{18}\text{O}_5$  ( $\text{M}^+$ ): 338.1154; Found: 338.1156.

[Daicel Chiralpak AD-H, hexanes/2-propanol = 90/10,  $v = 1.0 \text{ mL}/\text{min}^{-1}$ ,  $\lambda = 230 \text{ nm}$ ,  $t_1$  (minor) = 17.950 min,  $t_2$  (major) = 21.302 min].

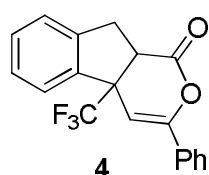

### 3-phenyl-4a-(trifluoromethyl)-9,9a-dihydroindeno[2,1-c]pyran-1(4aH)-one

**4** Yield 18%, ee 31%.  $[\alpha]_{\text{D}}^{20} = +24.6^\circ$  ( $c = 1.67$ ,  $\text{CHCl}_3$ ).  $^1\text{H}$  NMR (300 MHz,  $\text{CDCl}_3$ )  $\delta$  3.32-3.40 (m, 1 H), 3.56-3.63 (m, 1 H), 3.69-3.75 (m, 1 H), 5.67 (s, 1 H), 7.30-7.40 (m, 6 H), 7.48-7.50 (m, 1 H), 7.64-7.67 (m, 2 H);  $^{13}\text{C}$  NMR (75 MHz,  $\text{CDCl}_3$ )  $\delta$  35.6, 42.7, 95.8, 123.7, 124.5, 124.6, 125.1, 125.2, 127.9, 128.3, 128.5, 128.6, 129.3, 130.1, 131.2, 138.6, 140.5, 150.8, 167.6; IR (KBr):  $\nu_{\text{max}}$  ( $\text{cm}^{-1}$ ) = 2964, 2920, 2851, 1770, 1449, 1261, 1147, 1097, 1024, 801, 761, 690; MS (EI,  $m/z$ , rel. intensity) 330 ( $\text{M}^+$ , 8), 43 (100); HRMS (EI) calcd for  $\text{C}_{19}\text{H}_{13}\text{O}_2\text{F}_3$  ( $\text{M}^+$ ): 330.0868; Found: 330.0869.

[Daicel Chiralcel OD-H, hexanes/2-propanol = 99/1,  $v = 0.7 \text{ mL}/\text{min}^{-1}$ ,  $\lambda = 230 \text{ nm}$ ,  $t_1$  (major) = 16.165 min,  $t_2$  (minor) = 19.682 min].

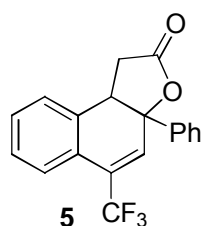

### 3a-phenyl-5-(trifluoromethyl)-1,9b-dihydronaphtho[2,1-b]furan-2(3aH)-one

**5** Yield 55%, ee 10%.  $[\alpha]_{\text{D}}^{20} = +1.50^\circ$  ( $c = 0.90$ ,  $\text{CHCl}_3$ ).  $^1\text{H}$  NMR (300 MHz,  $\text{CDCl}_3$ )  $\delta$  2.71-2.81 (m, 1 H), 2.91 (dd,  $J = 6.6, 16.2 \text{ Hz}$ , 1 H), 4.25 (dd,  $J = 6.9, 14.1 \text{ Hz}$ , 1 H), 7.05 (d,  $J = 7.8 \text{ Hz}$ , 2 H), 7.13-7.26 (m, 5 H), 7.39-7.44 (m, 2 H), 7.57-7.59 (m, 1 H);  $^{13}\text{C}$  NMR (75 MHz,  $\text{CDCl}_3$ )  $\delta$  30.5, 48.8, 86.0, 124.8, 125.7, 126.0, 128.1, 128.7,

128.8, 128.9, 129.0, 129.3, 129.8, 133.8, 134.9, 135.2, 135.2, 175.1; IR (KBr):  $\nu_{\max}$  ( $\text{cm}^{-1}$ ) = 2926, 2854, 1801, 1710, 1297, 1173, 1128, 936, 770, 697; MS (EI,  $m/z$ , rel. intensity) 330 ( $M^+$ , 36), 57 (100); HRMS (EI) calcd for  $C_{19}H_{13}O_2F_3$  ( $M^+$ ): 330.0868; Found: 330.0872.

[Daicel Chiralcel OD-H, hexanes/2-propanol = 80/20,  $v = 0.7 \text{ mL/min}^{-1}$ ,  $\lambda = 230 \text{ nm}$ ,  $t_1$  (major) = 10.867 min,  $t_2$  (minor) = 12.718 min].

### References:

- [1] Y. Li, Z. Feng, S.-L. You, *Chem. Commun.* **2008**, 2263.
- [2] J.-W. Yang, M. Hechavarria, B. List, *J. Am. Chem. Soc.* **2005**, *127*, 15036.
- [3] E. M. Phillips, M. Wadamoto, A. Chan, K. A. Scheidt, *Angew. Chem., Int. Ed.* **2007**, *46*, 3107.

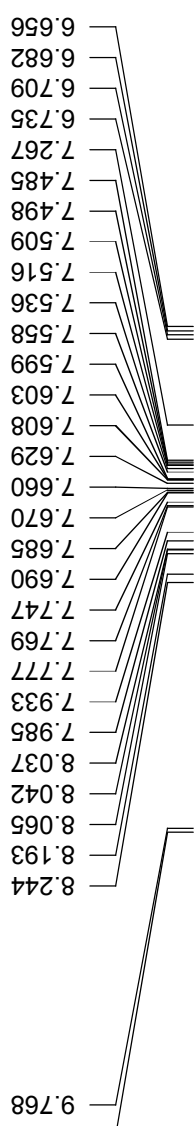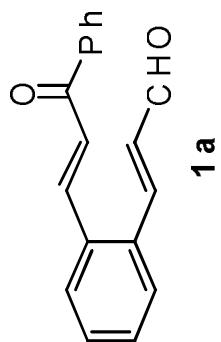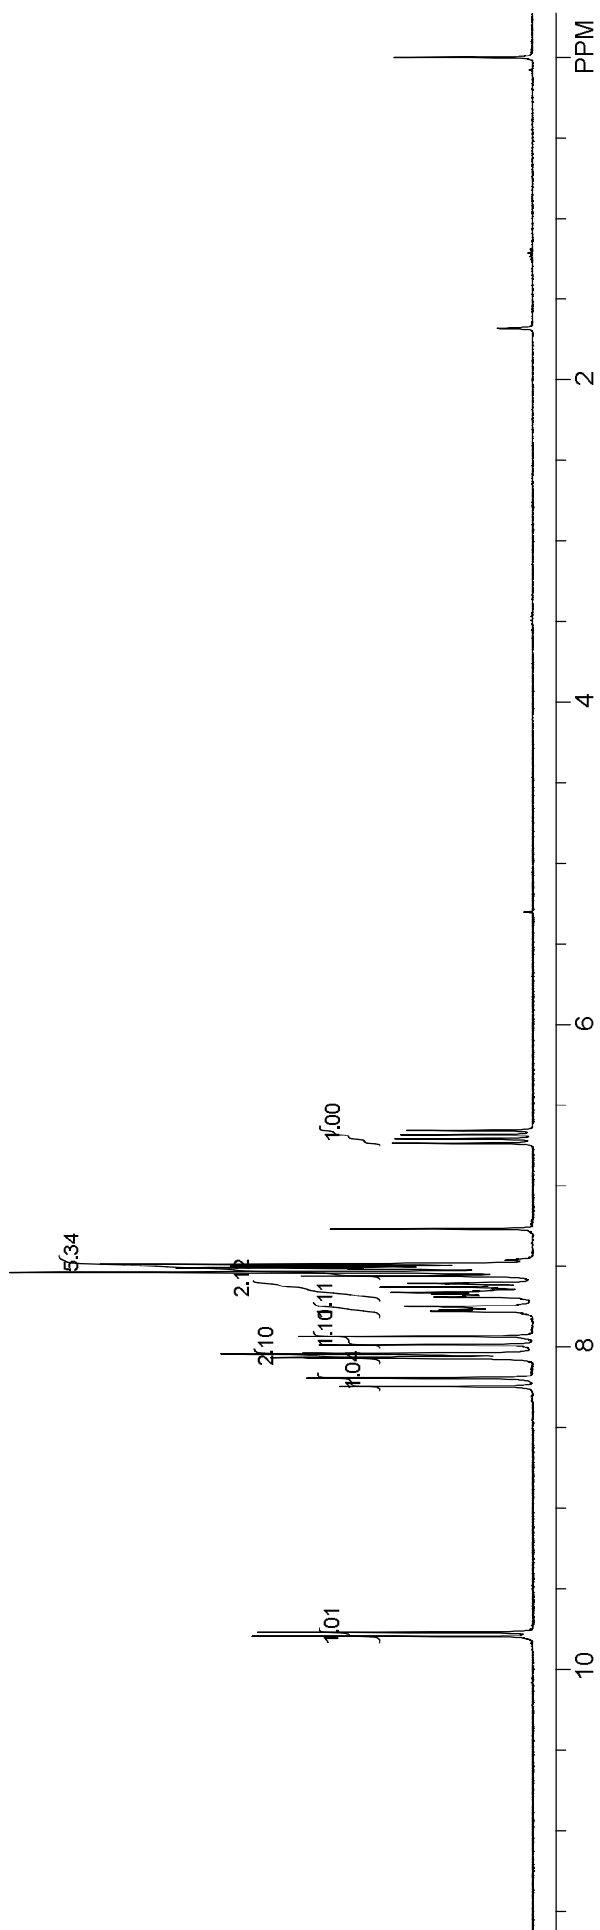

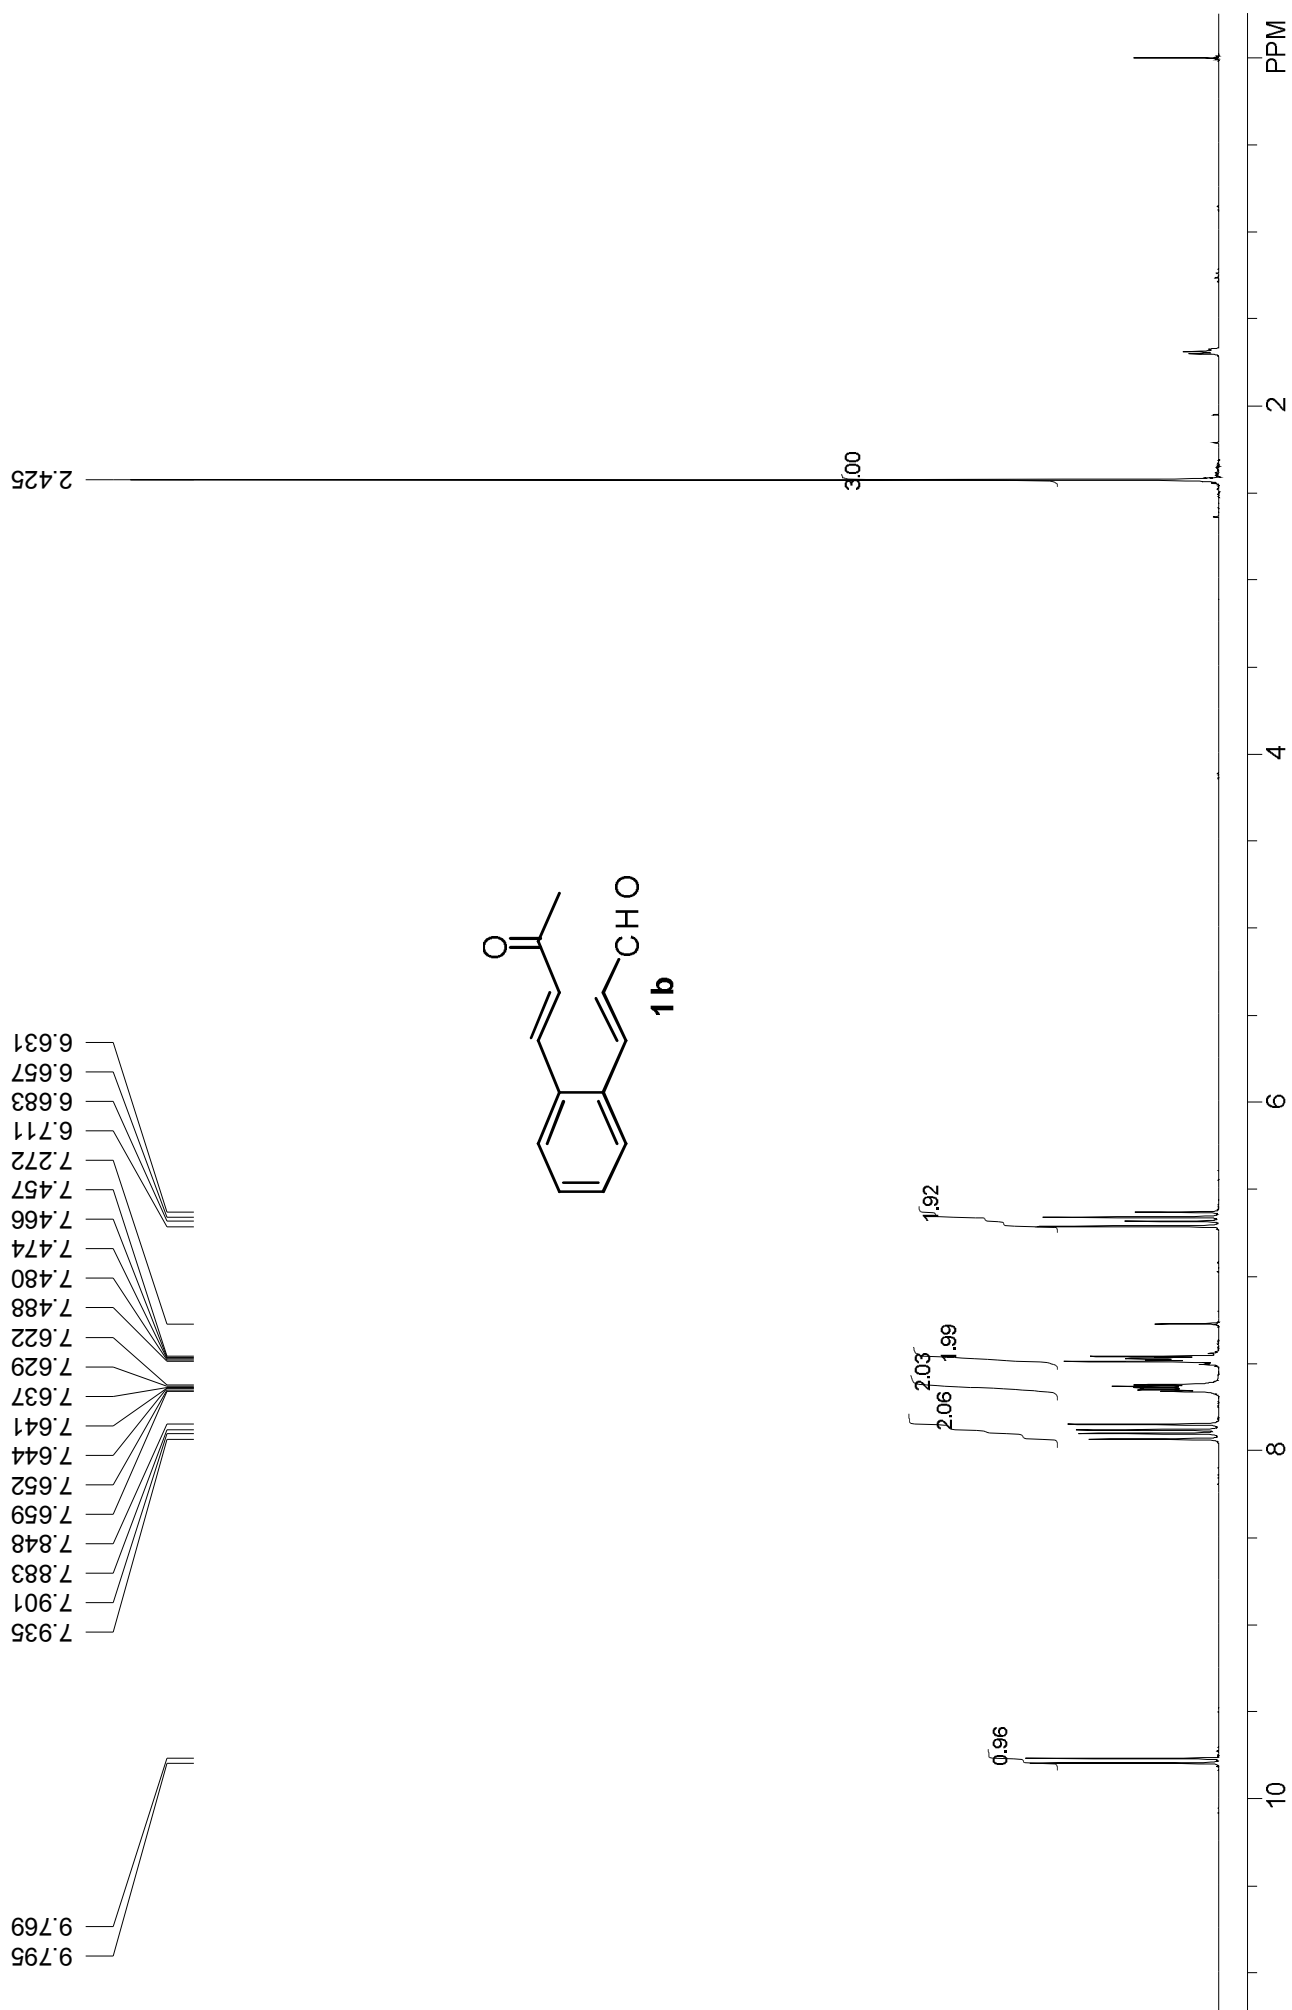

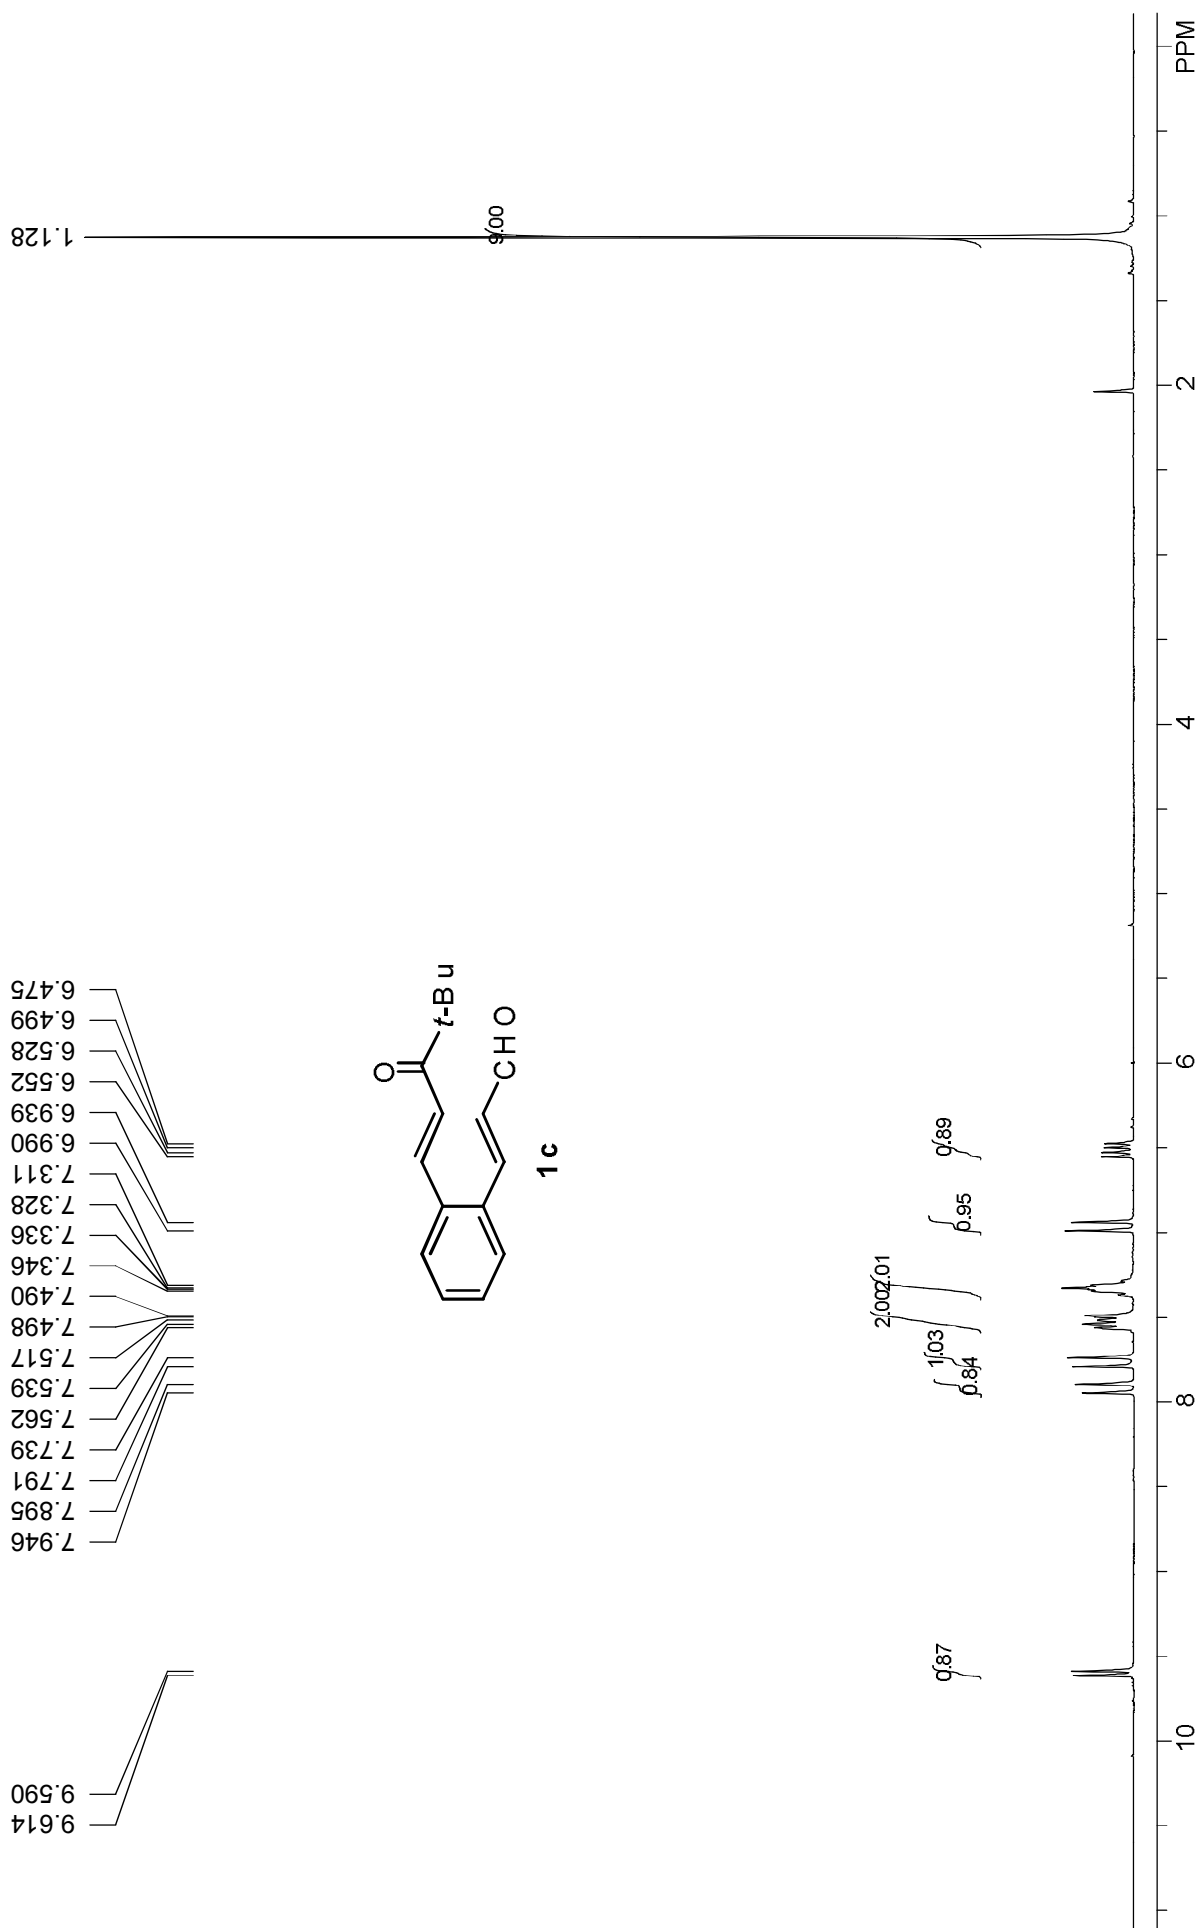

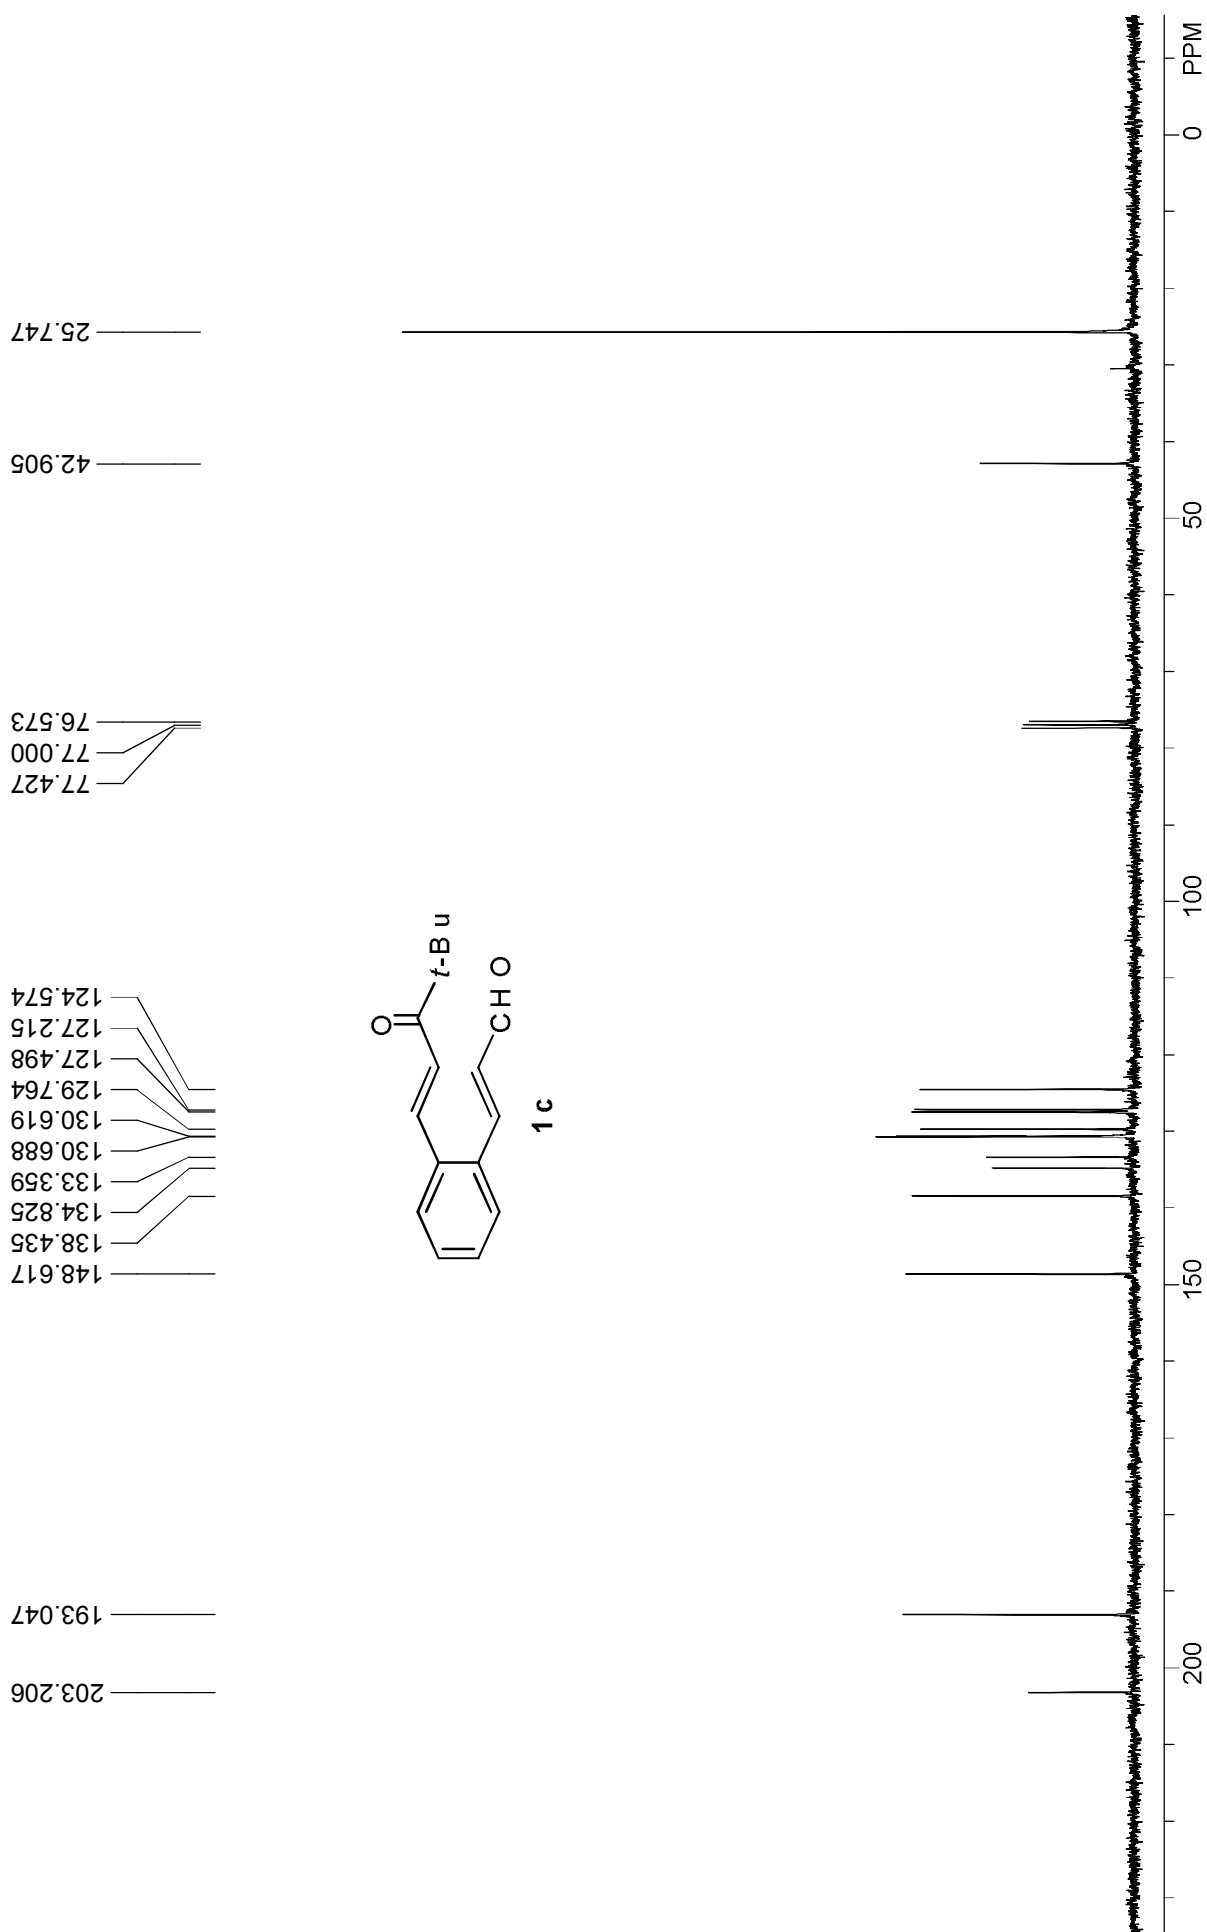

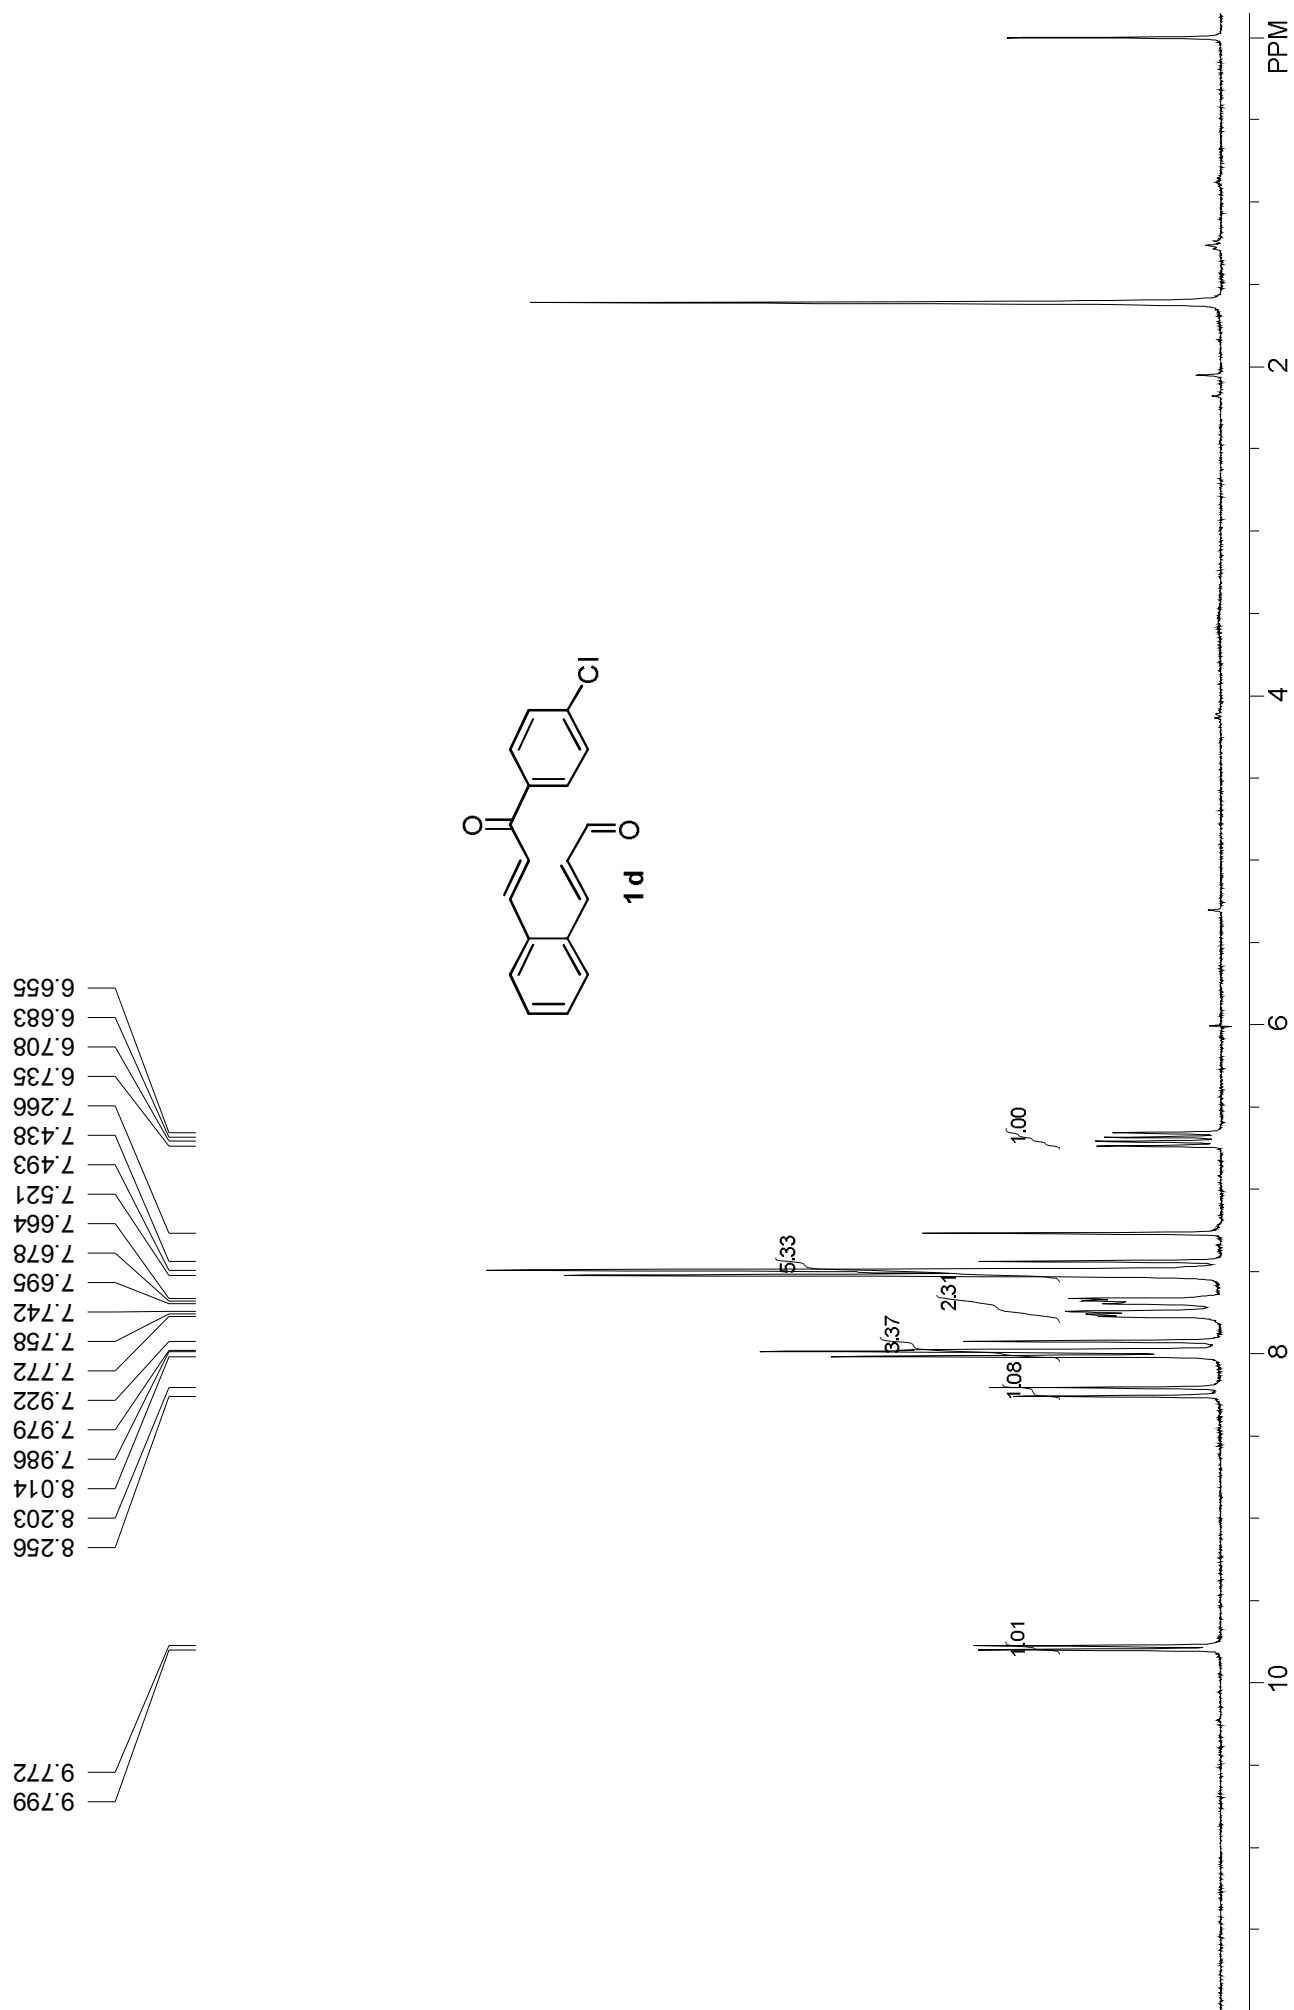



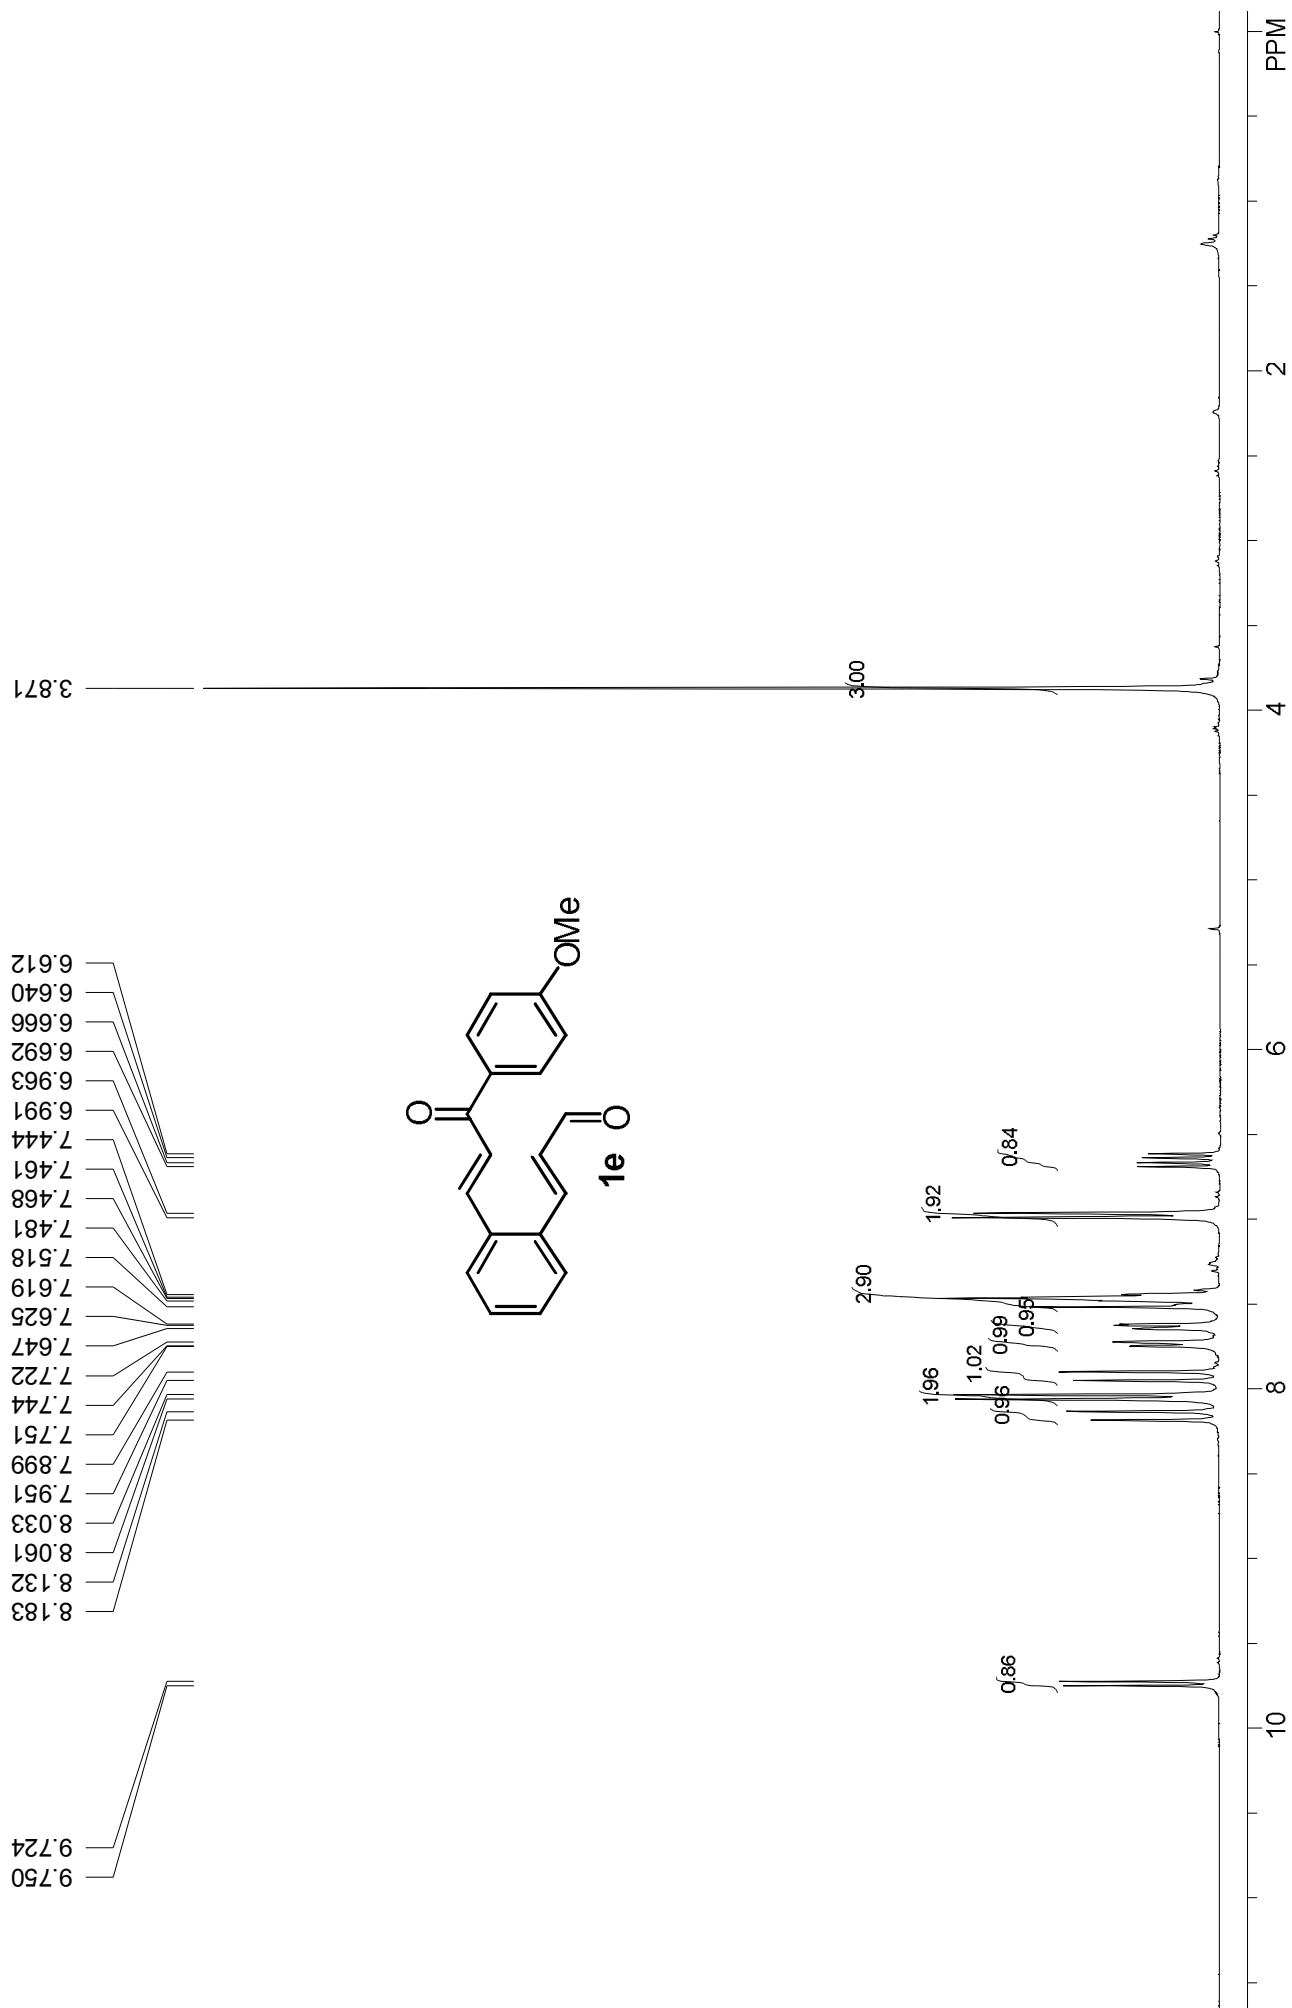

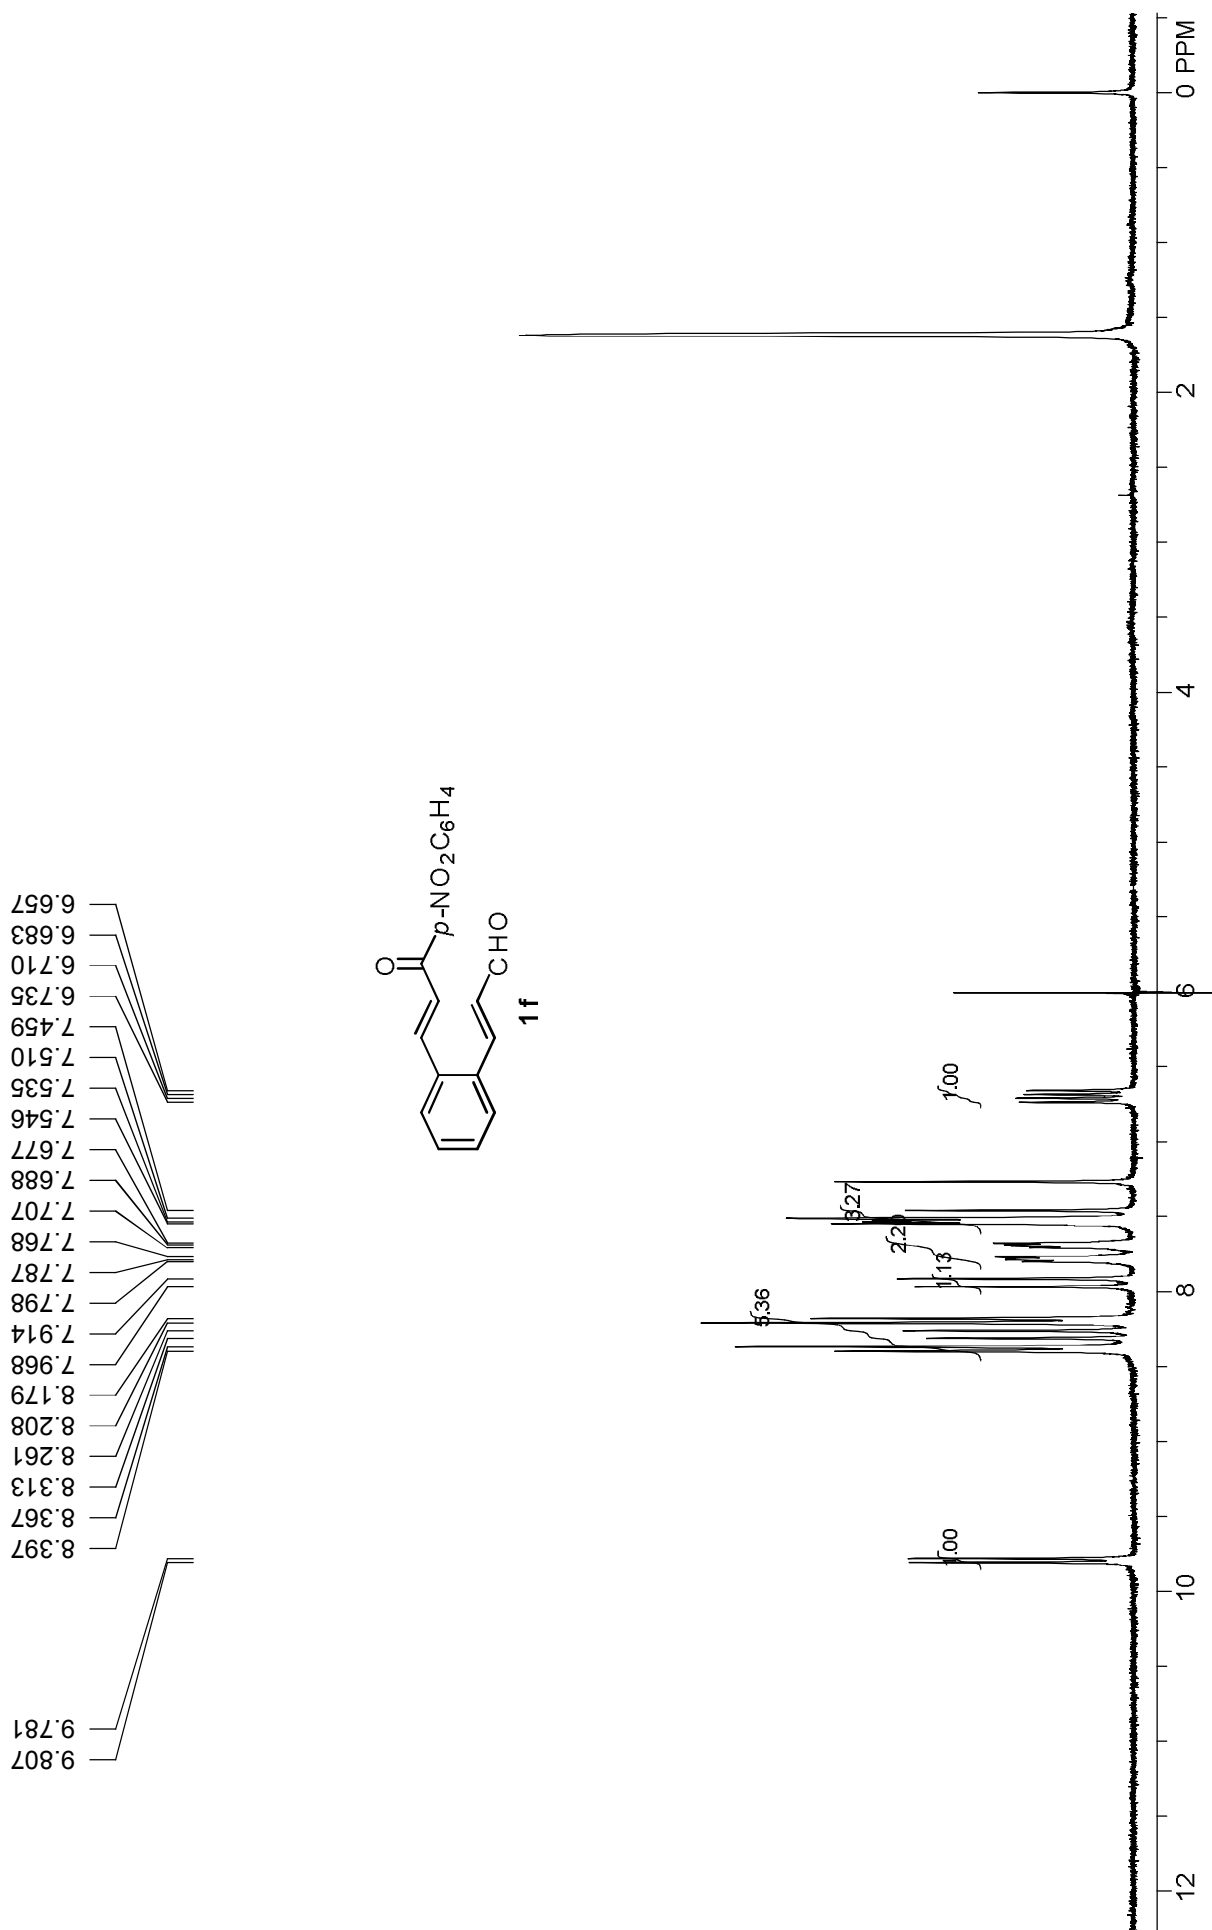

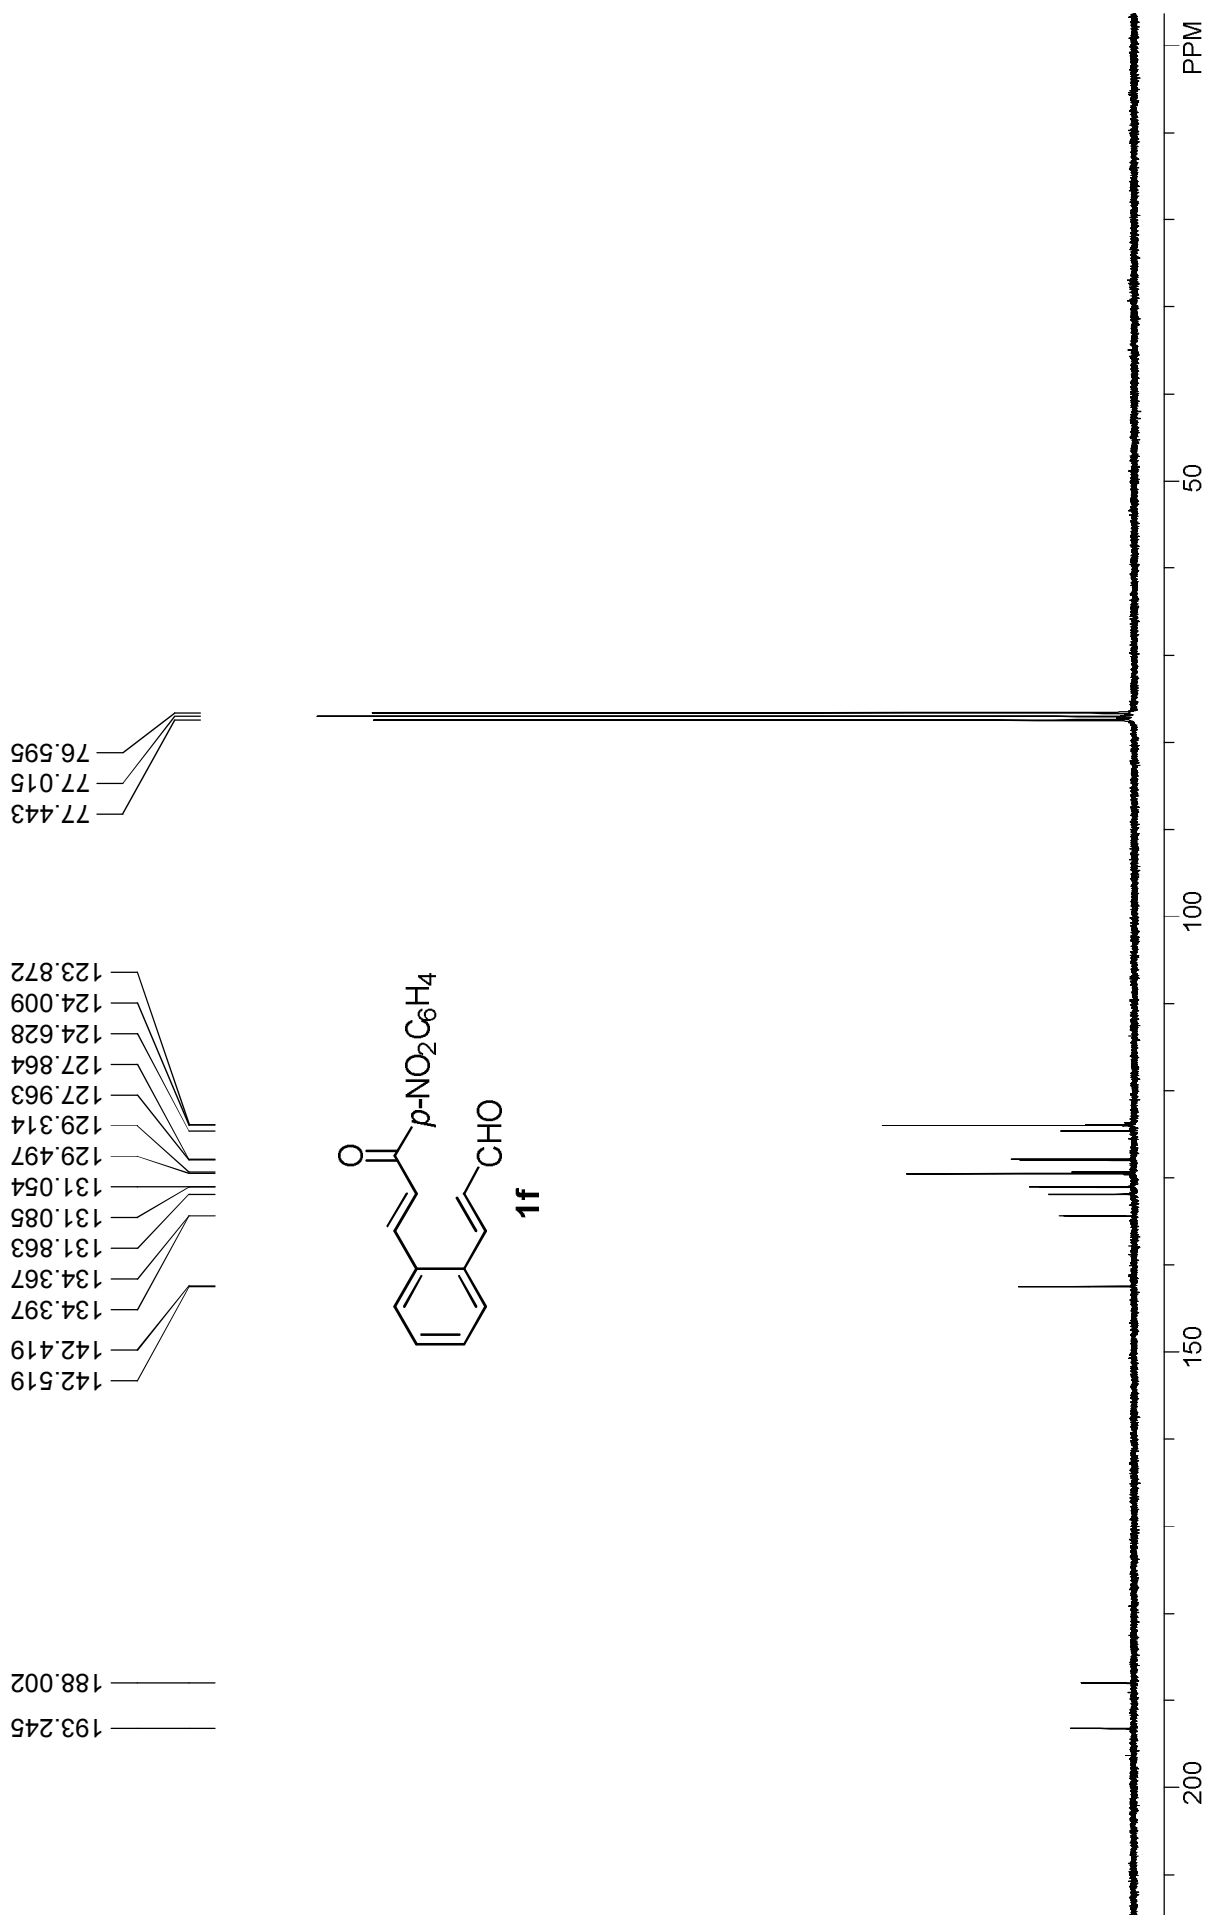

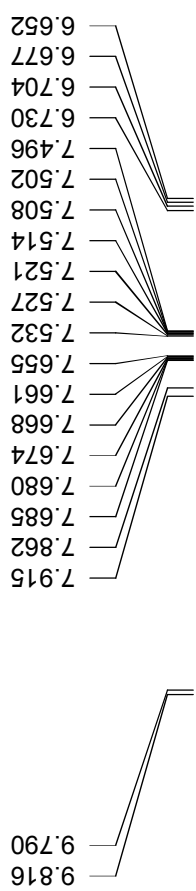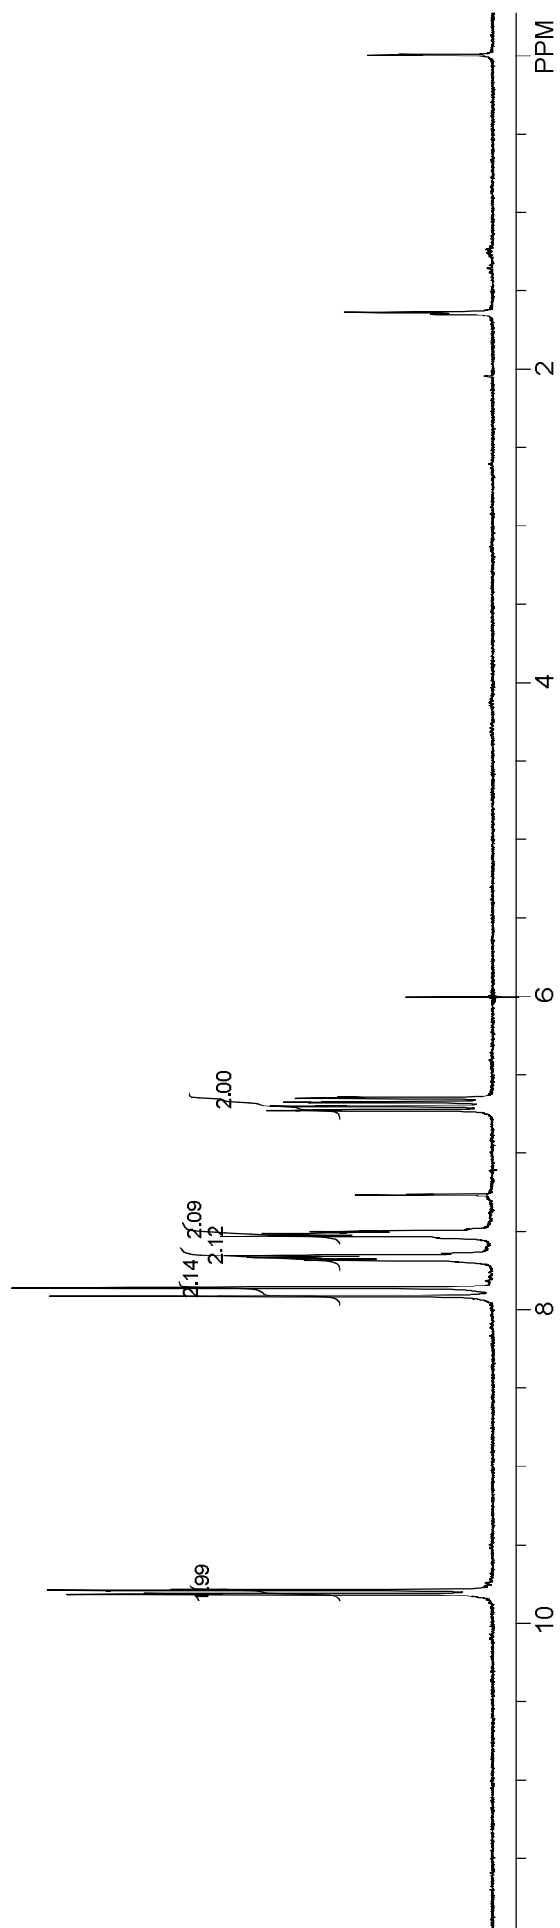

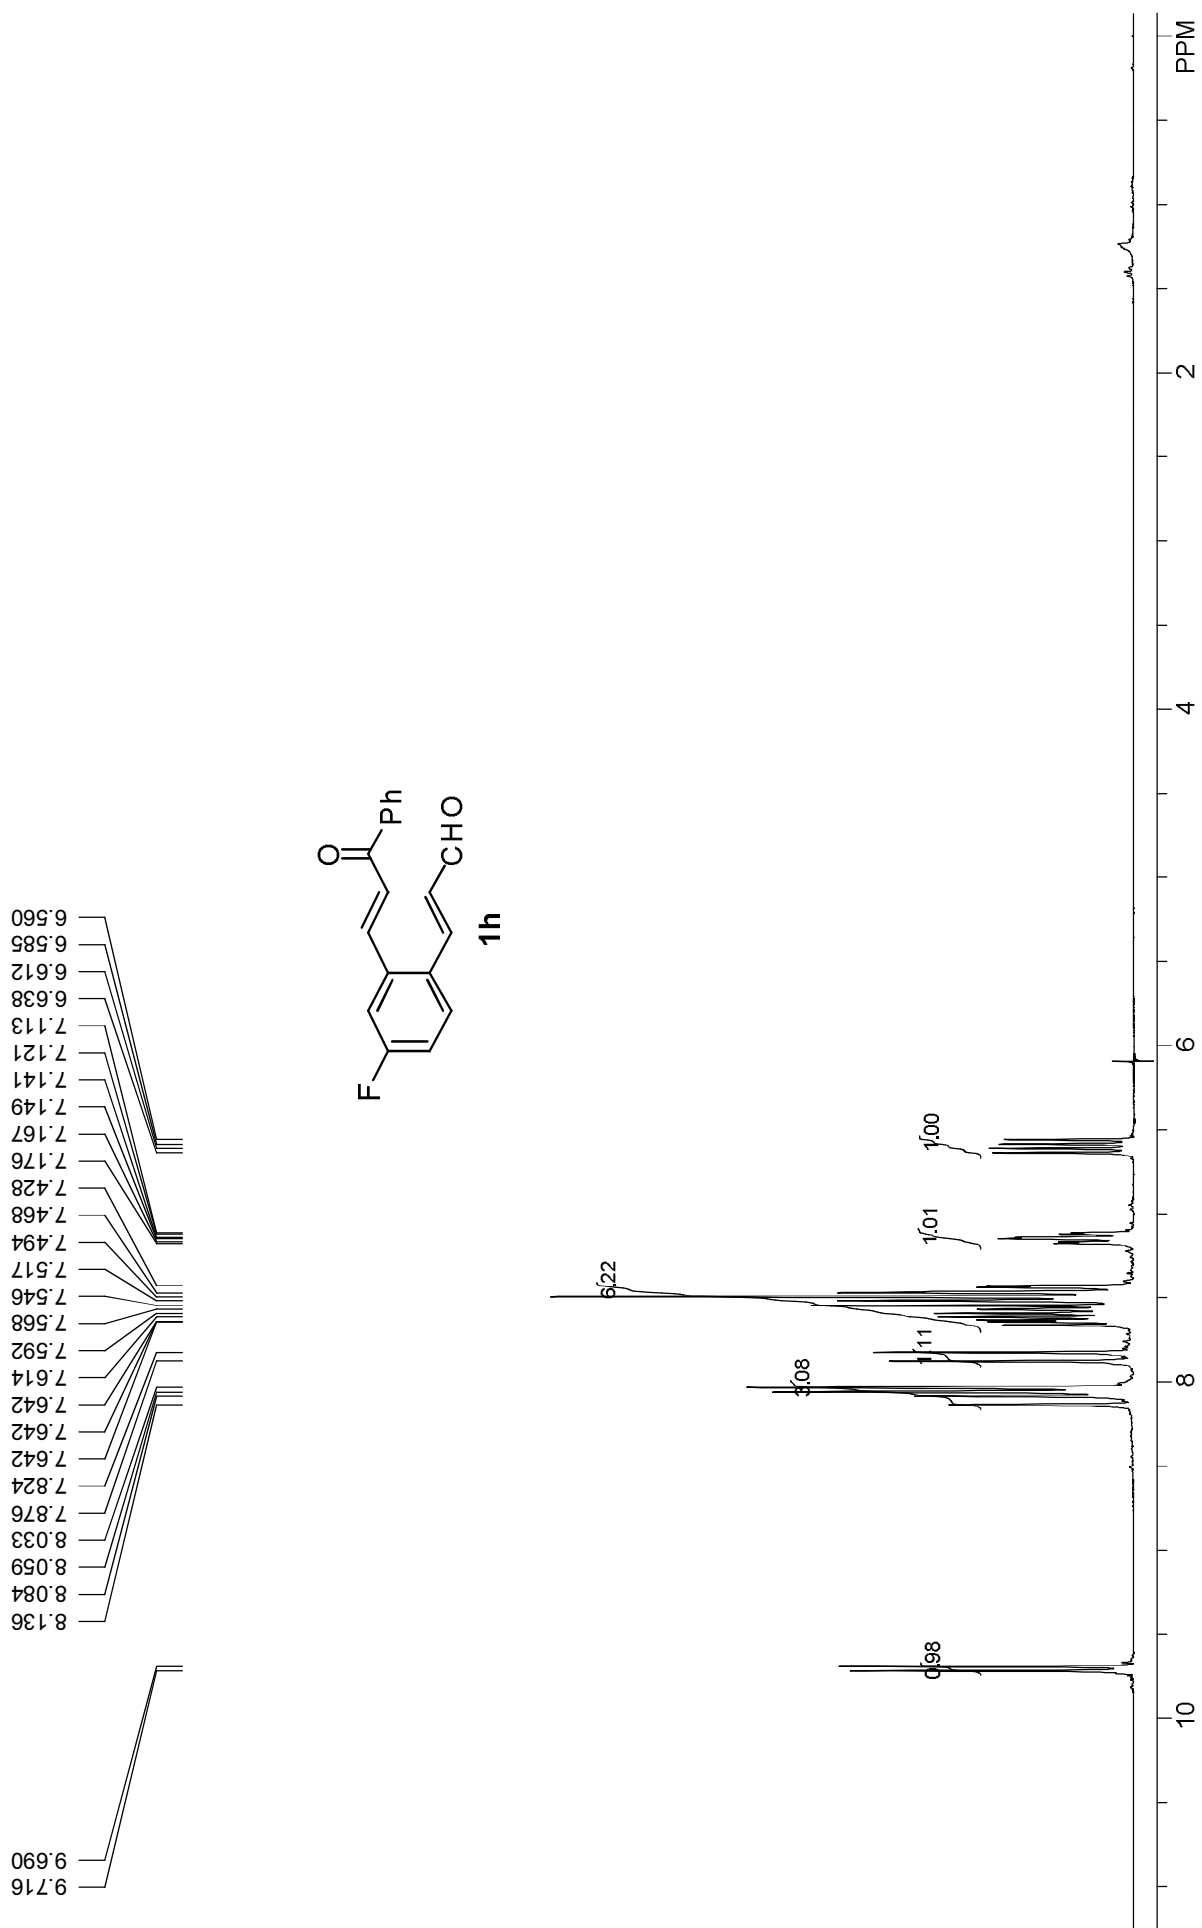

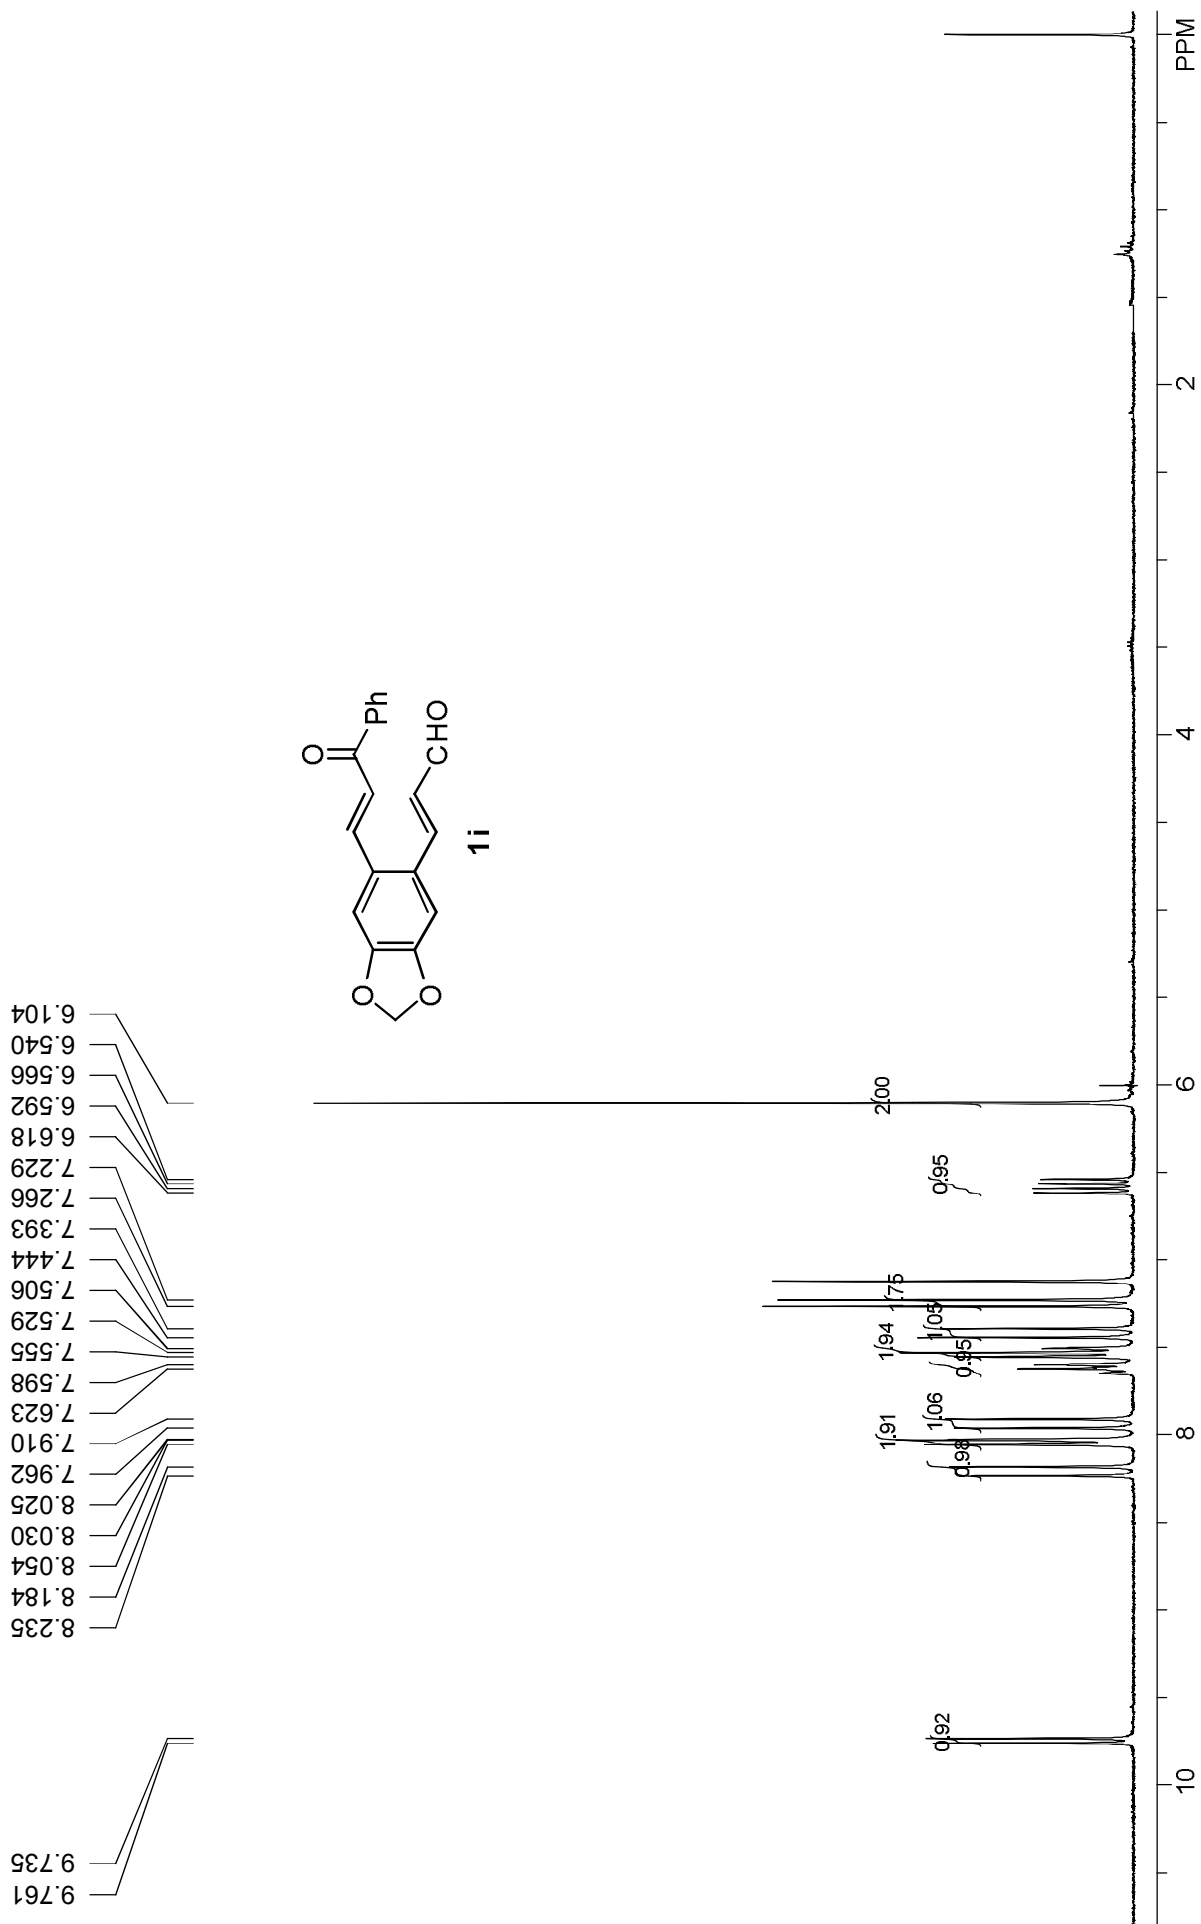

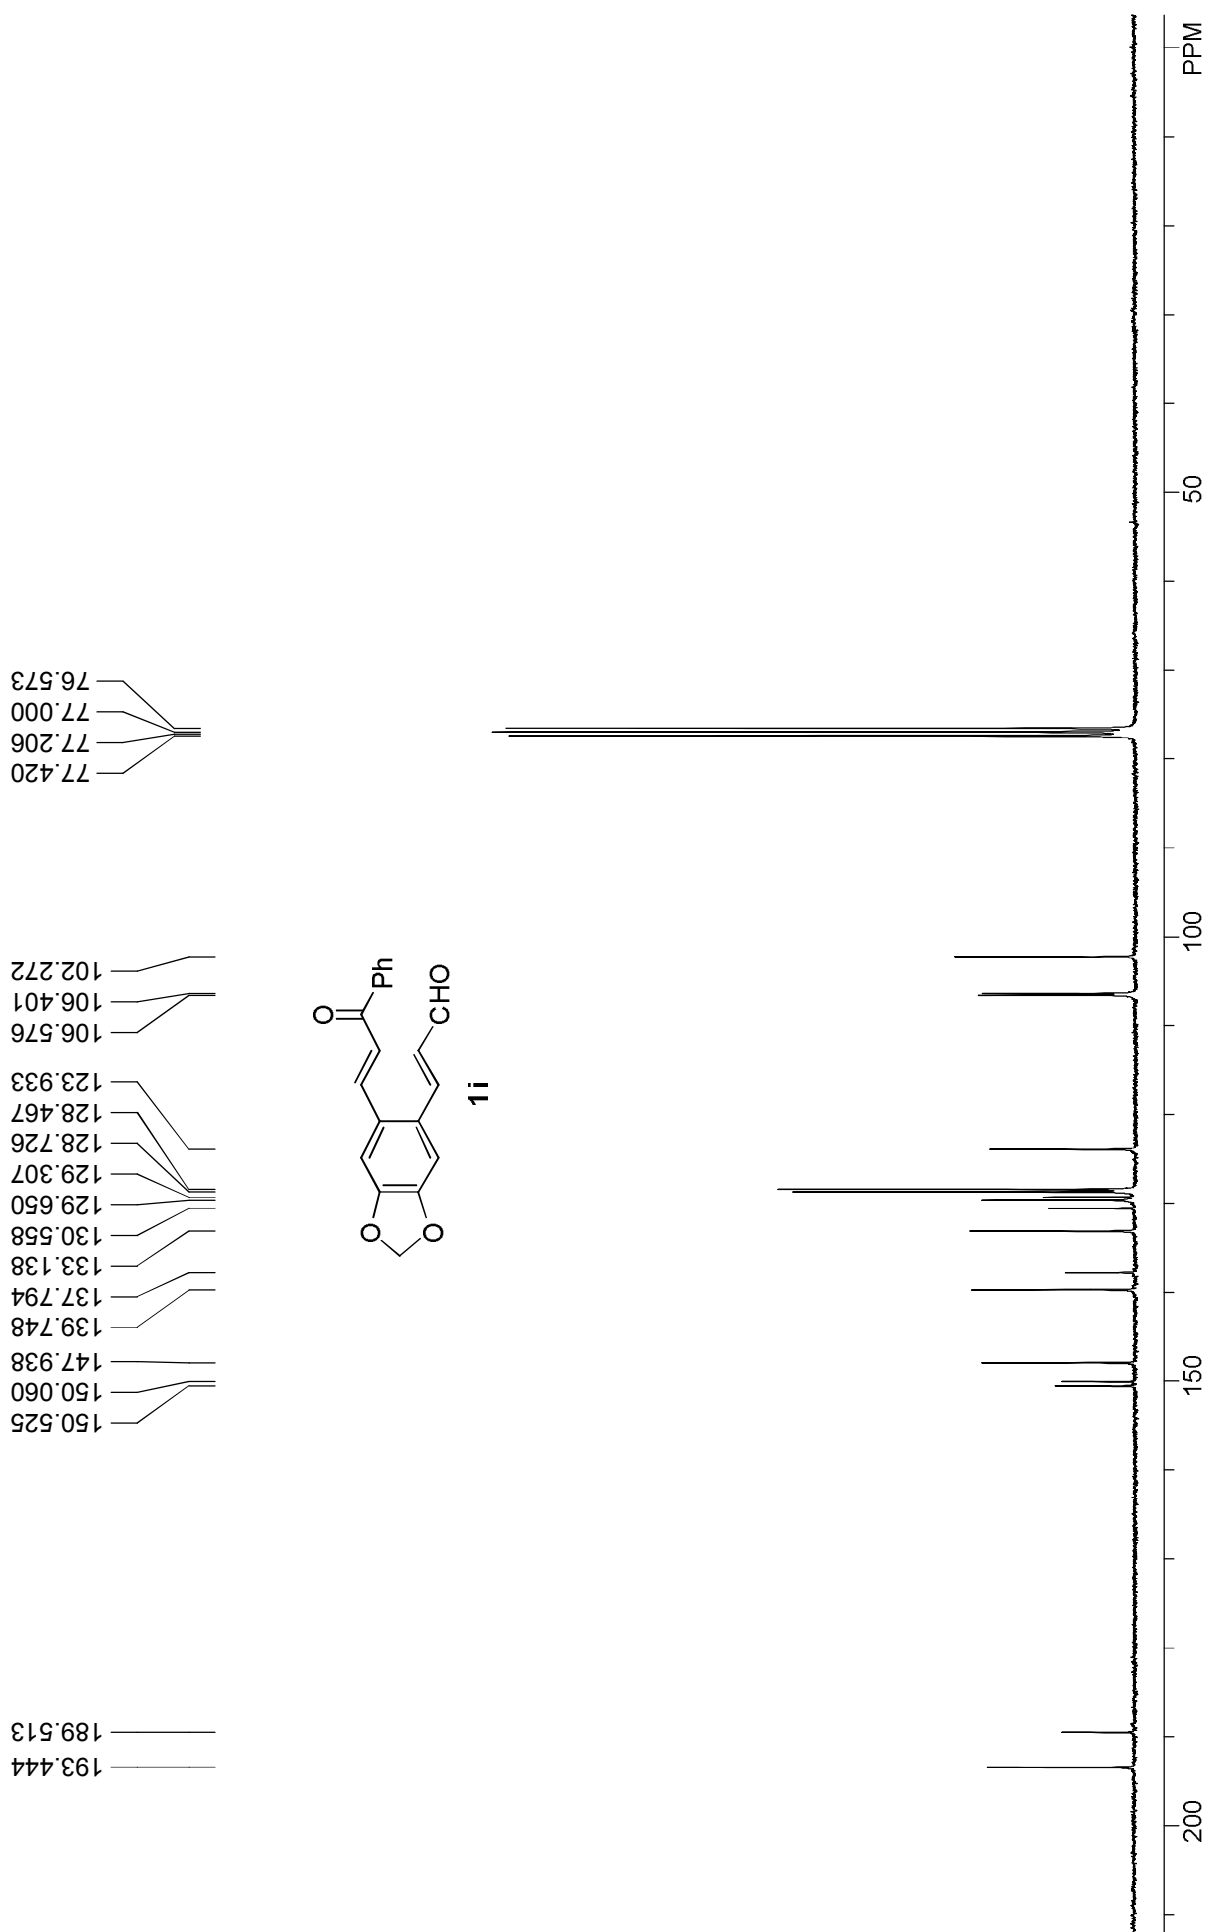

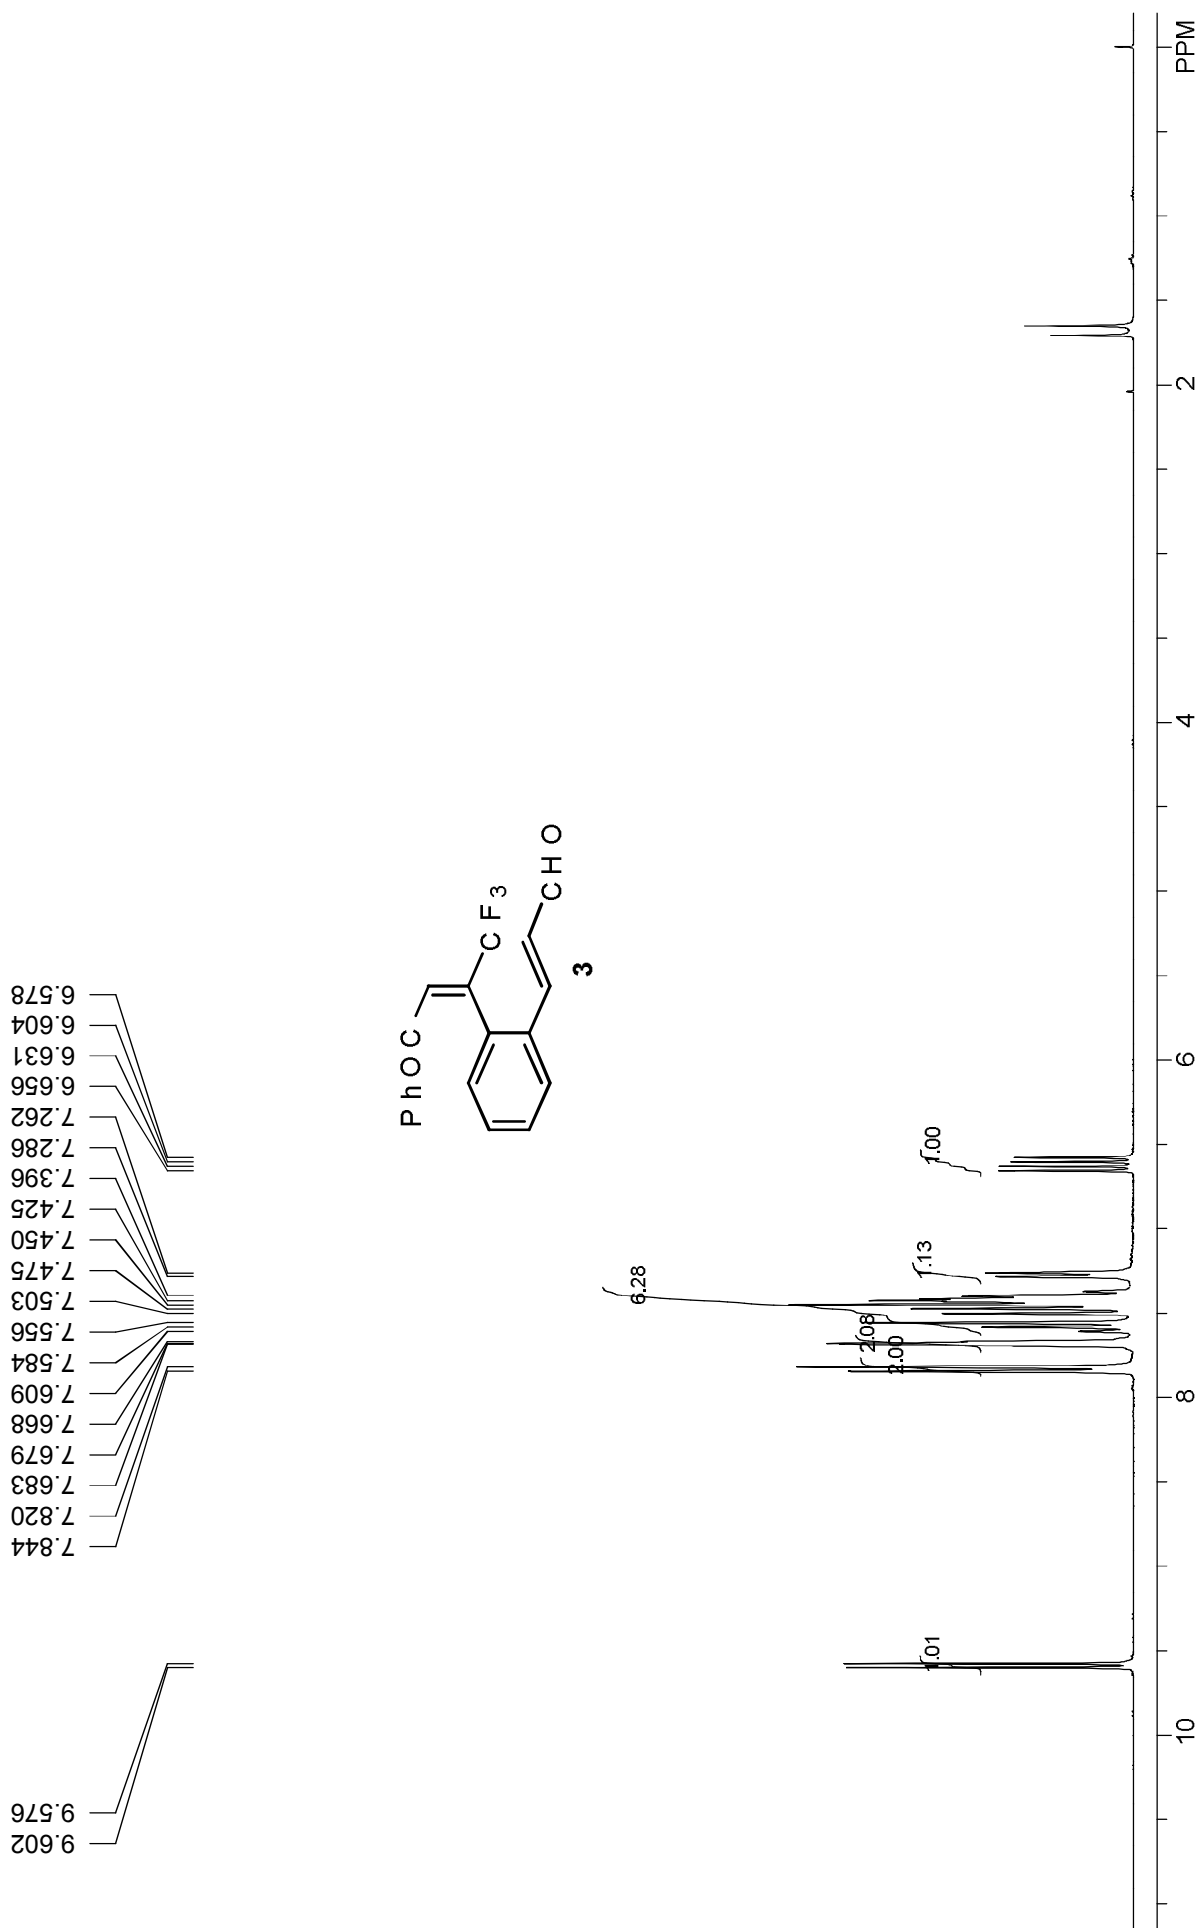



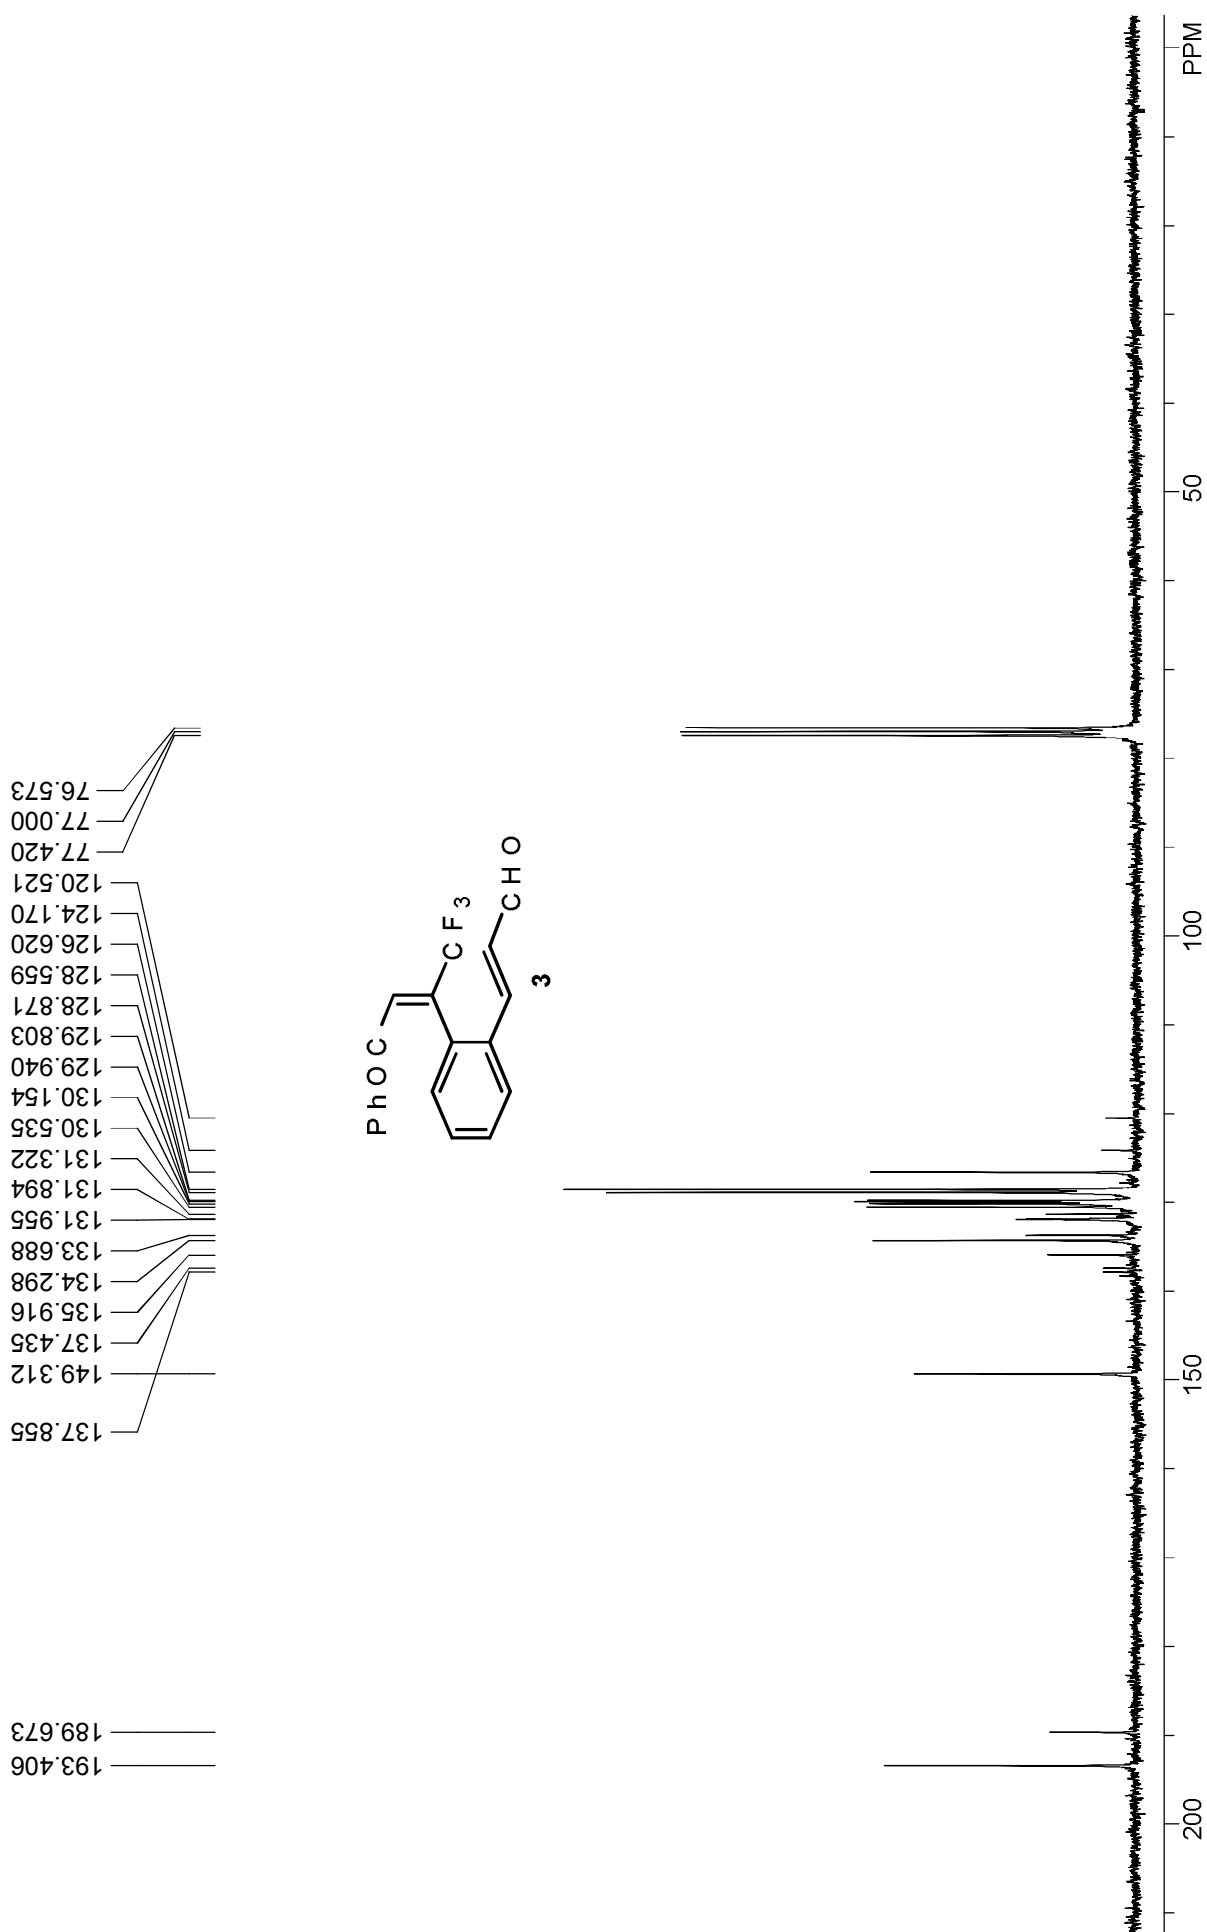

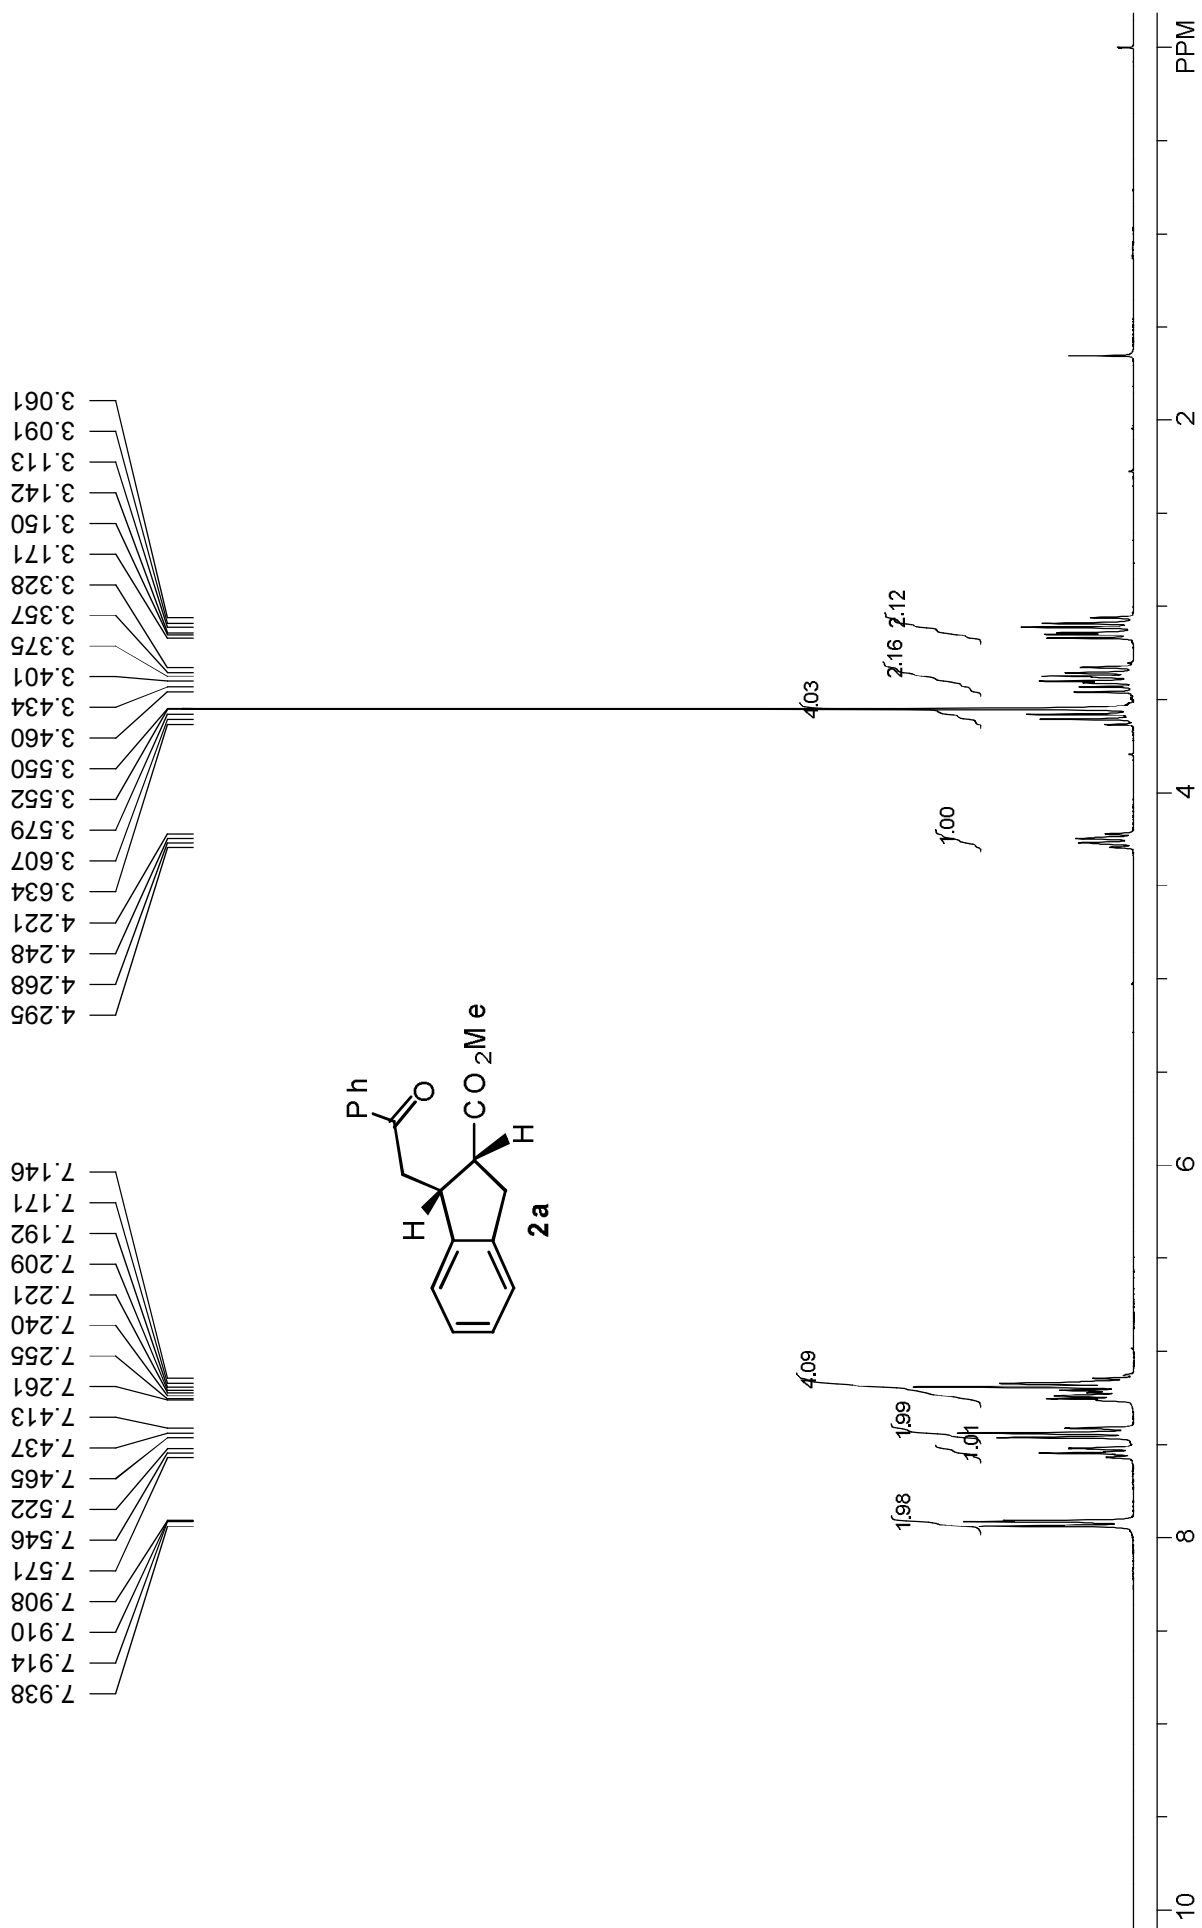

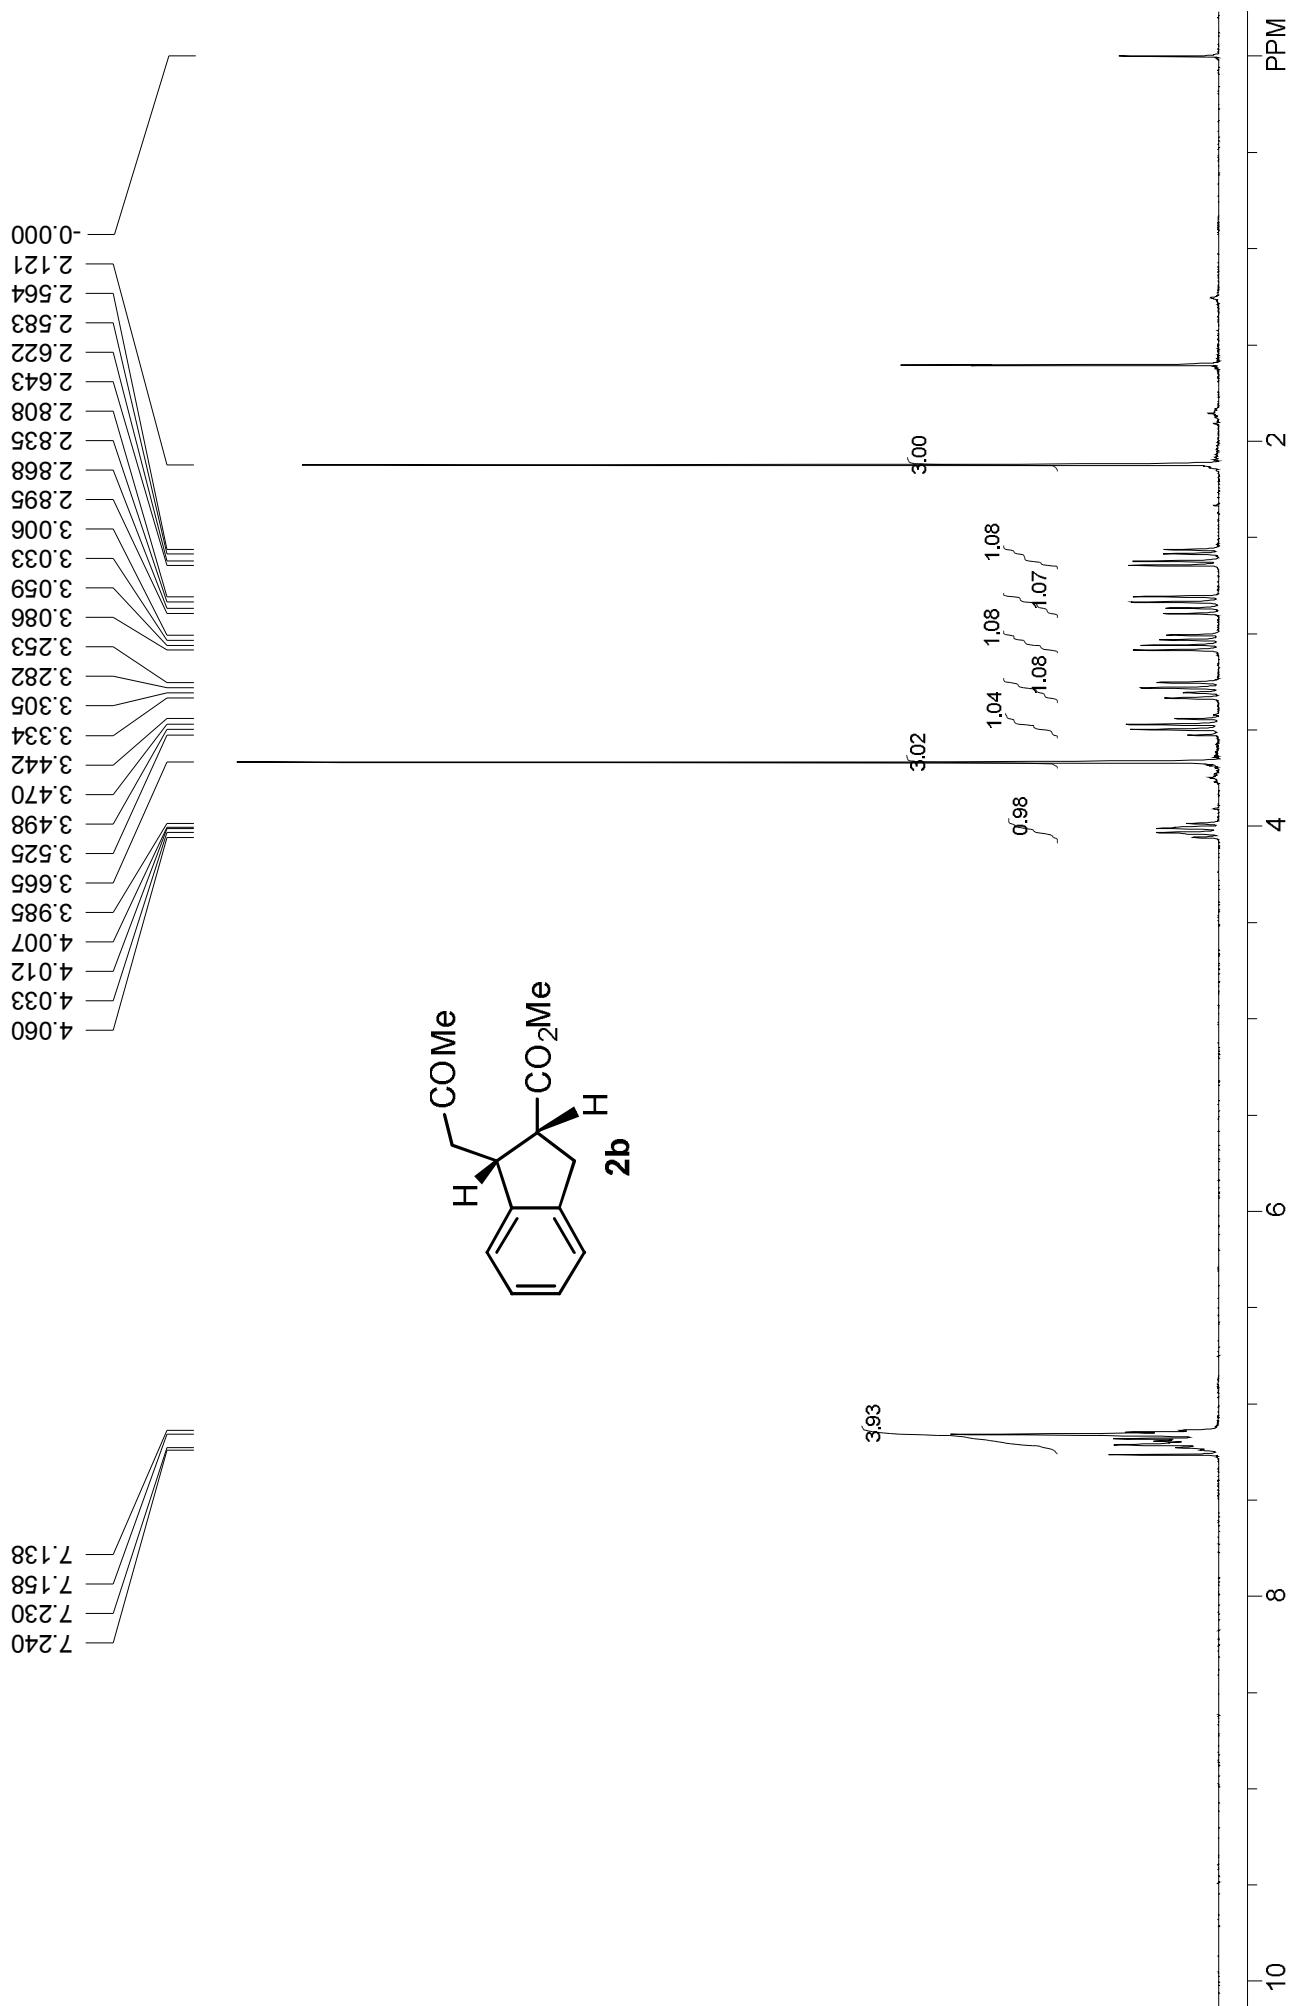

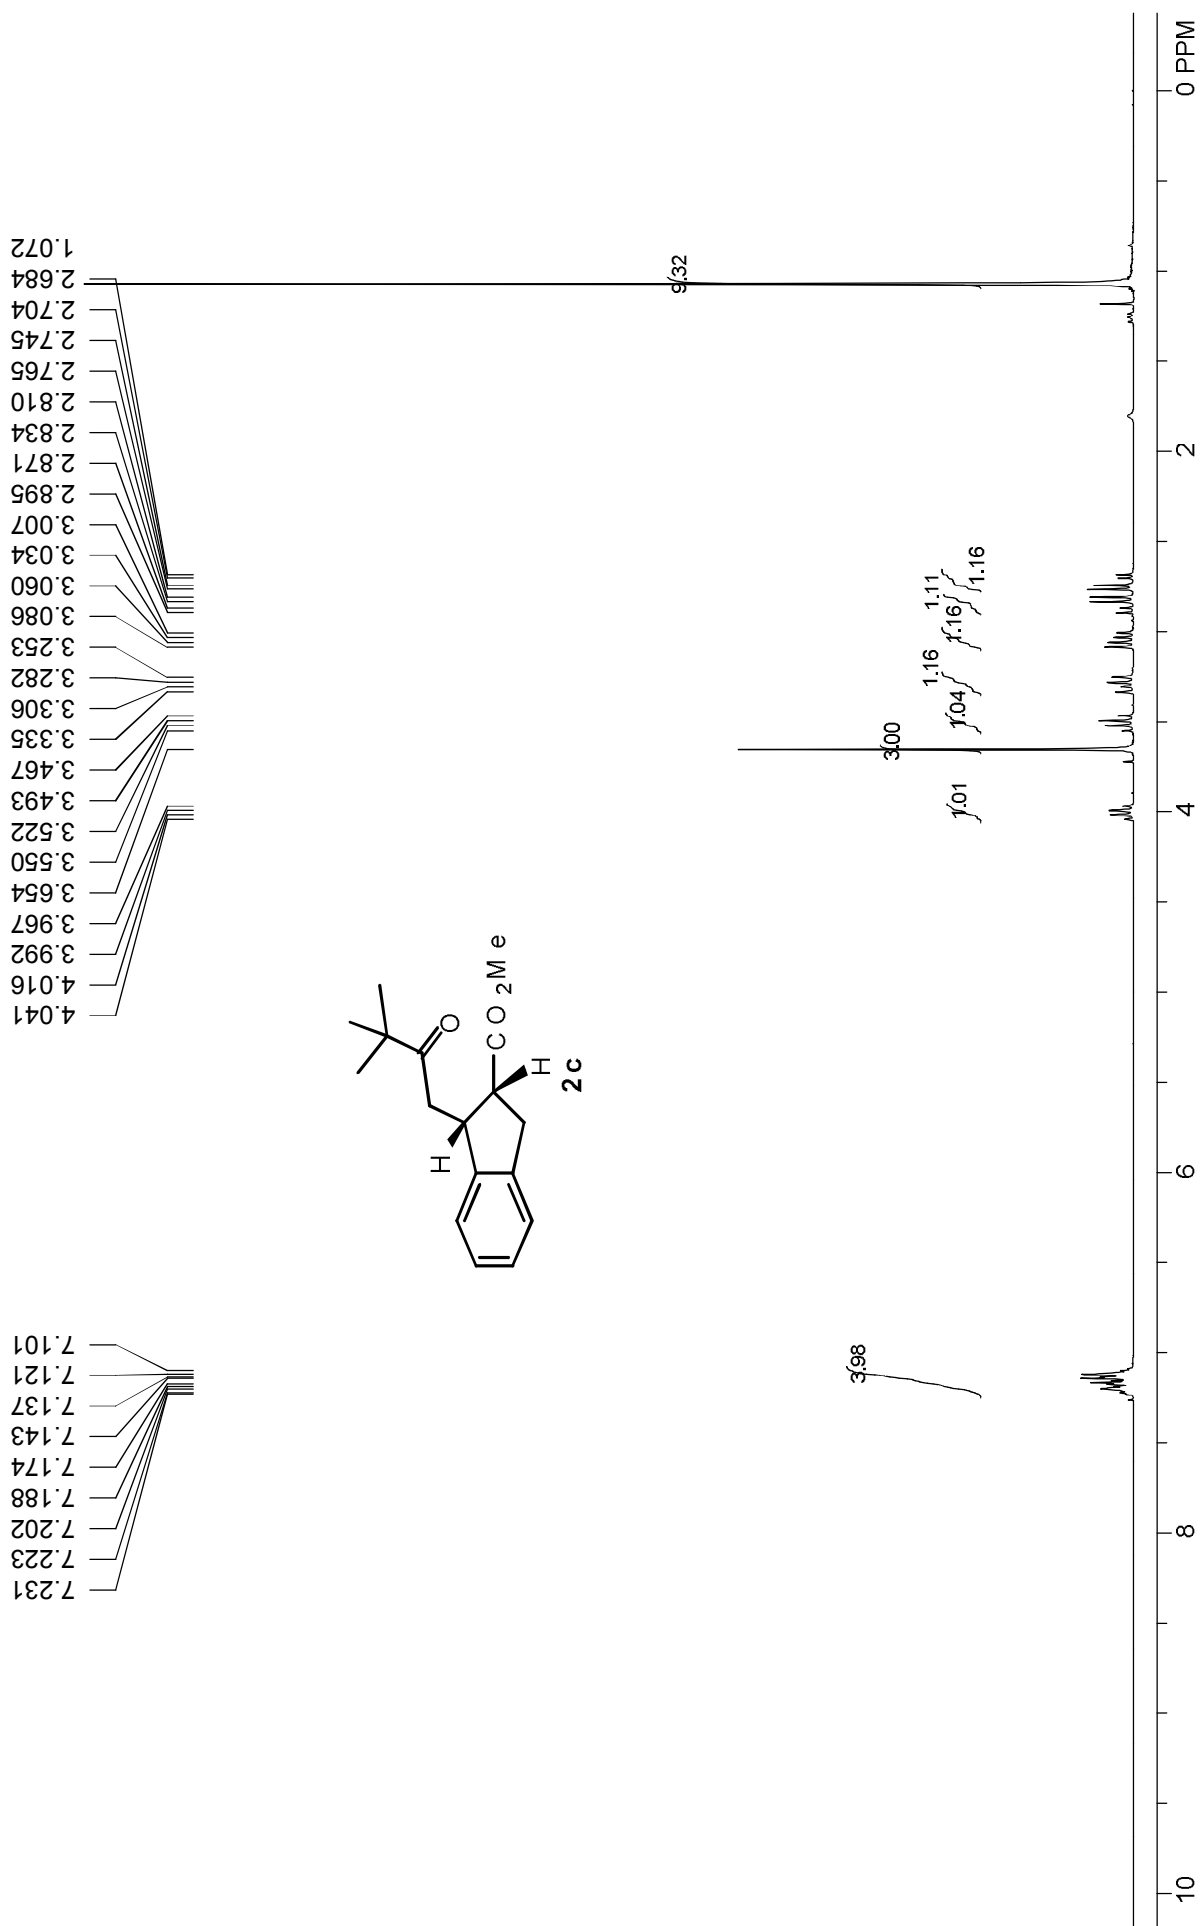

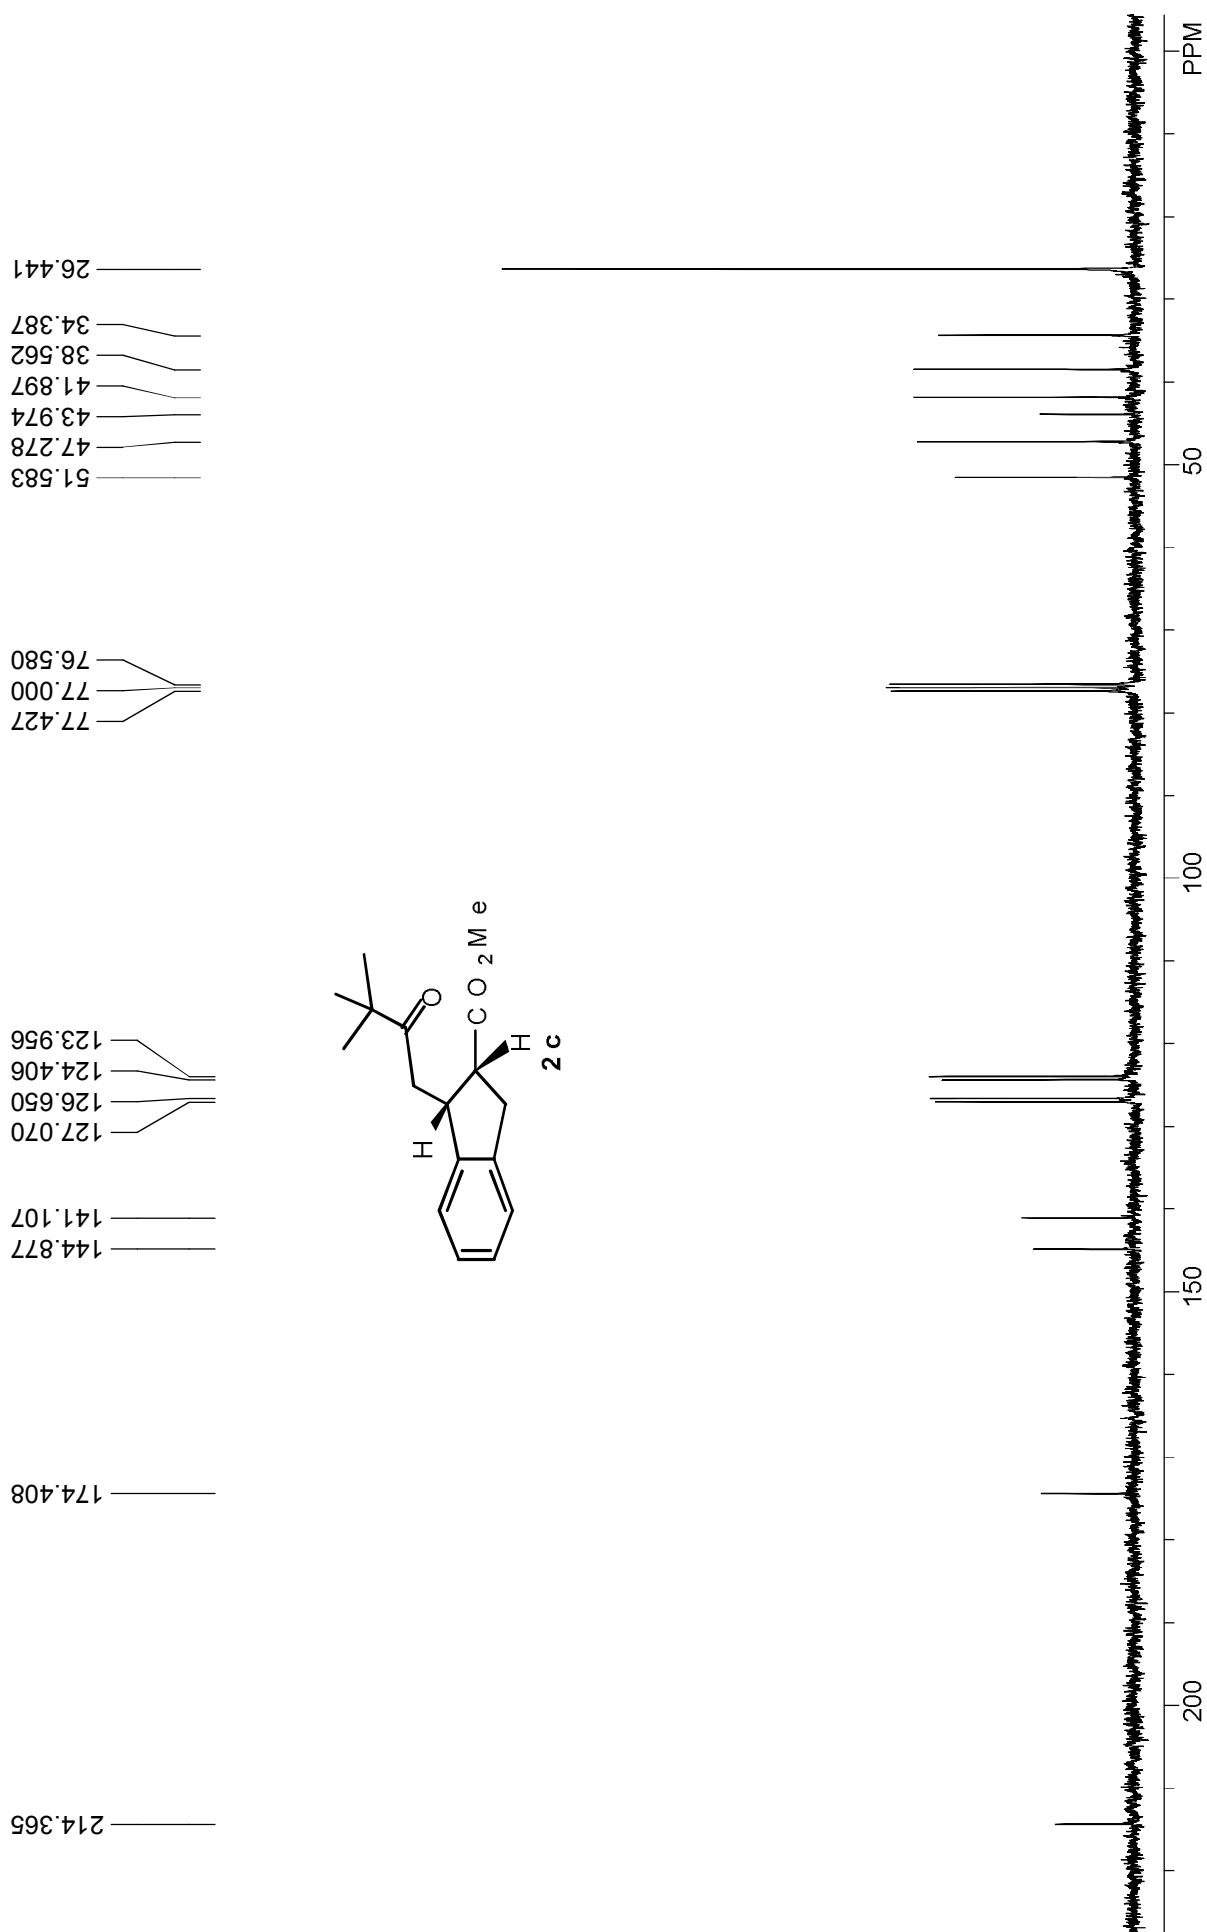

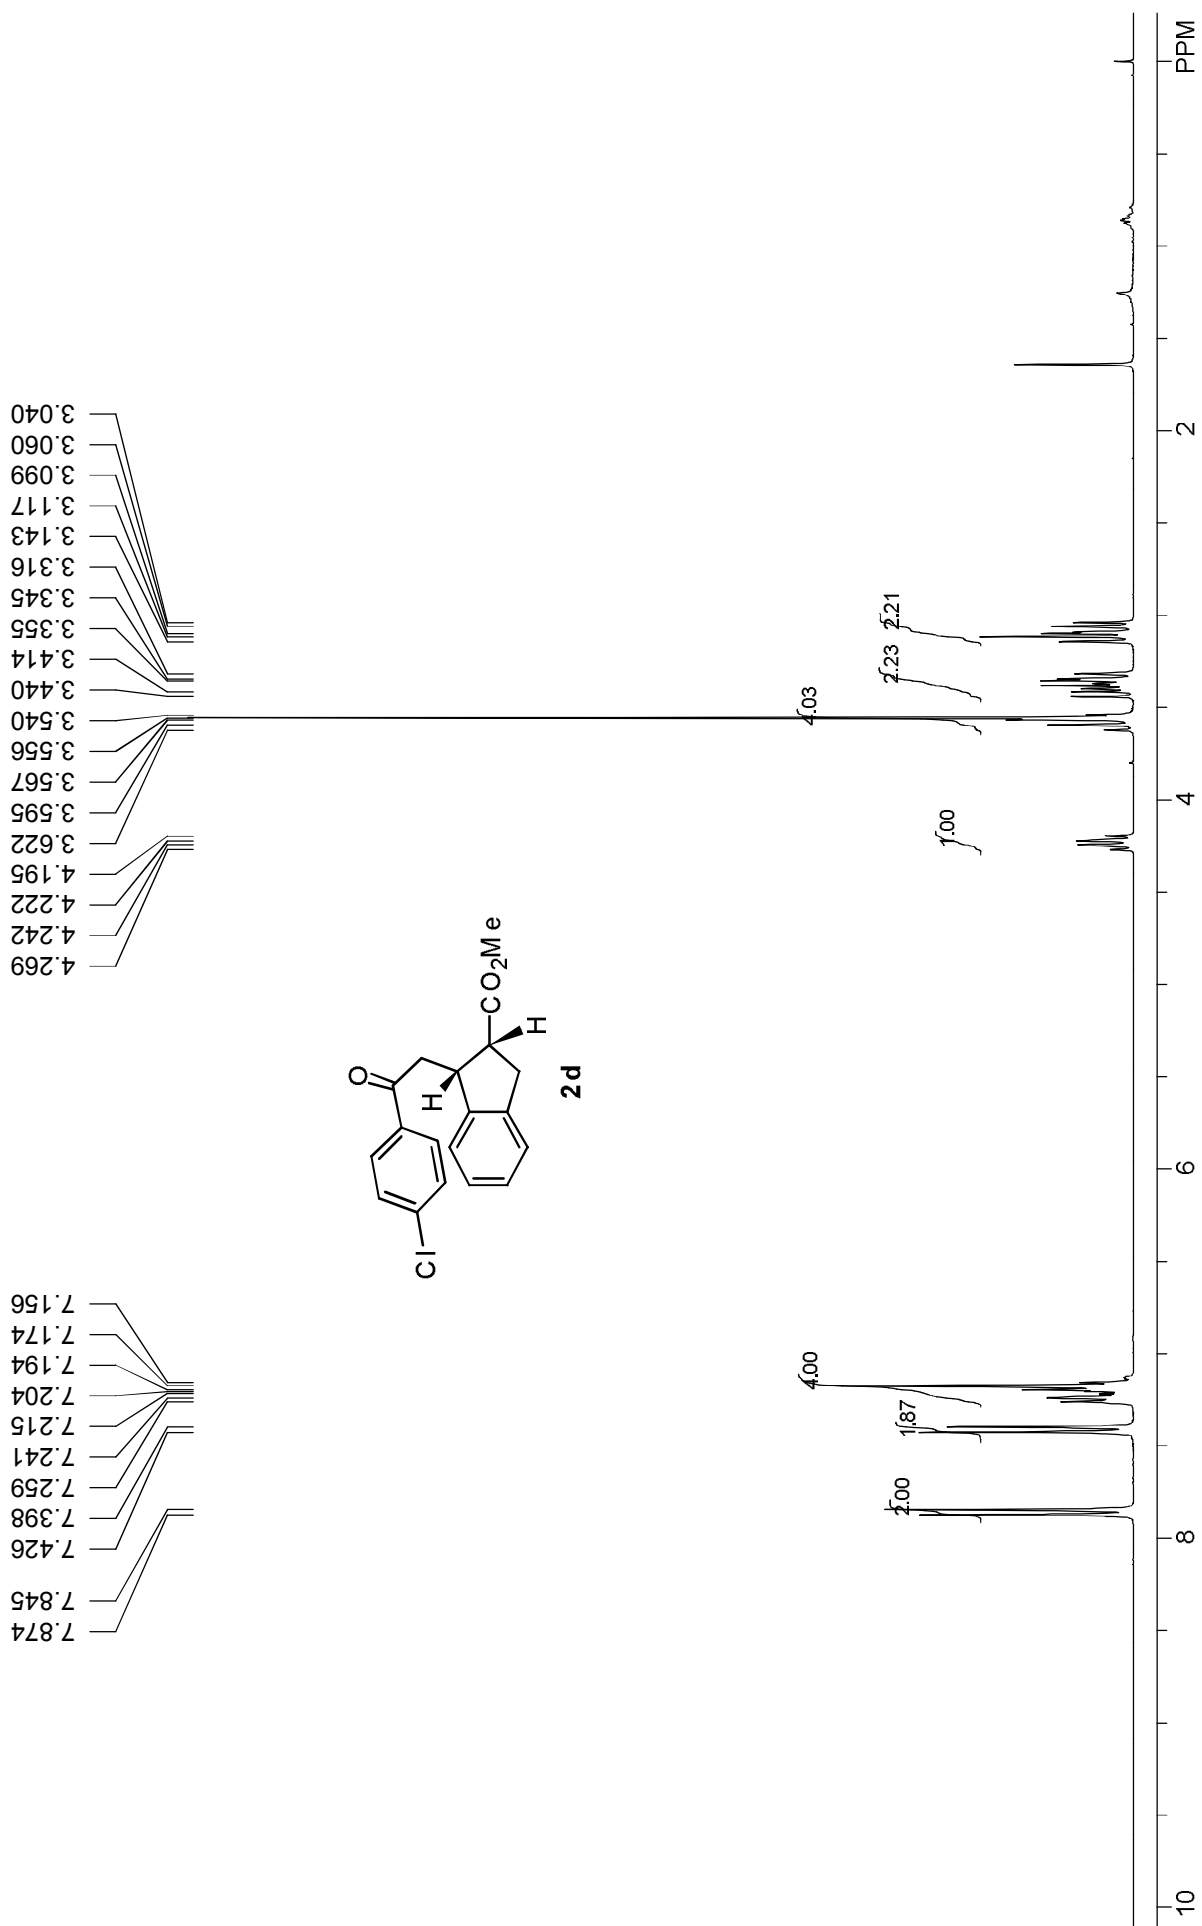

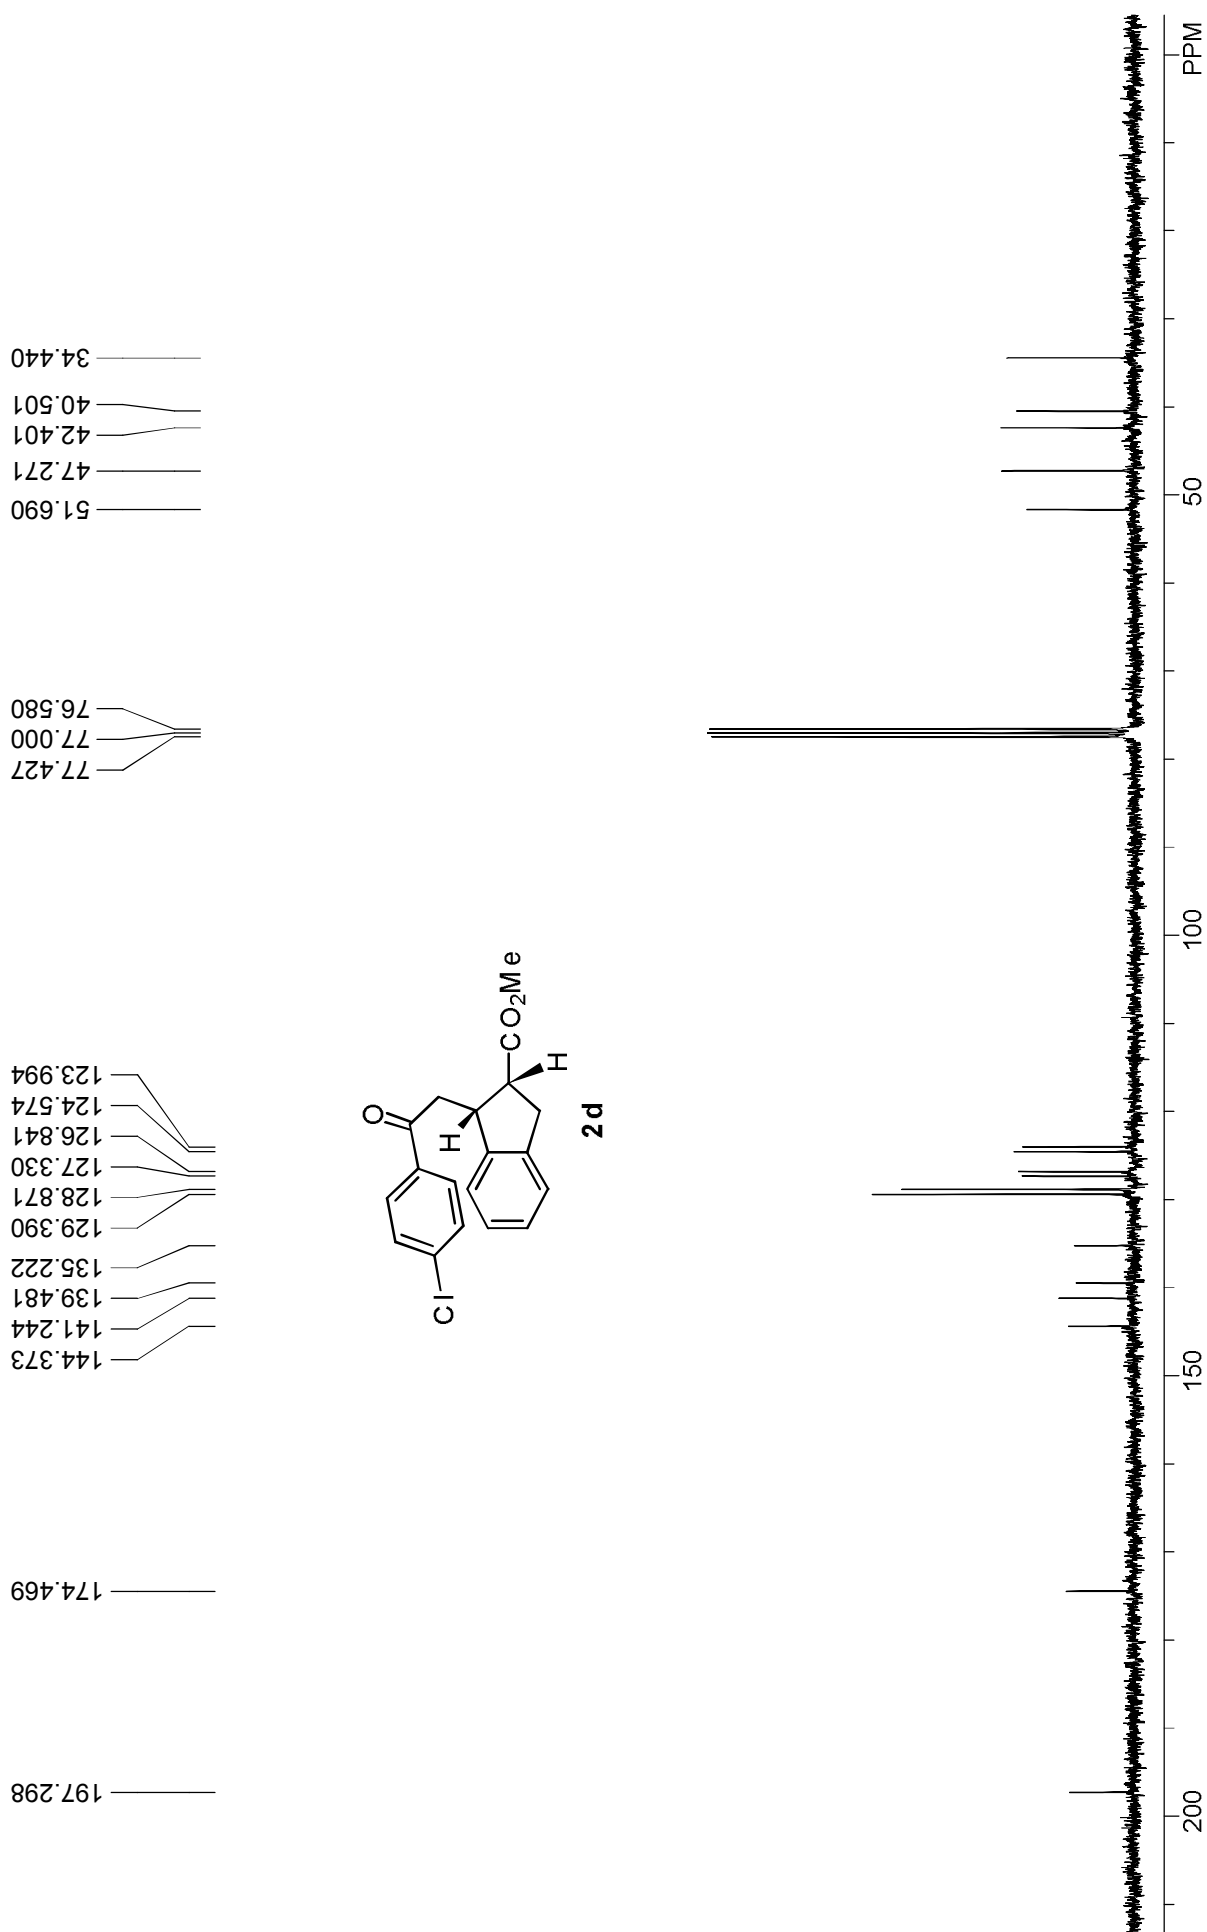

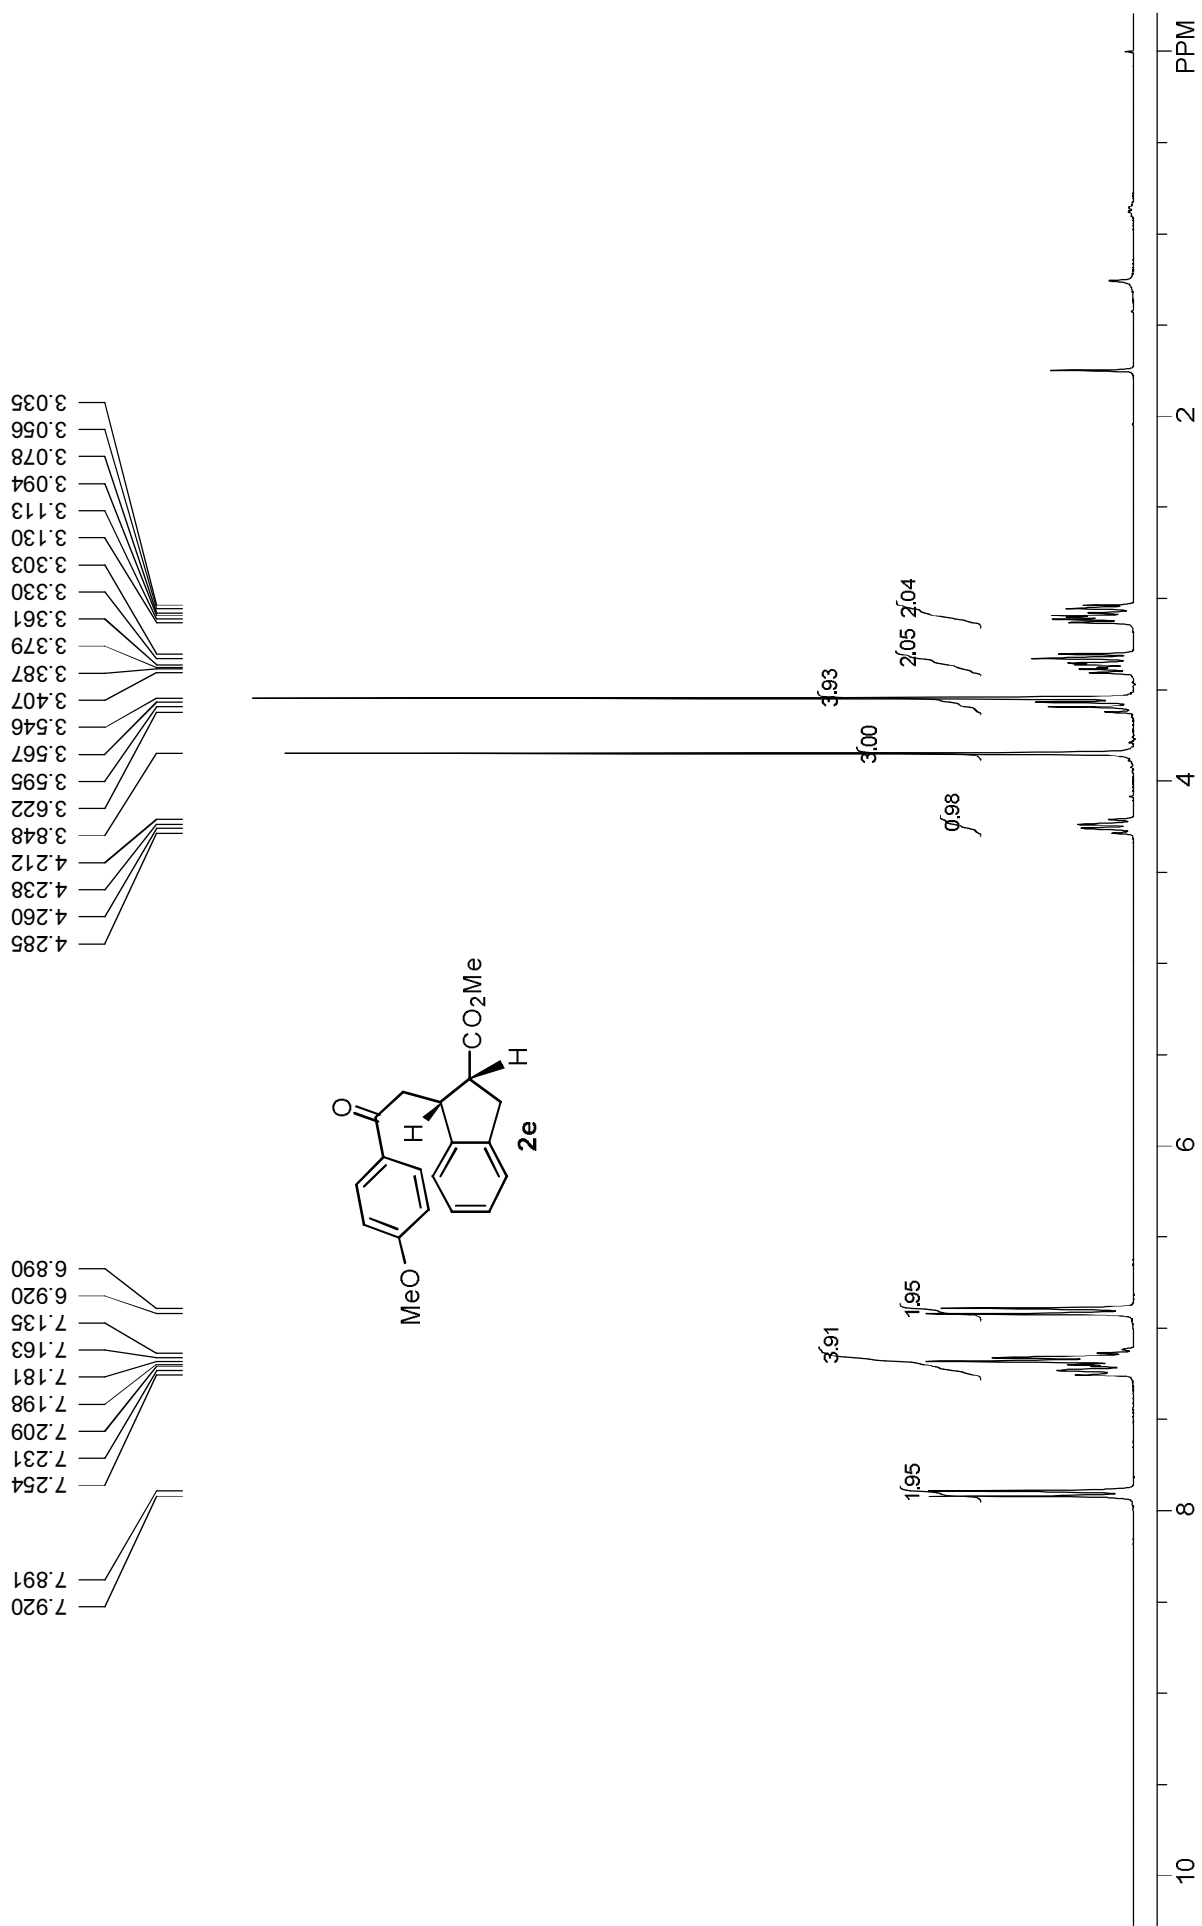



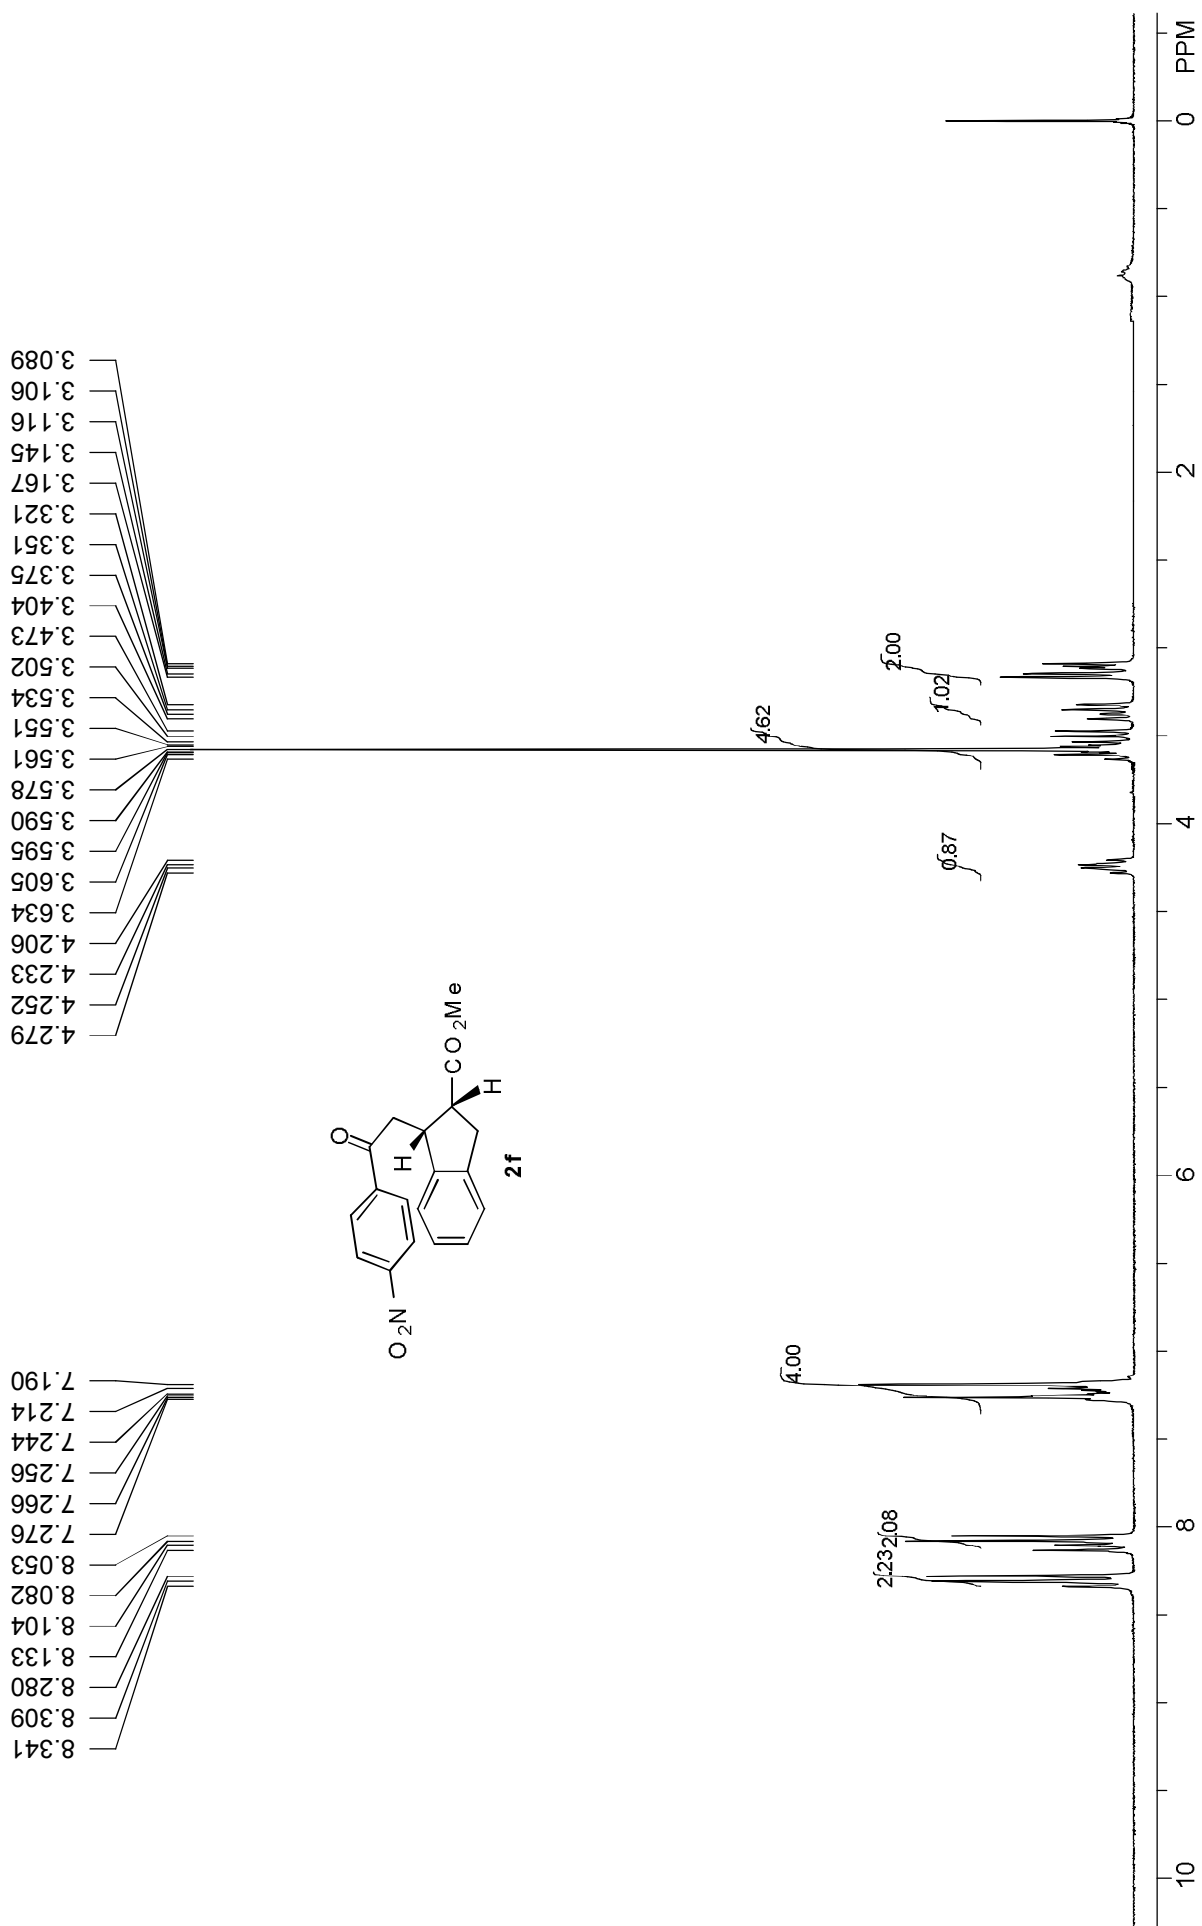

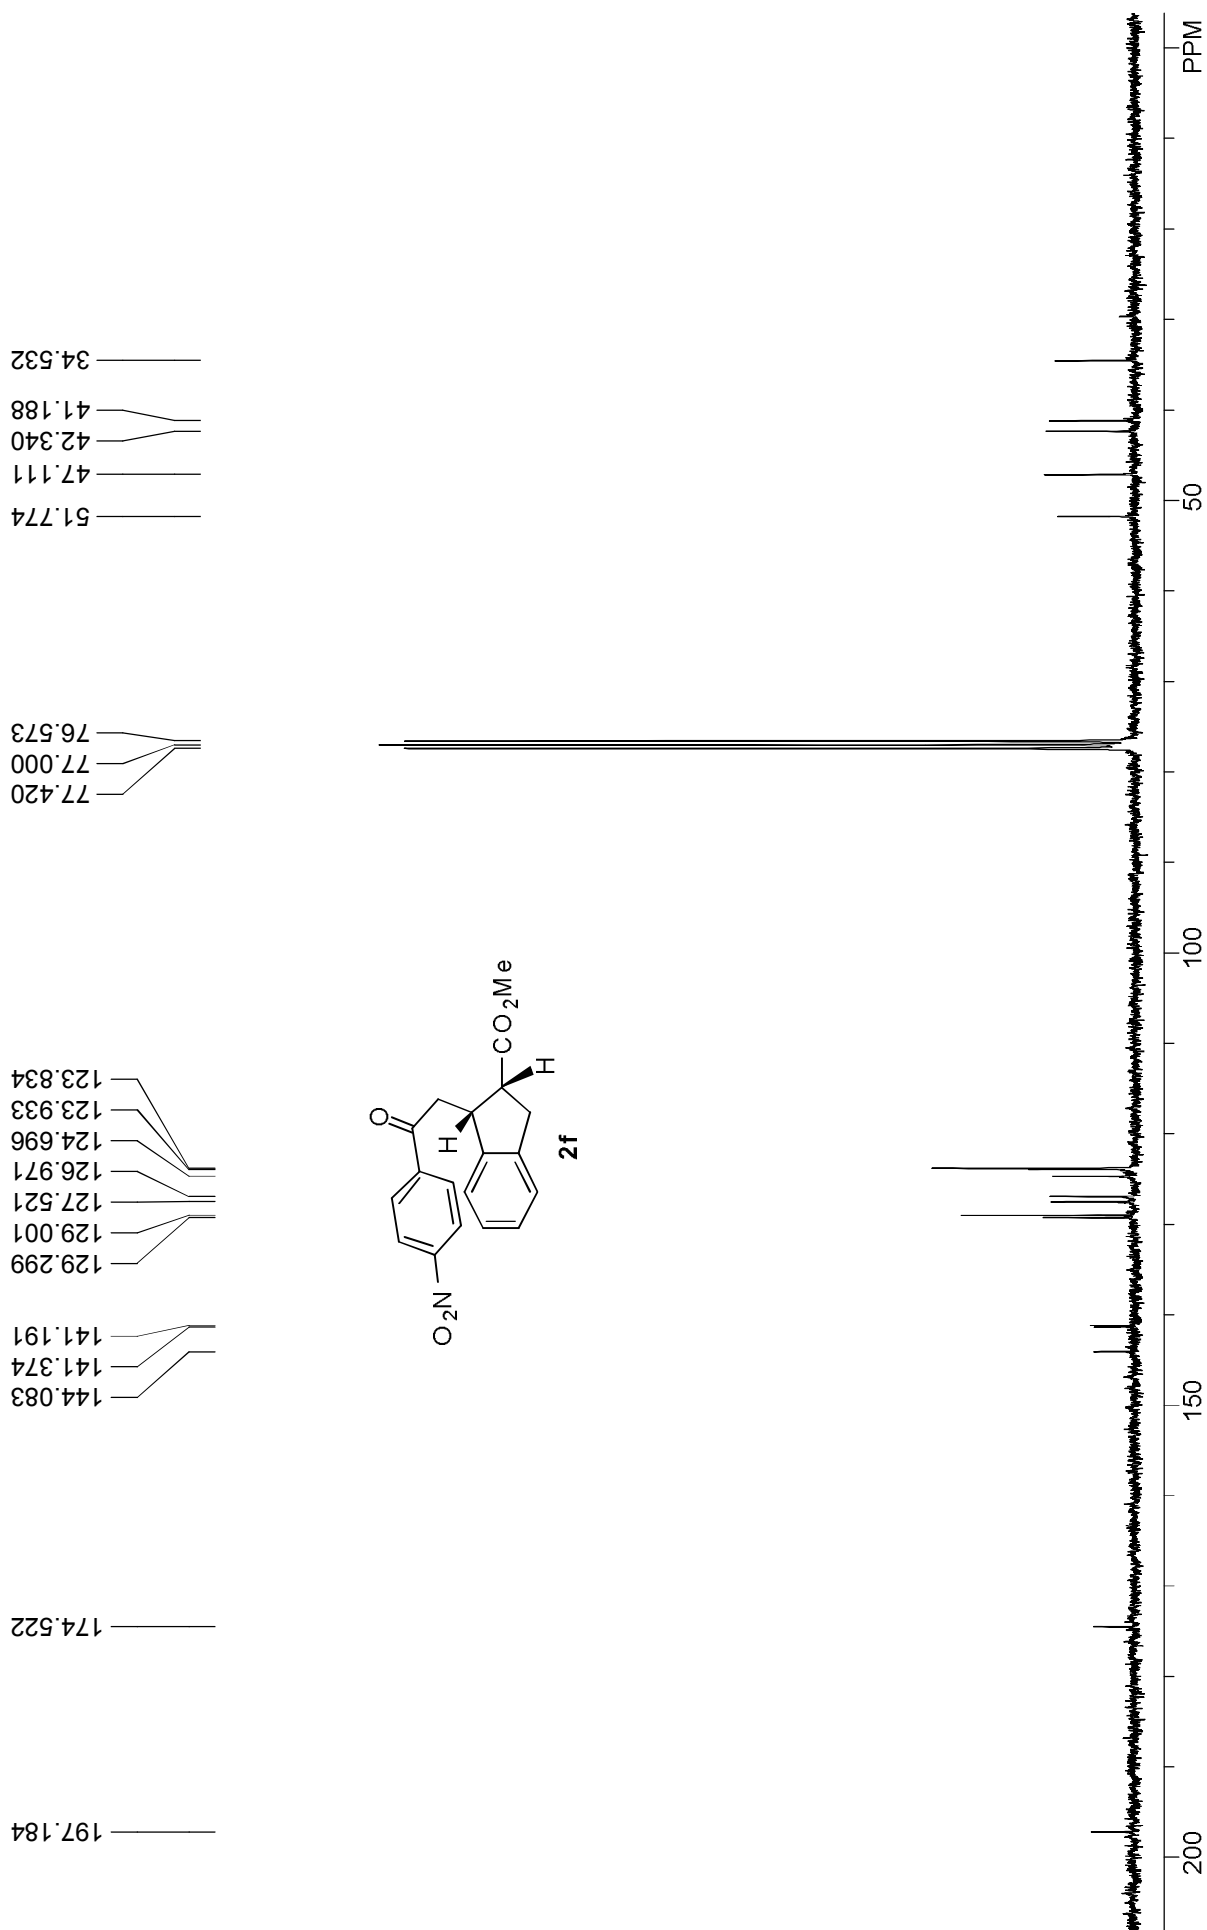

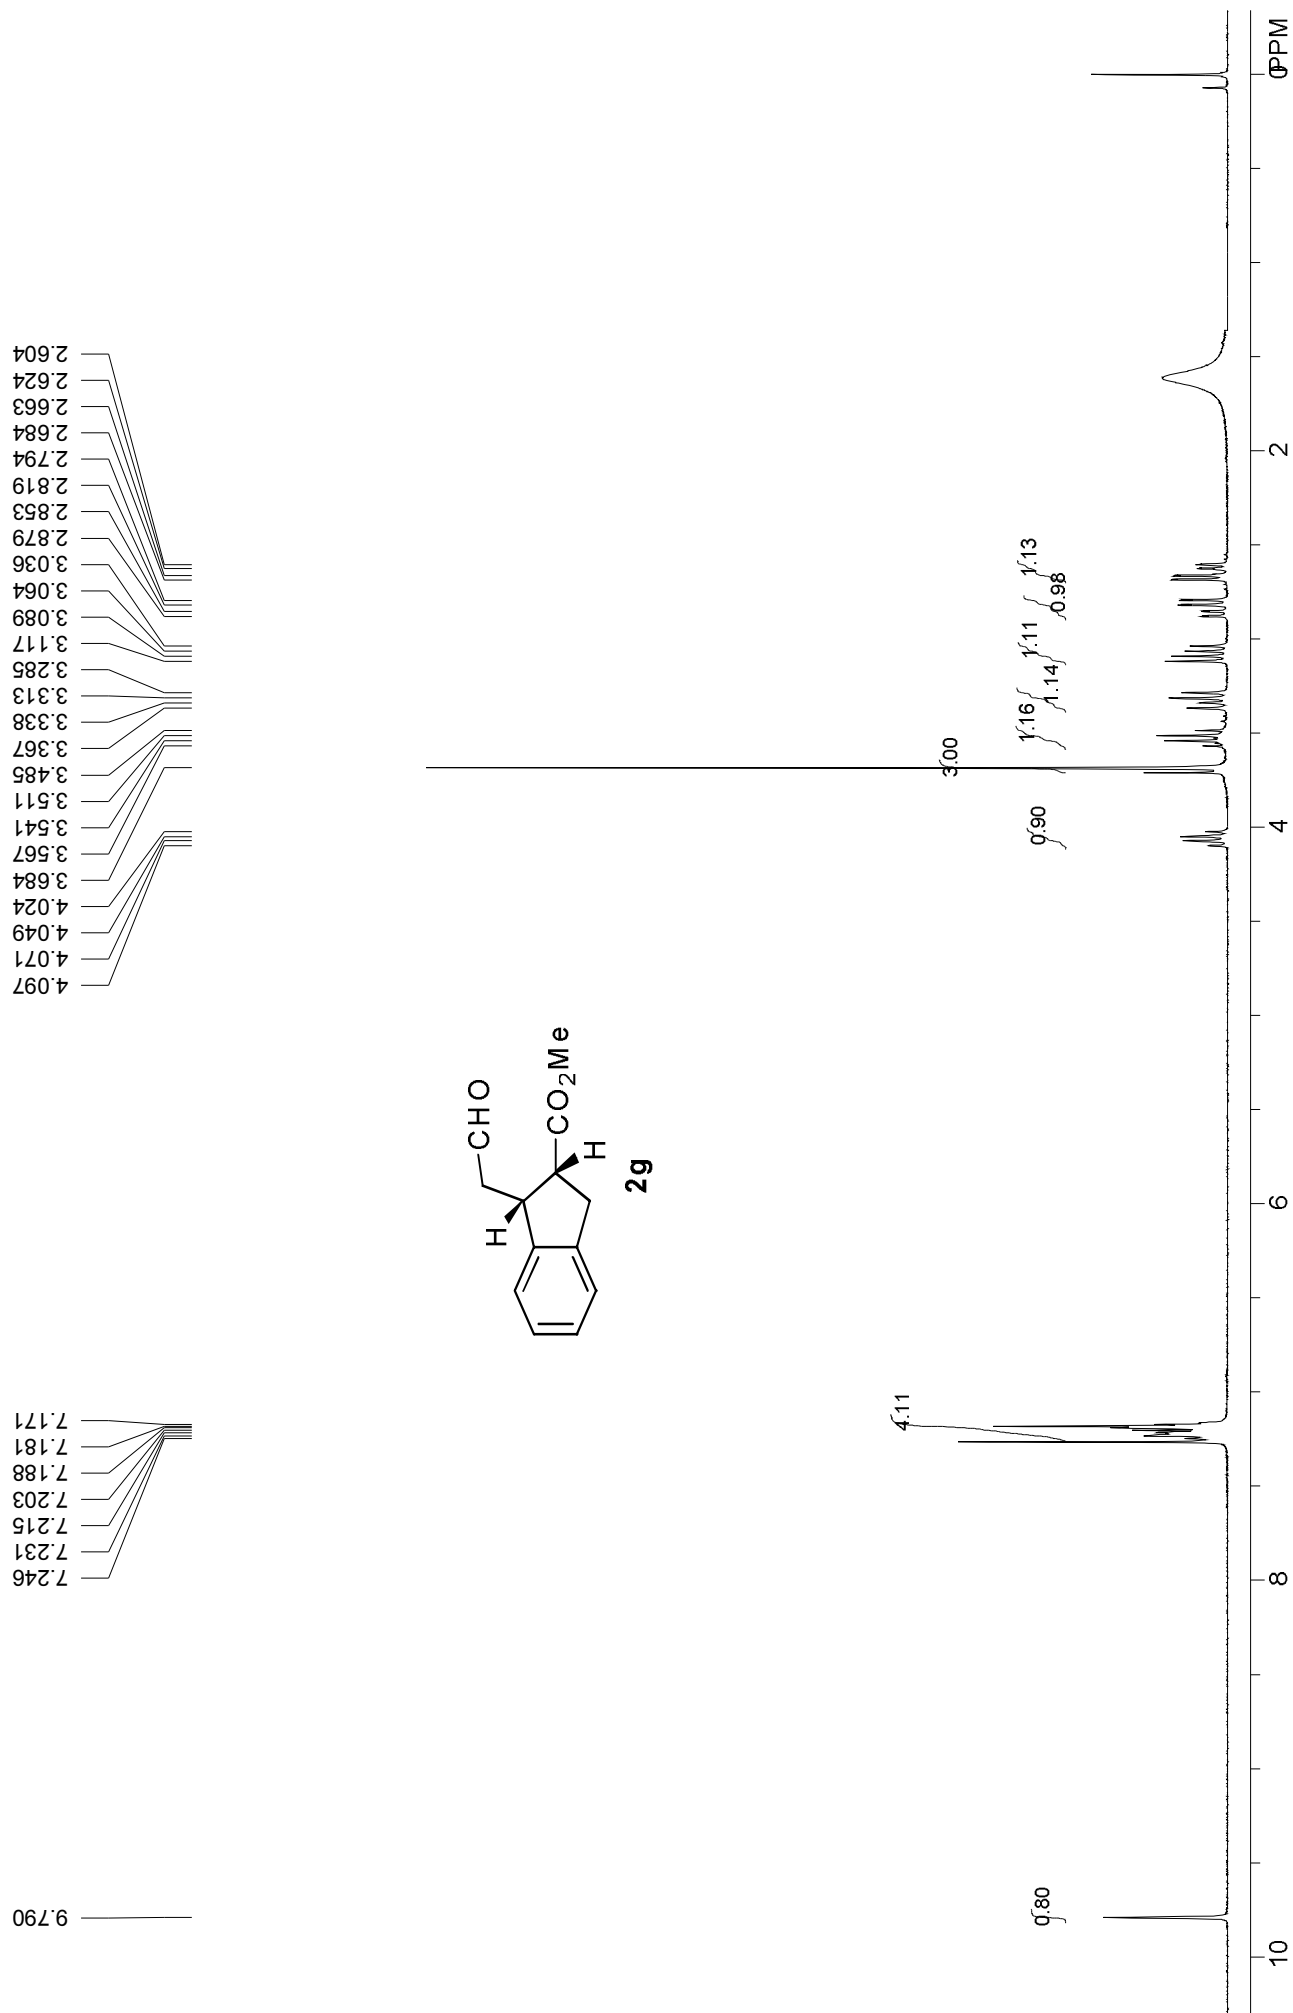

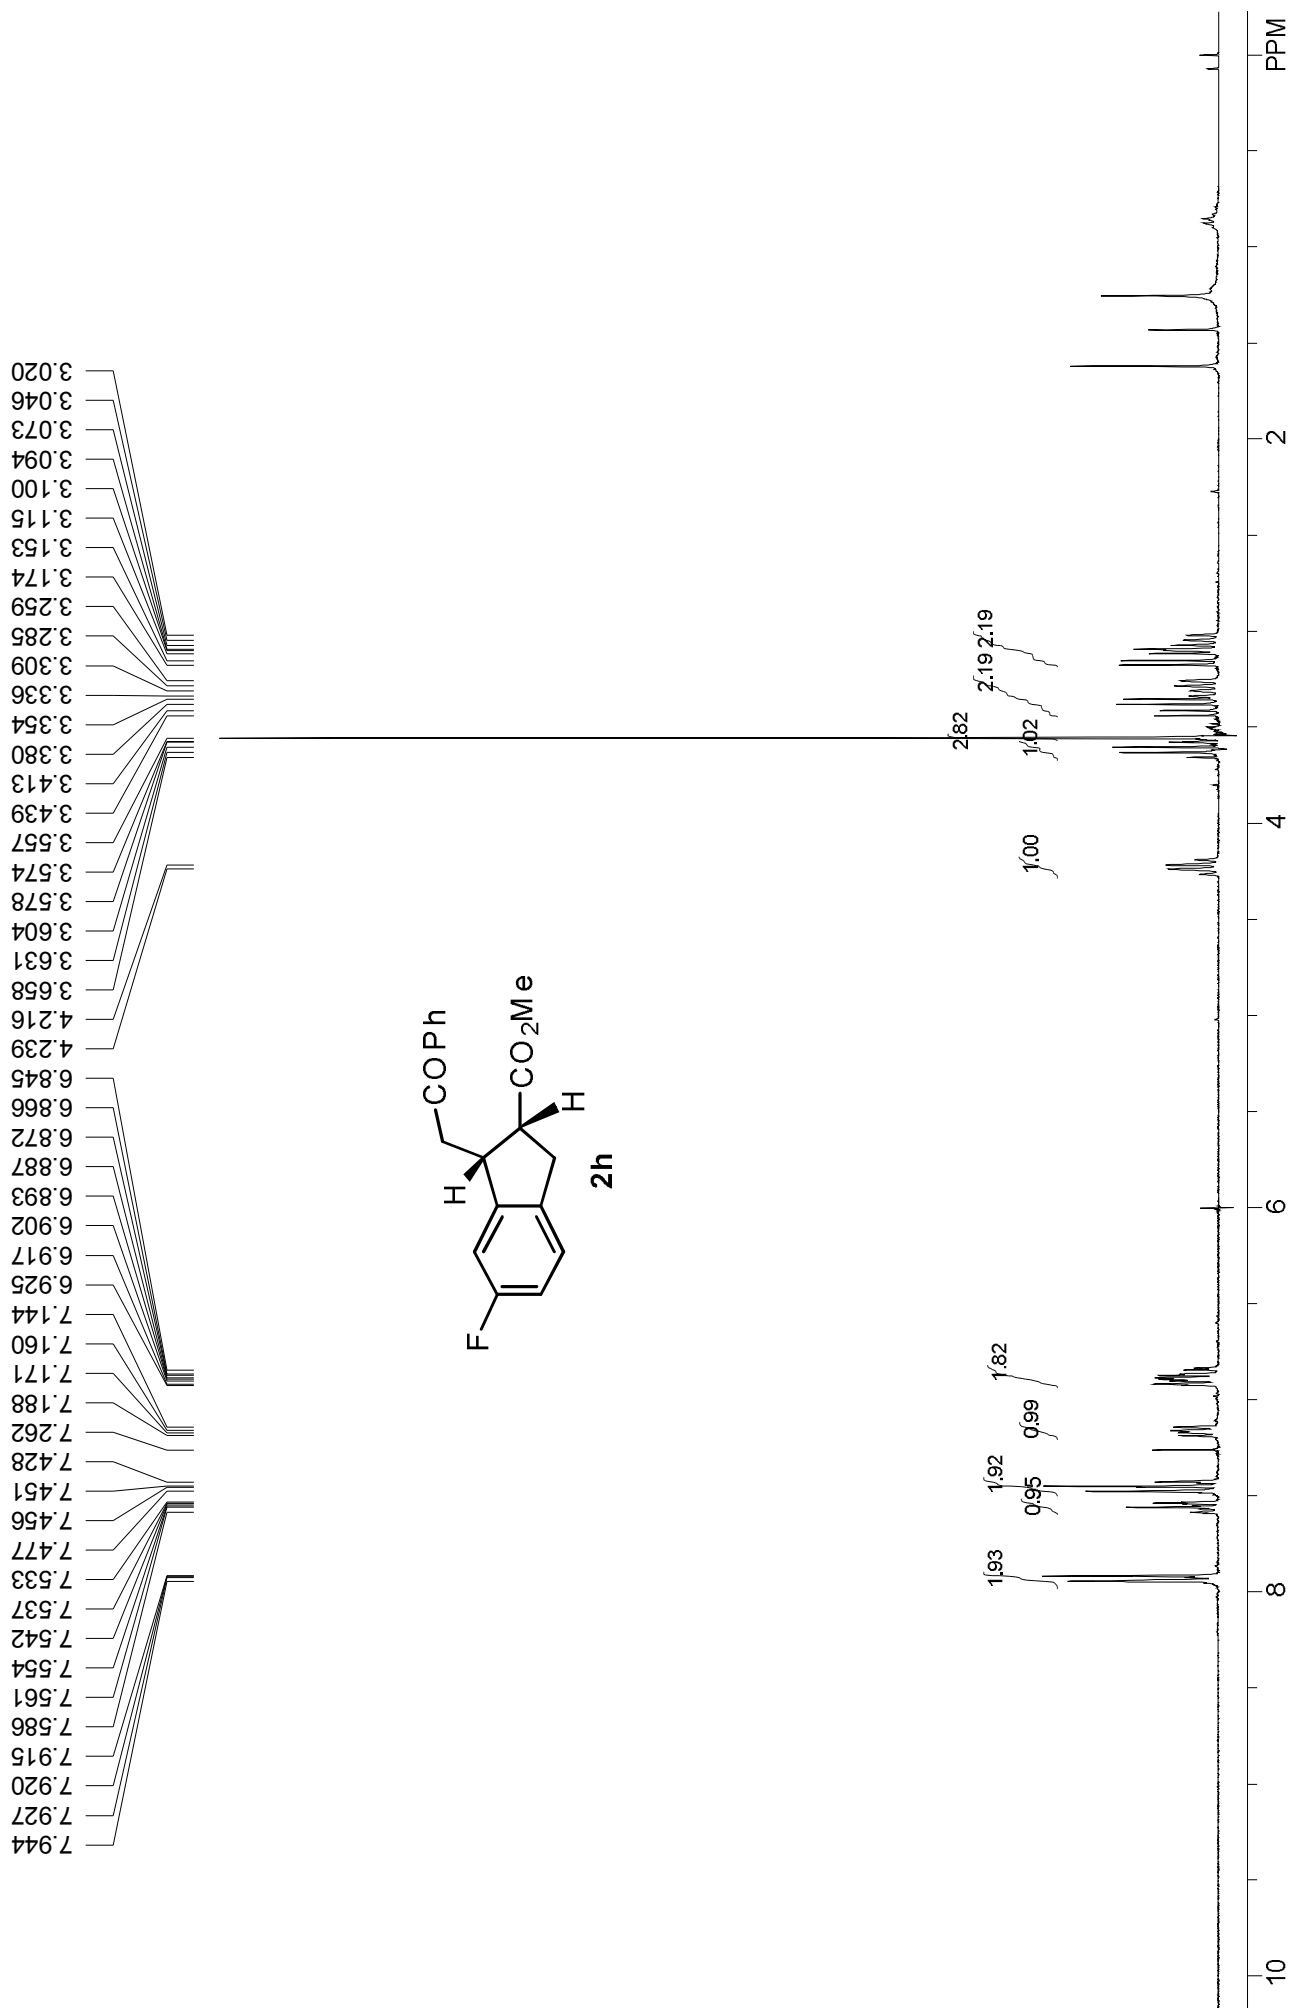

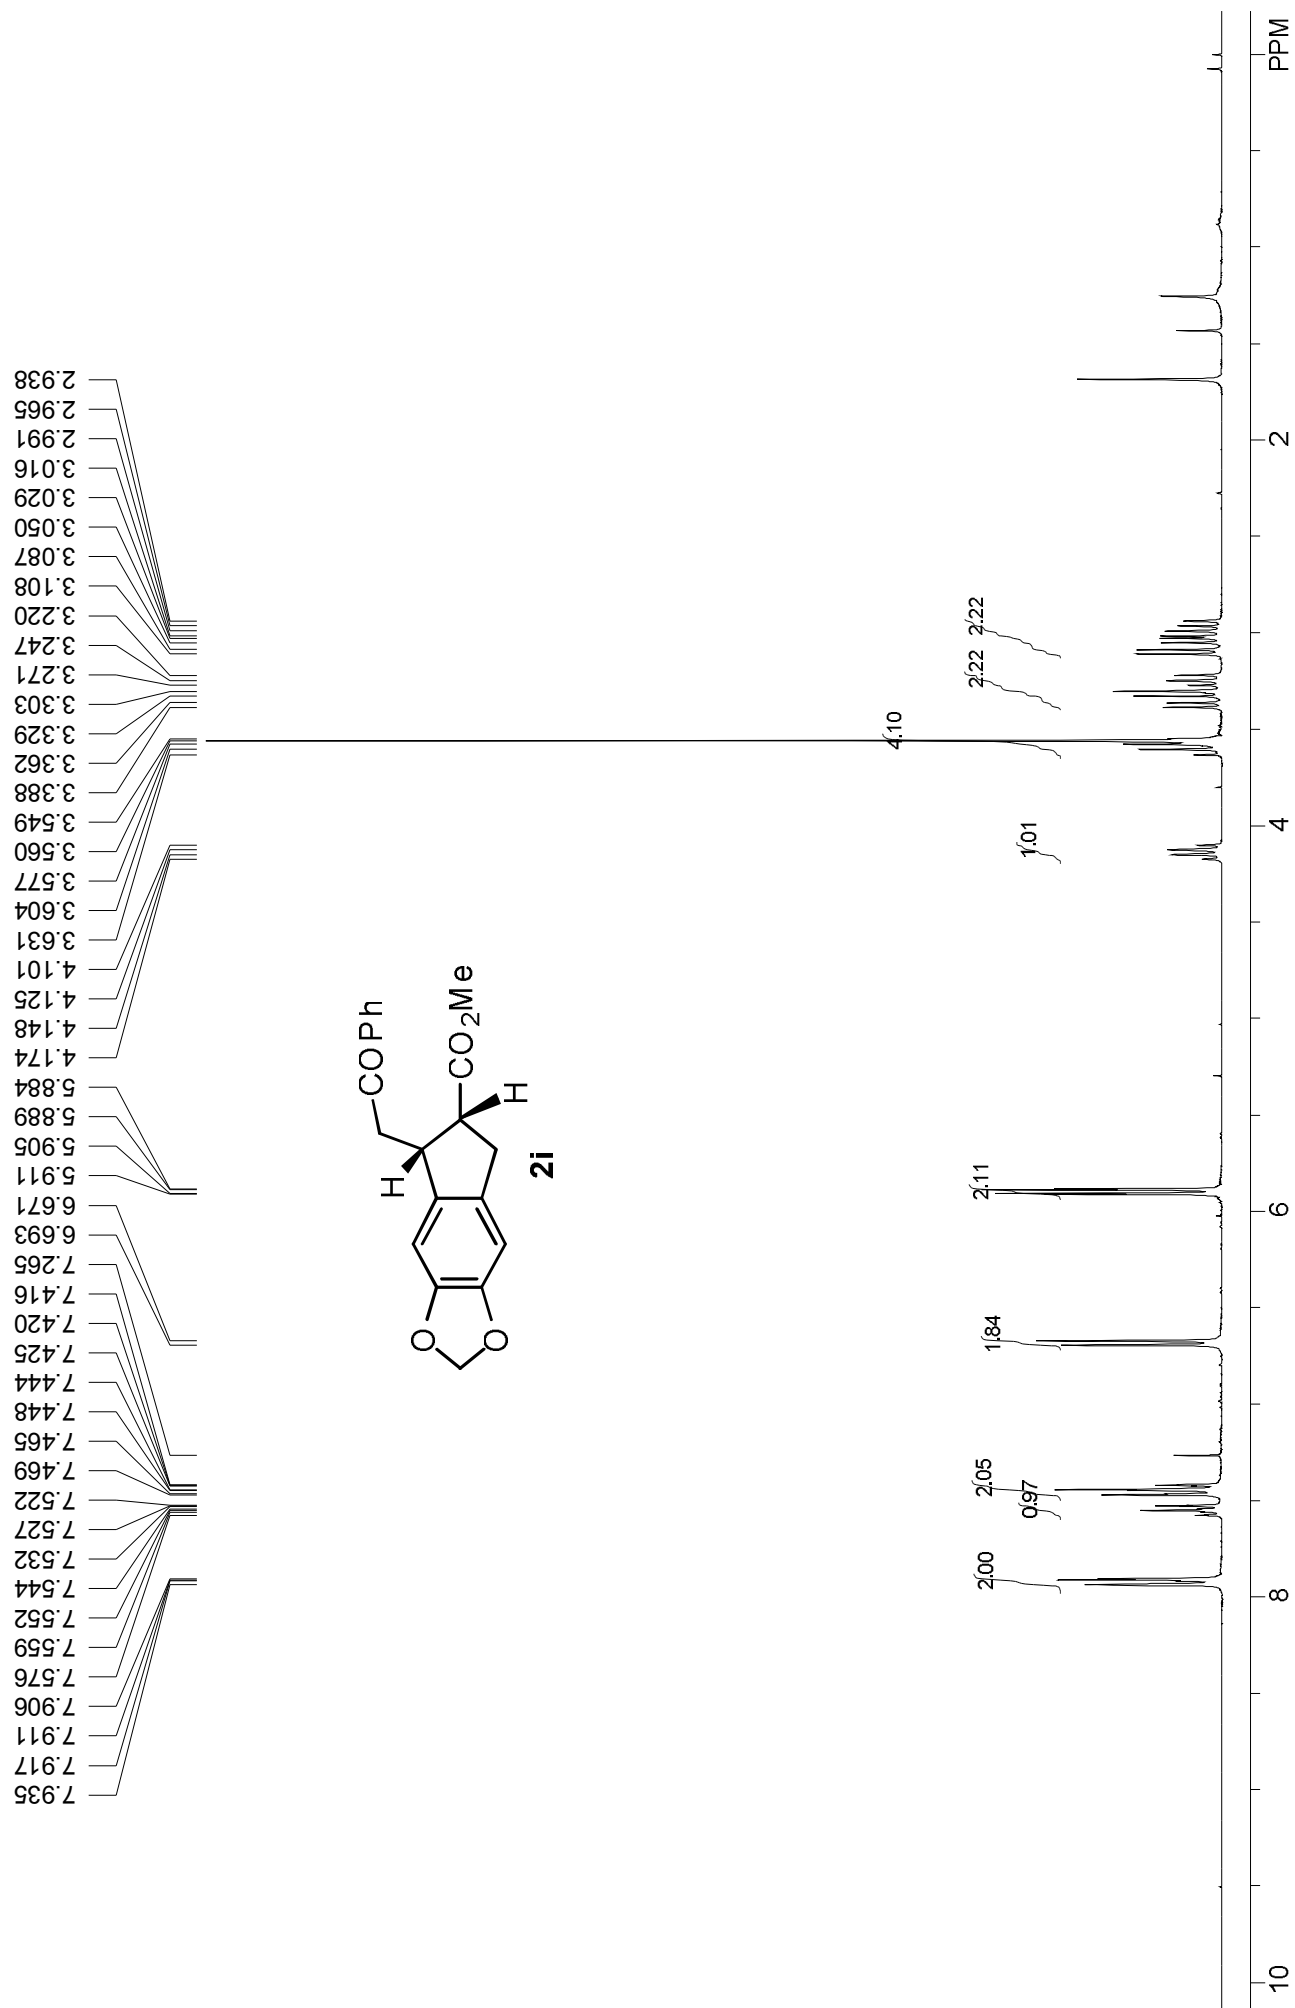

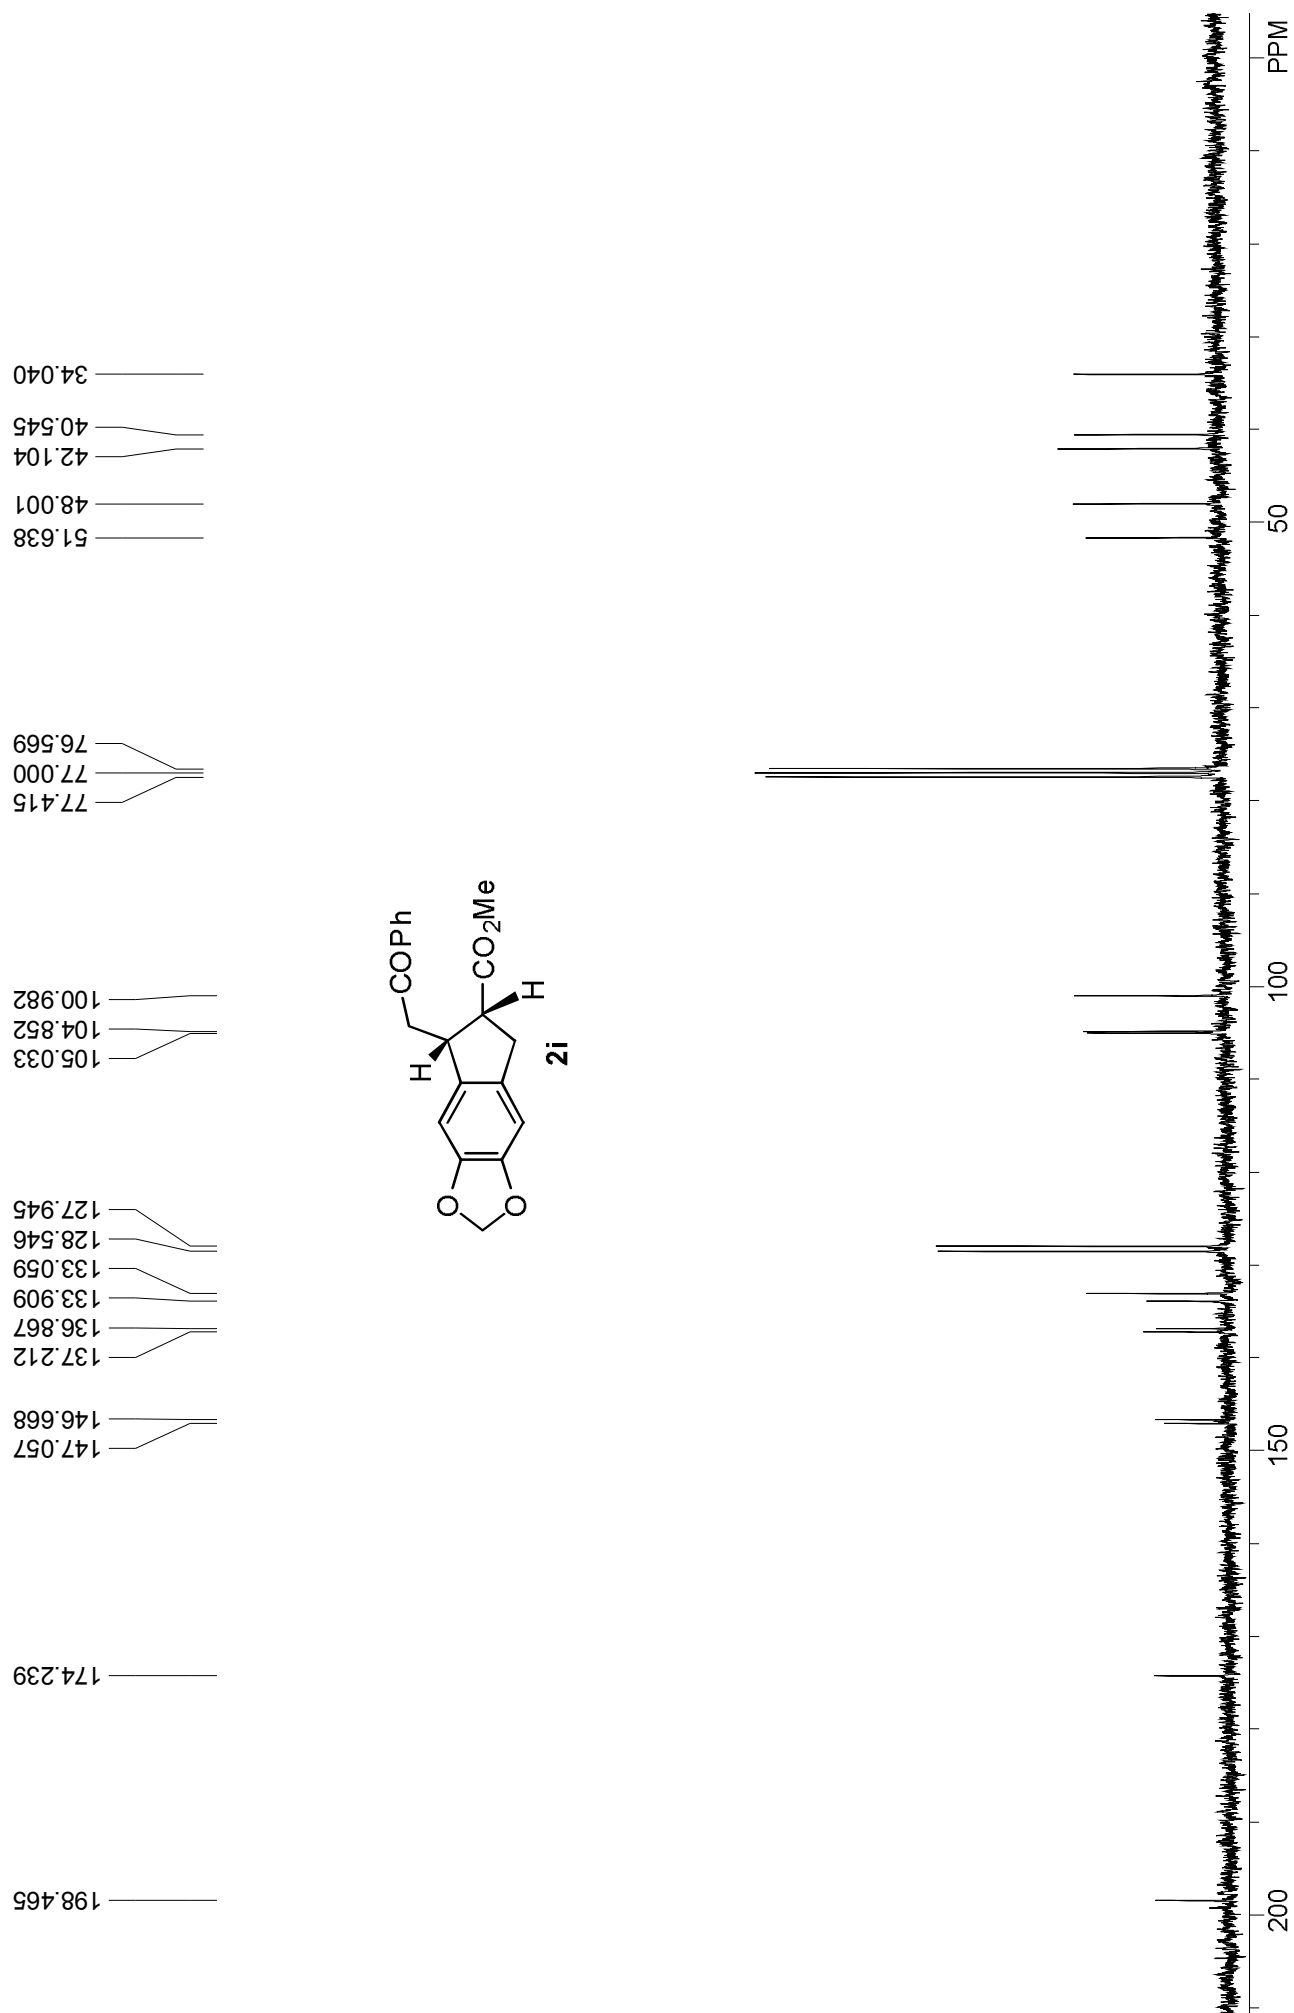

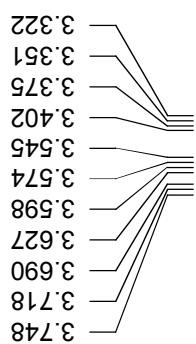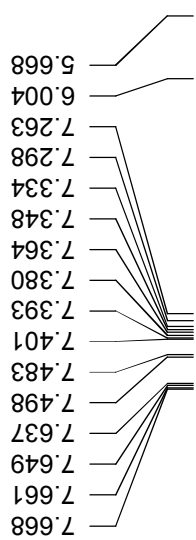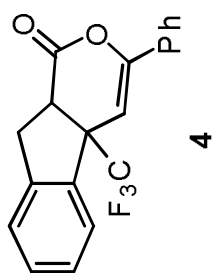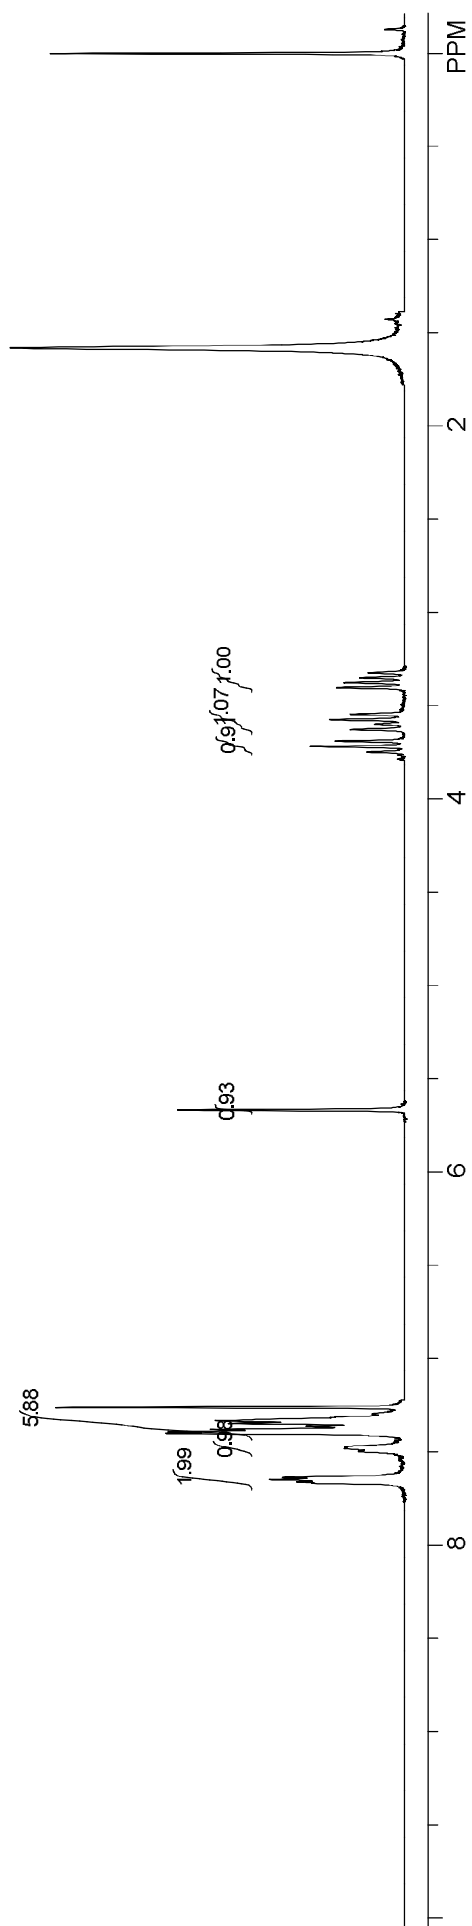

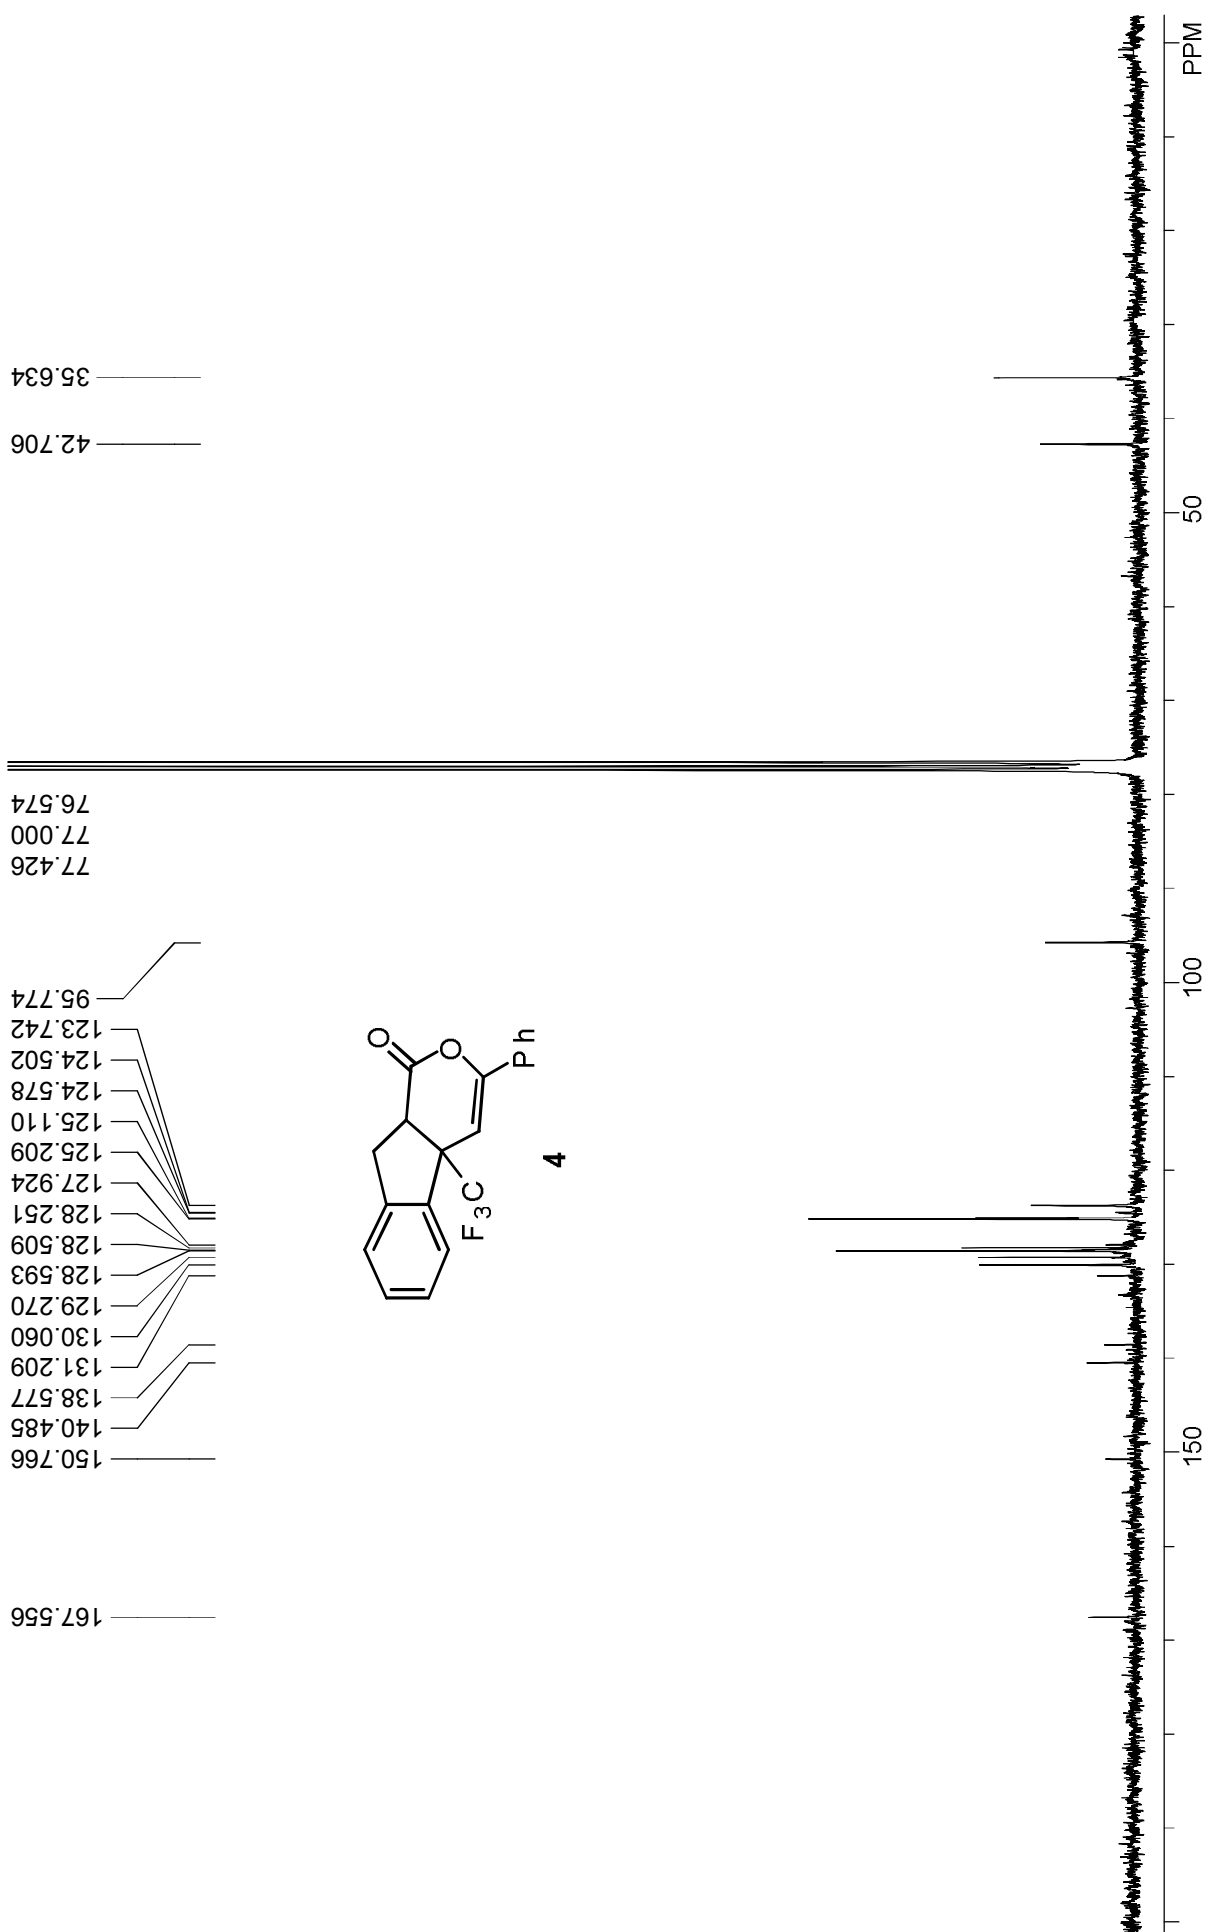



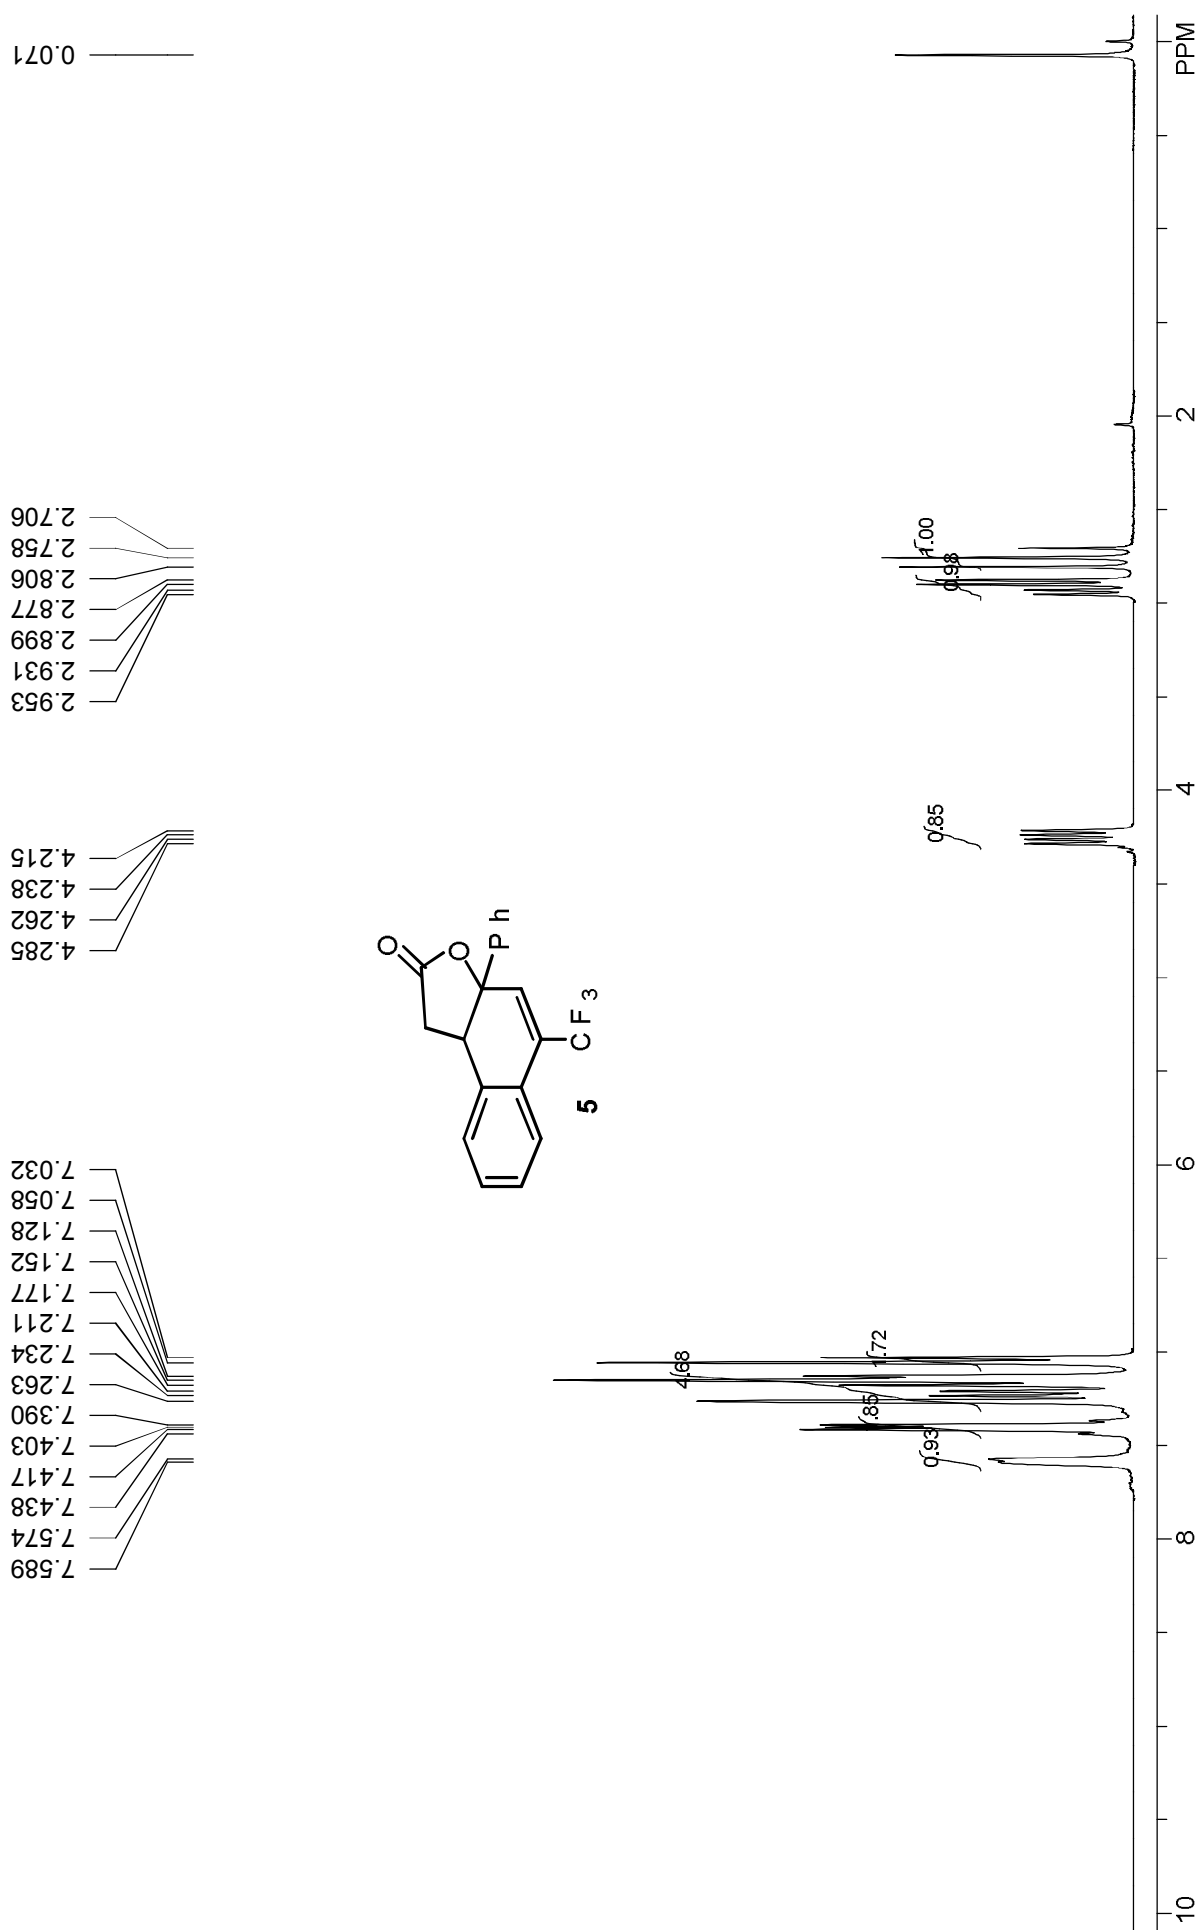

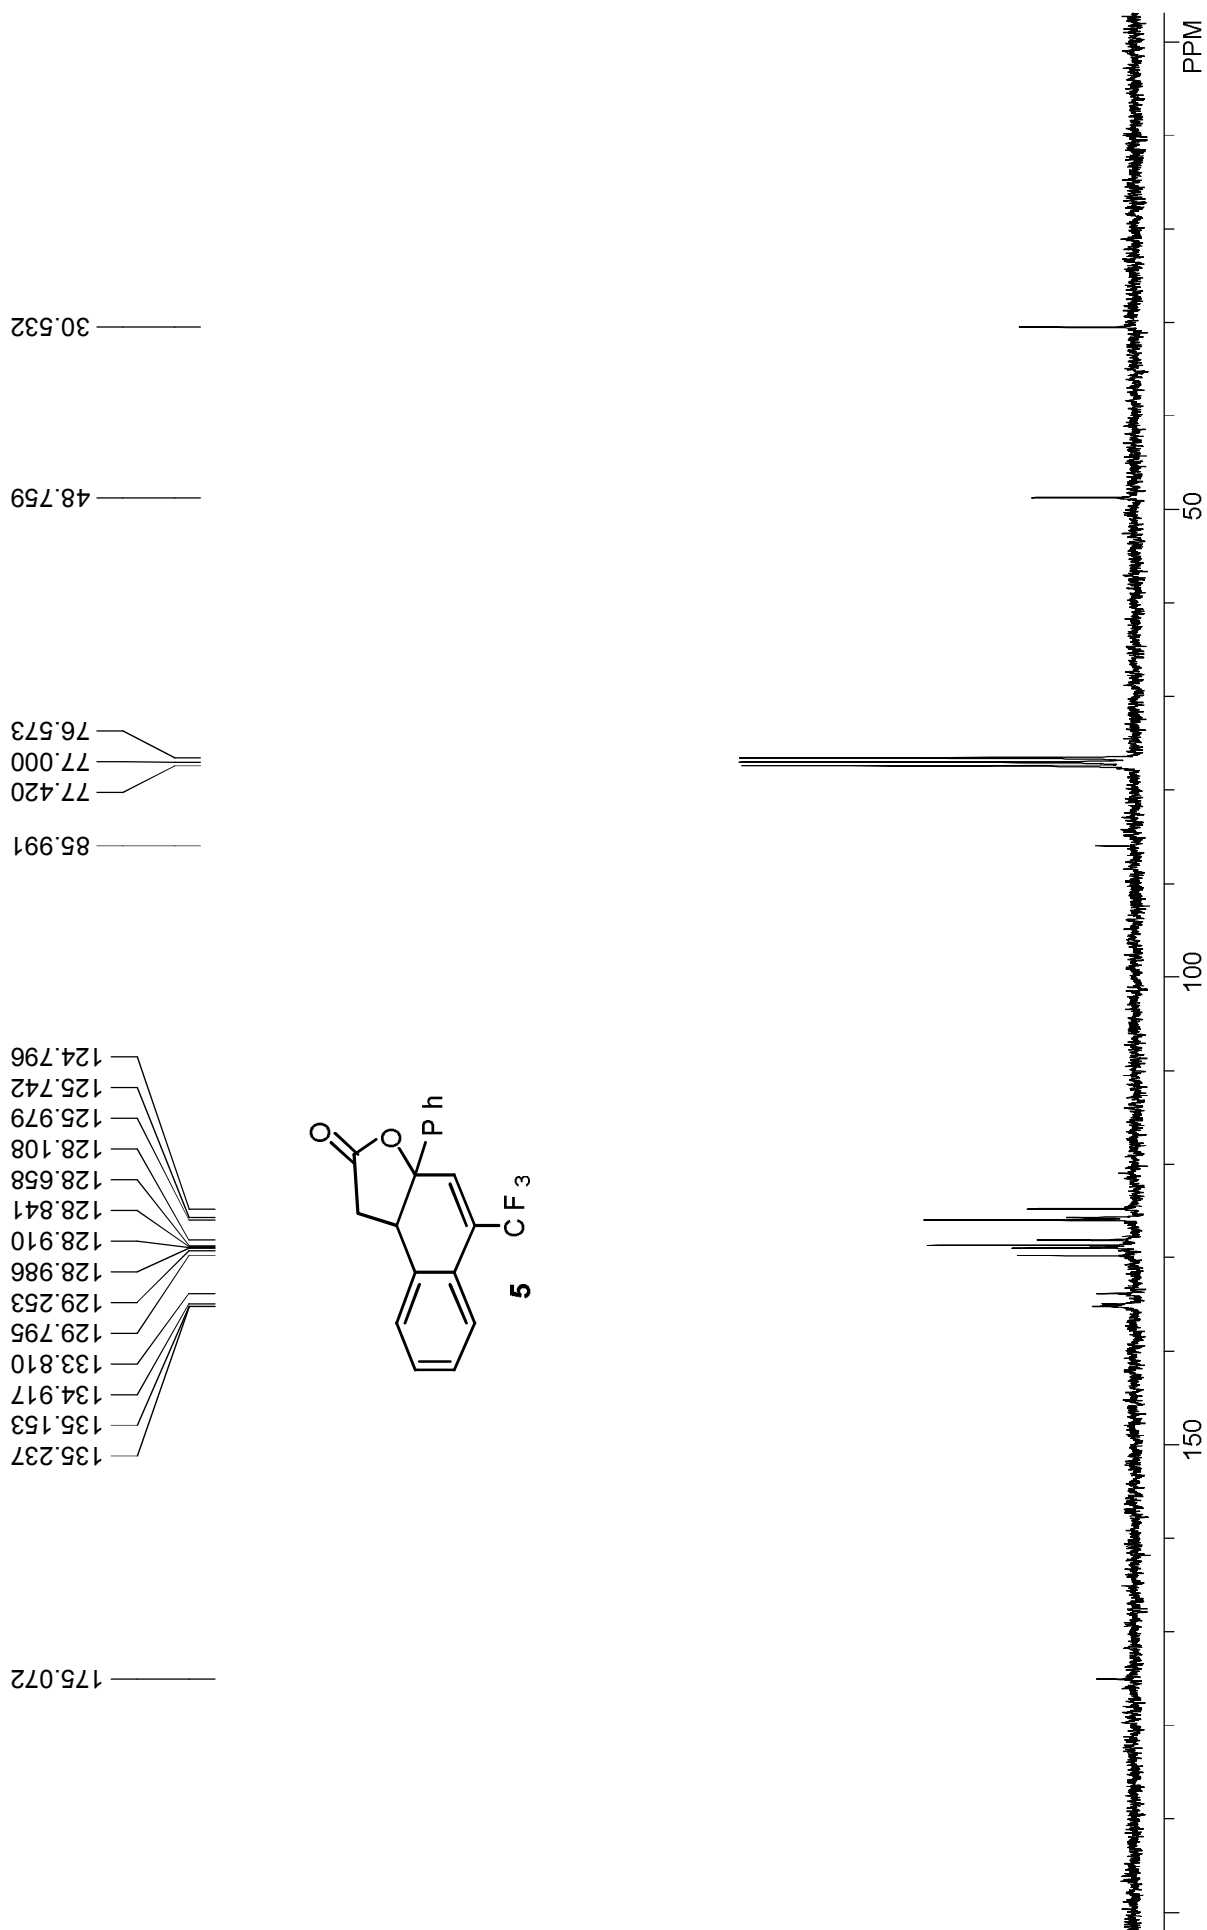

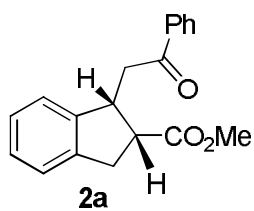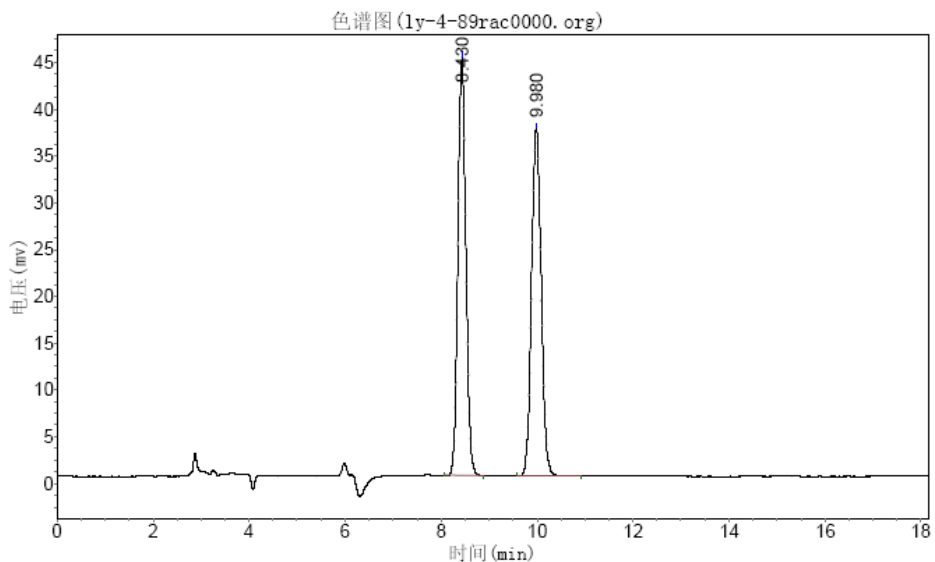

分析结果表

| 峰号 | 峰名 | 保留时间  | 峰高        | 峰面积         | 含量       |
|----|----|-------|-----------|-------------|----------|
| 1  |    | 8.430 | 44818.105 | 514639.813  | 49.7477  |
| 2  |    | 9.980 | 37208.055 | 519859.438  | 50.2523  |
| 总计 |    |       | 82026.160 | 1034499.250 | 100.0000 |

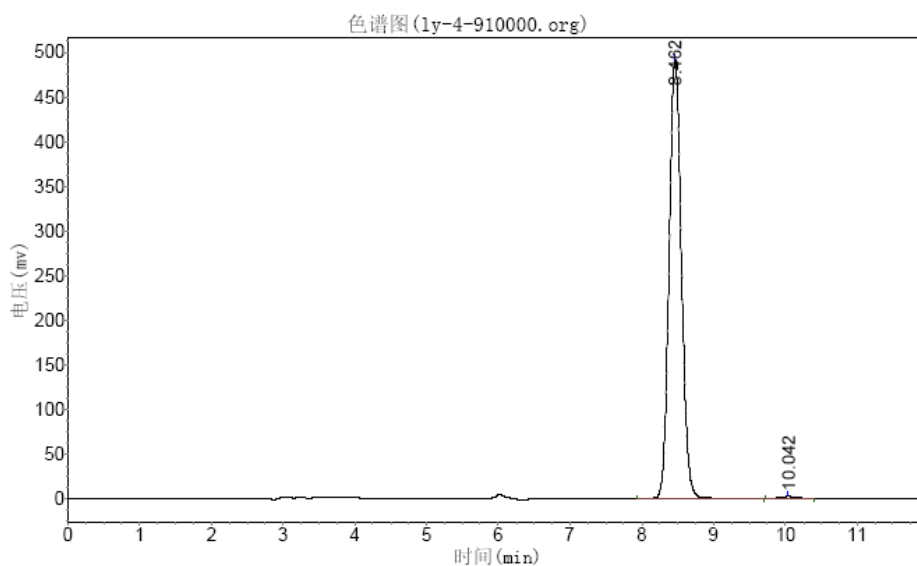

分析结果表

| 峰号 | 峰名 | 保留时间   | 峰高         | 峰面积         | 含量       |
|----|----|--------|------------|-------------|----------|
| 1  |    | 8.462  | 491685.188 | 5871702.000 | 99.4231  |
| 2  |    | 10.042 | 2391.502   | 34068.035   | 0.5769   |
| 总计 |    |        | 494076.690 | 5905770.035 | 100.0000 |

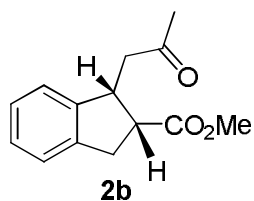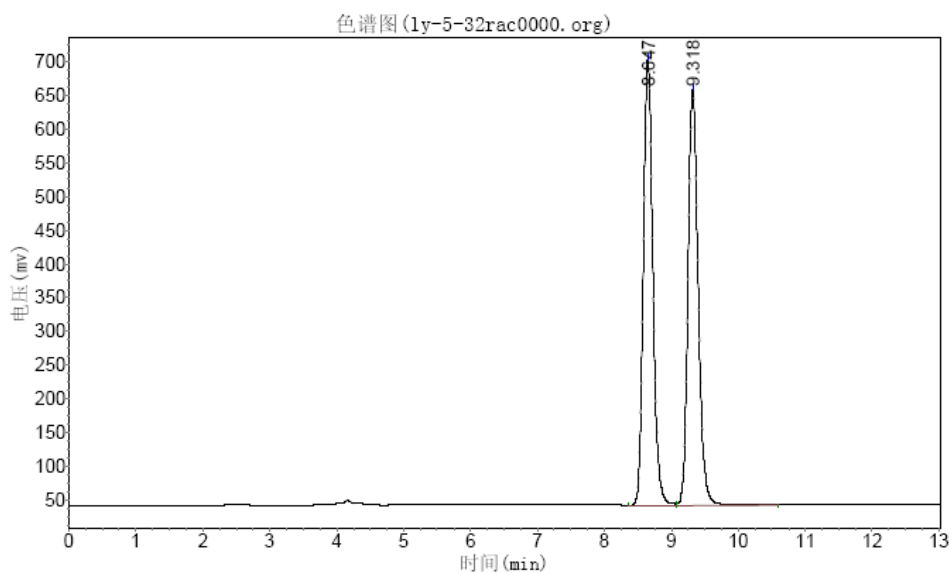

分析结果表

| 峰号 | 峰名 | 保留时间  | 峰高          | 峰面积          | 含量       |
|----|----|-------|-------------|--------------|----------|
| 1  |    | 8.647 | 661712.313  | 6535179.000  | 49.8115  |
| 2  |    | 9.318 | 617111.563  | 6584644.000  | 50.1885  |
| 总计 |    |       | 1278823.875 | 13119823.000 | 100.0000 |

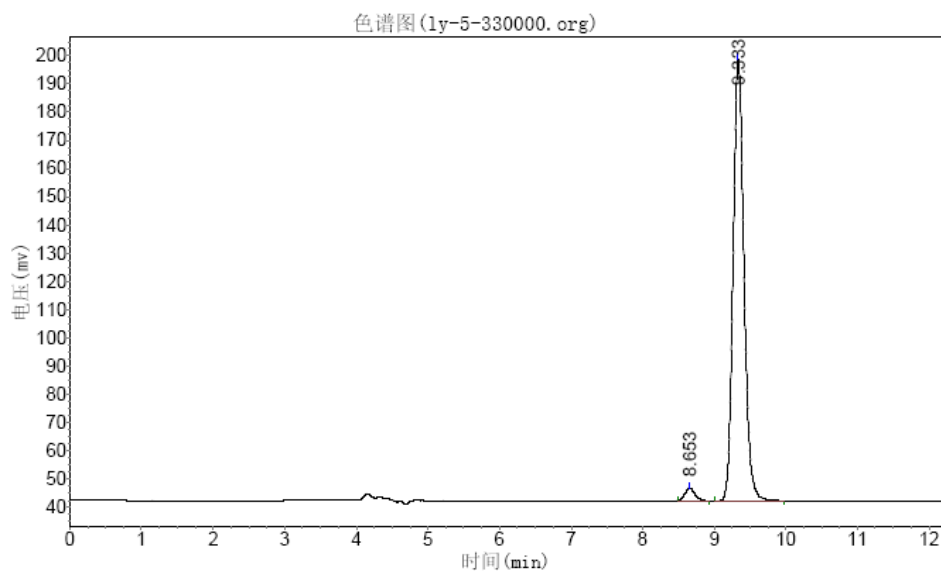

分析结果表

| 峰号 | 峰名 | 保留时间  | 峰高         | 峰面积         | 含量       |
|----|----|-------|------------|-------------|----------|
| 1  |    | 8.653 | 4522.123   | 42801.813   | 2.5430   |
| 2  |    | 9.333 | 156544.703 | 1640341.375 | 97.4570  |
| 总计 |    |       | 161066.826 | 1683143.188 | 100.0000 |

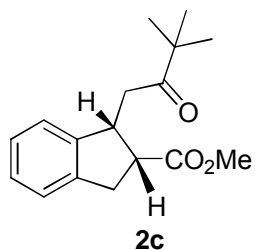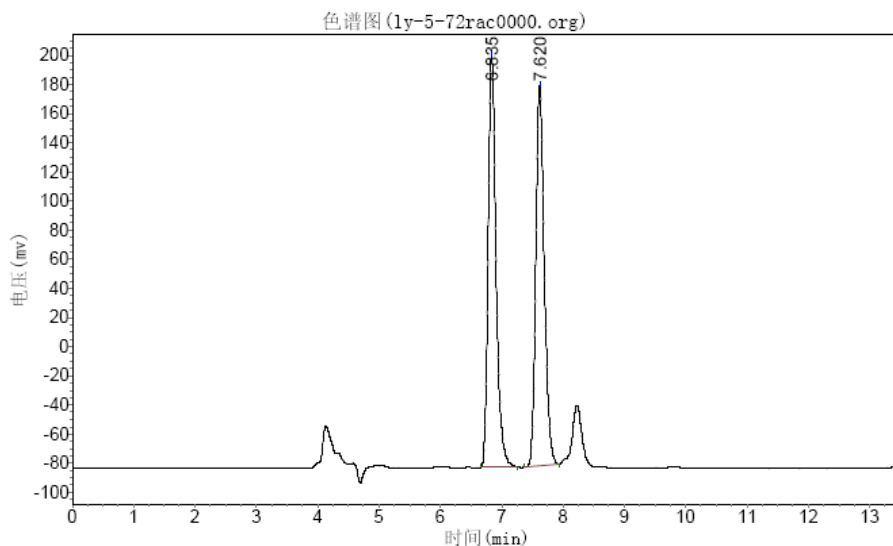

分析结果表

| 峰号 | 峰名 | 保留时间  | 峰高         | 峰面积         | 含量       |
|----|----|-------|------------|-------------|----------|
| 1  |    | 6.835 | 282731.719 | 2530608.500 | 50.4016  |
| 2  |    | 7.620 | 260645.359 | 2490283.000 | 49.5984  |
| 总计 |    |       | 543377.078 | 5020891.500 | 100.0000 |

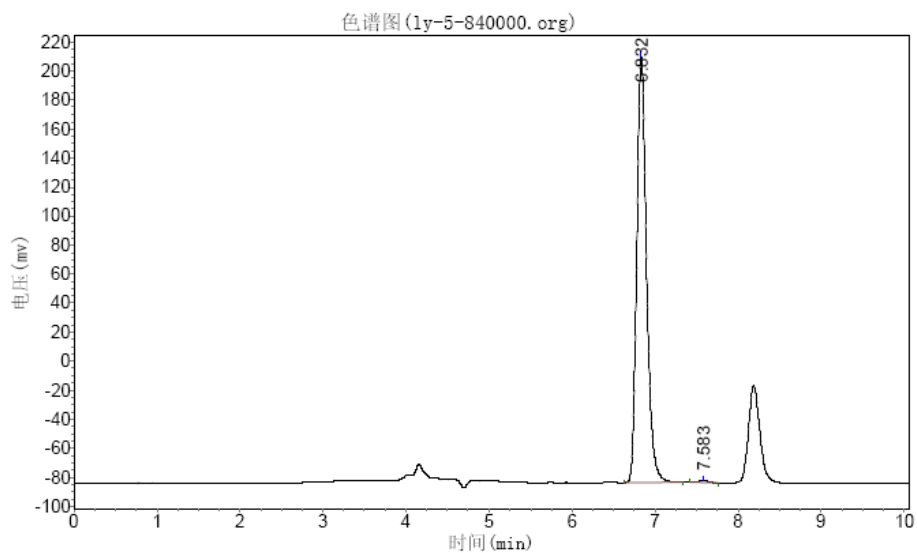

分析结果表

| 峰号 | 峰名 | 保留时间  | 峰高         | 峰面积         | 含量       |
|----|----|-------|------------|-------------|----------|
| 1  |    | 6.832 | 293569.469 | 2410854.500 | 99.5605  |
| 2  |    | 7.583 | 1281.294   | 10642.992   | 0.4395   |
| 总计 |    |       | 294850.763 | 2421497.492 | 100.0000 |

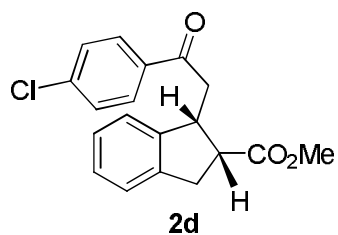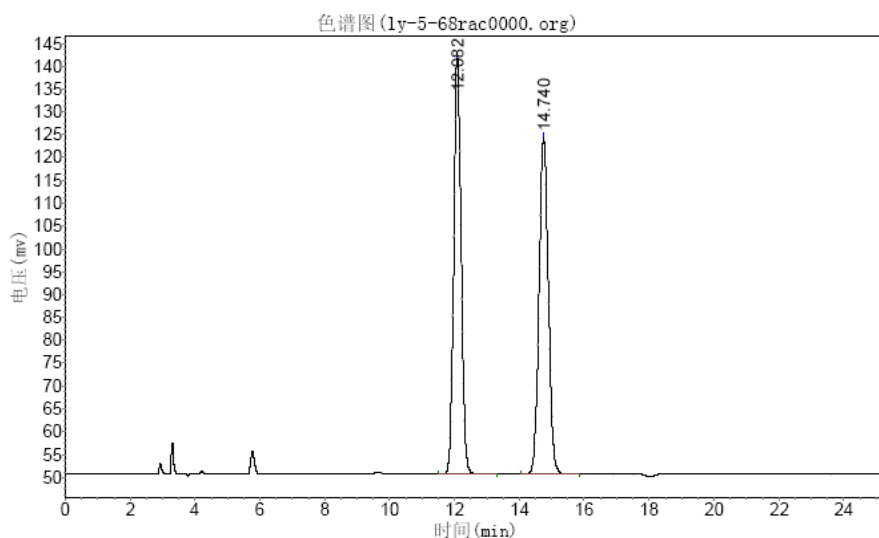

分析结果表

| 峰号 | 峰名 | 保留时间   | 峰高         | 峰面积         | 含量       |
|----|----|--------|------------|-------------|----------|
| 1  |    | 12.082 | 91373.094  | 1462822.625 | 49.9597  |
| 2  |    | 14.740 | 73879.477  | 1465183.125 | 50.0403  |
| 总计 |    |        | 165252.570 | 2928005.750 | 100.0000 |

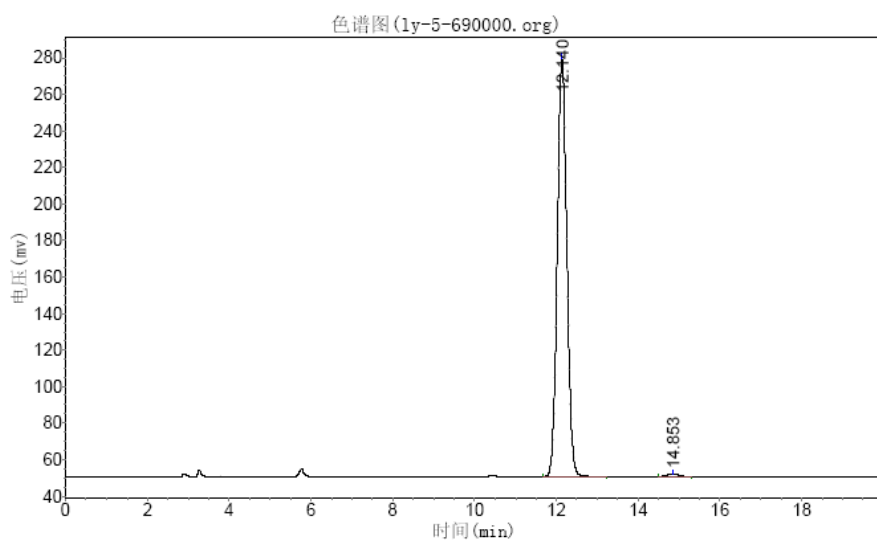

分析结果表

| 峰号 | 峰名 | 保留时间   | 峰高         | 峰面积         | 含量       |
|----|----|--------|------------|-------------|----------|
| 1  |    | 12.140 | 229353.297 | 3695632.000 | 99.3294  |
| 2  |    | 14.853 | 1277.580   | 24950.078   | 0.6706   |
| 总计 |    |        | 230630.876 | 3720582.078 | 100.0000 |

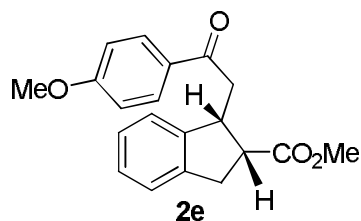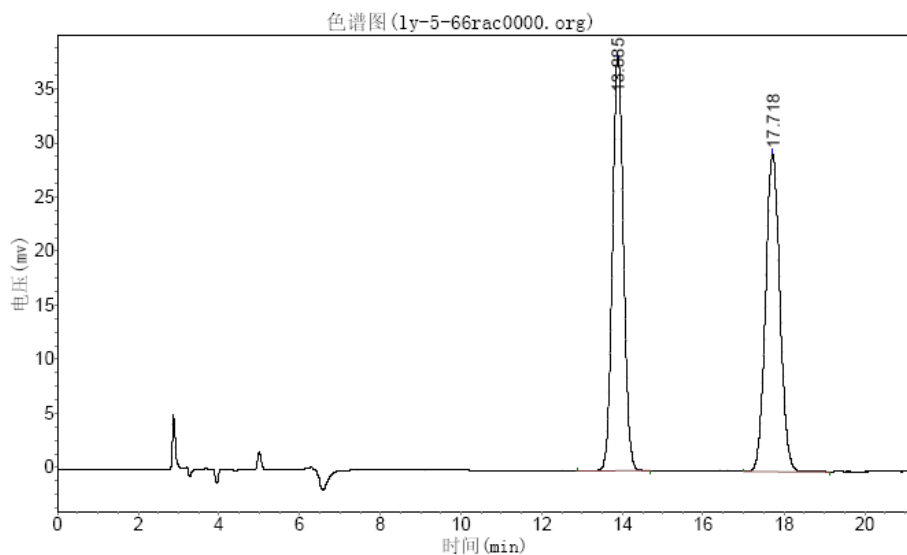

分析结果表

| 峰号 | 峰名 | 保留时间   | 峰高        | 峰面积         | 含量       |
|----|----|--------|-----------|-------------|----------|
| 1  |    | 13.885 | 38297.094 | 724208.188  | 49.9499  |
| 2  |    | 17.718 | 29400.814 | 725660.375  | 50.0501  |
| 总计 |    |        | 67697.908 | 1449868.563 | 100.0000 |

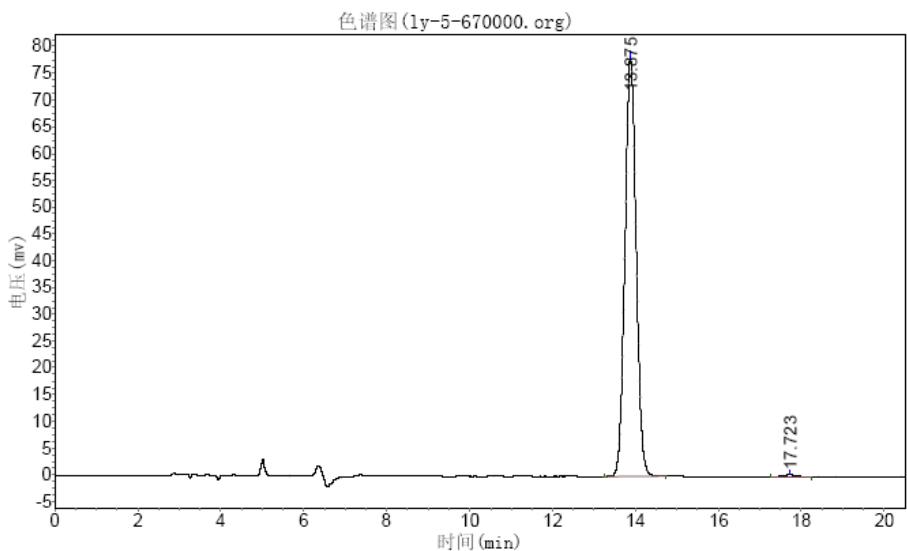

分析结果表

| 峰号 | 峰名 | 保留时间   | 峰高        | 峰面积         | 含量       |
|----|----|--------|-----------|-------------|----------|
| 1  |    | 13.875 | 78571.578 | 1479028.125 | 99.4464  |
| 2  |    | 17.723 | 344.052   | 8234.000    | 0.5536   |
| 总计 |    |        | 78915.631 | 1487262.125 | 100.0000 |

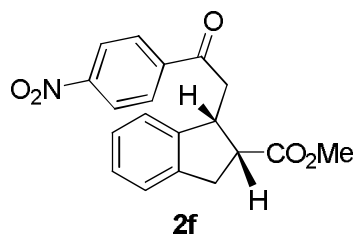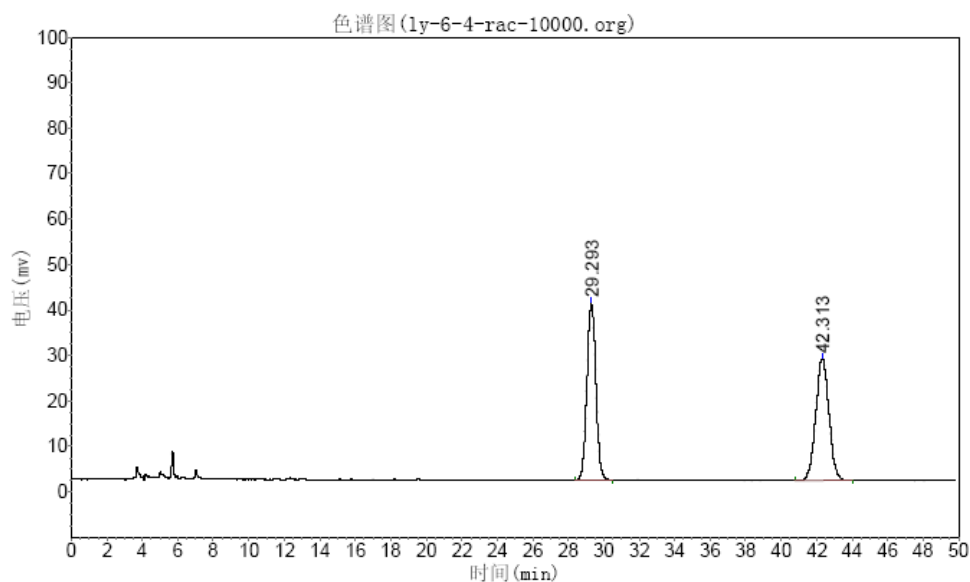

分析结果表

| 峰号 | 峰名 | 保留时间   | 峰高        | 峰面积         | 含量       |
|----|----|--------|-----------|-------------|----------|
| 1  |    | 29.293 | 39012.363 | 1379360.750 | 50.0058  |
| 2  |    | 42.313 | 26780.814 | 1379043.250 | 49.9942  |
| 总计 |    |        | 65793.178 | 2758404.000 | 100.0000 |

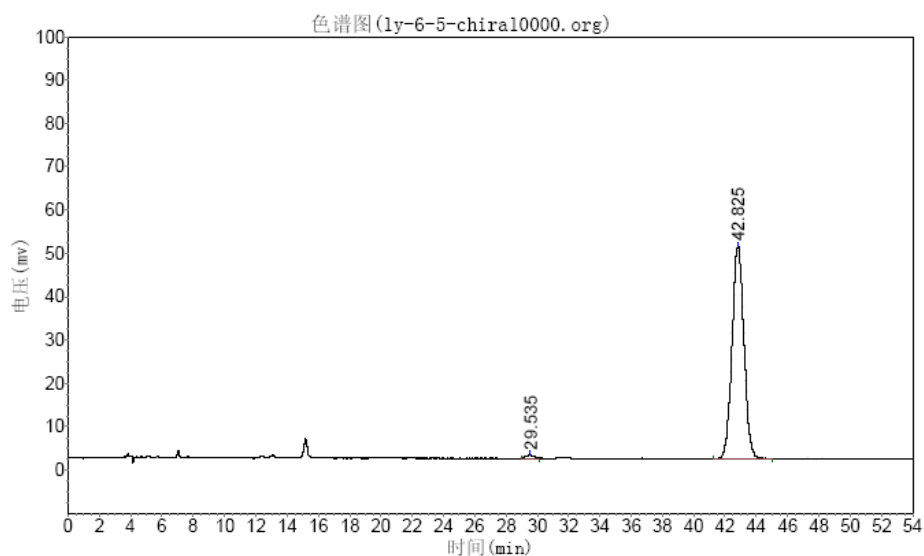

分析结果表

| 峰号 | 峰名 | 保留时间   | 峰高        | 峰面积         | 含量       |
|----|----|--------|-----------|-------------|----------|
| 1  |    | 29.535 | 745.546   | 24381.398   | 0.9362   |
| 2  |    | 42.825 | 48885.266 | 2579841.500 | 99.0638  |
| 总计 |    |        | 49630.812 | 2604222.898 | 100.0000 |



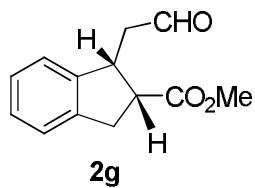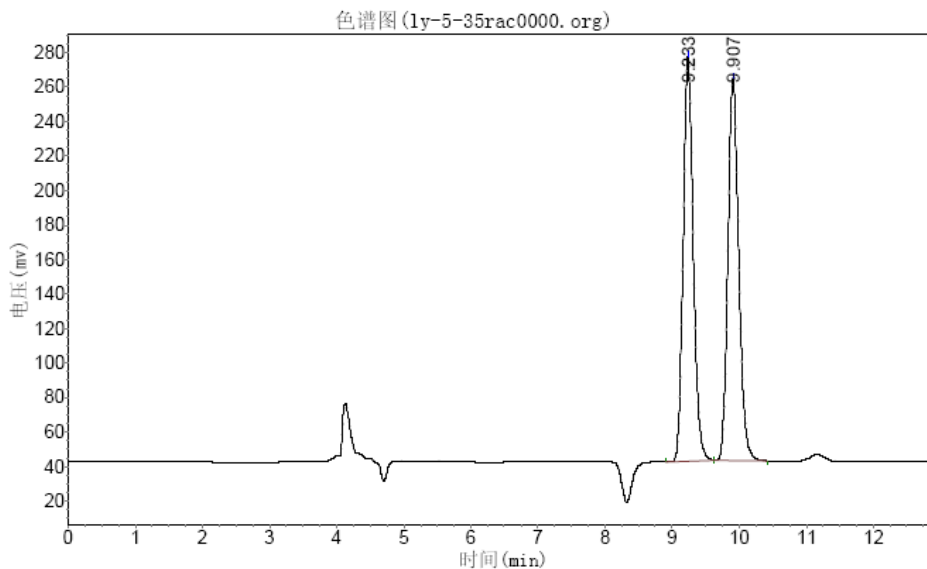

分析结果表

| 峰号 | 峰名 | 保留时间  | 峰高         | 峰面积         | 含量       |
|----|----|-------|------------|-------------|----------|
| 1  |    | 9.233 | 235027.594 | 2468364.500 | 49.9859  |
| 2  |    | 9.907 | 221924.031 | 2469755.250 | 50.0141  |
| 总计 |    |       | 456951.625 | 4938119.750 | 100.0000 |

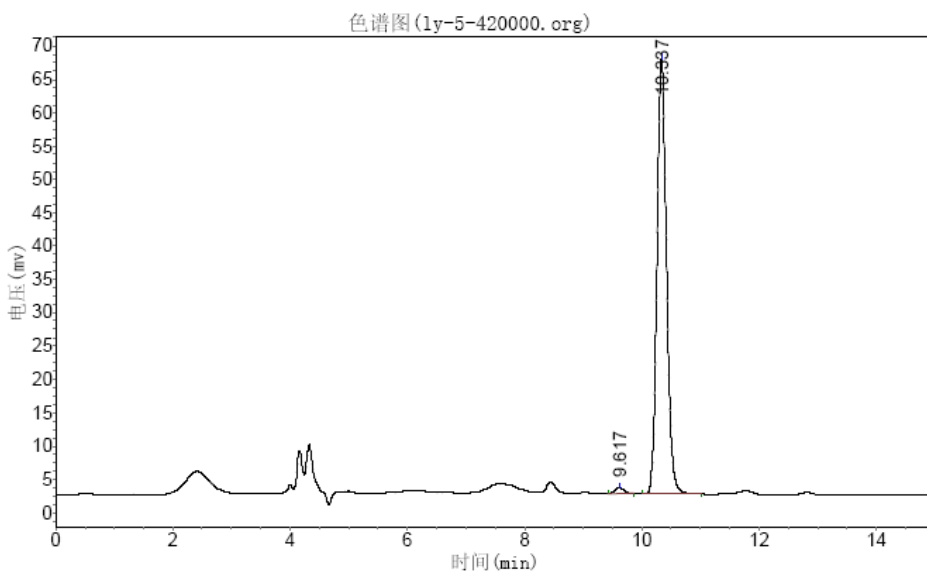

分析结果表

| 峰号 | 峰名 | 保留时间   | 峰高        | 峰面积        | 含量       |
|----|----|--------|-----------|------------|----------|
| 1  |    | 9.617  | 916.102   | 9221.451   | 1.2429   |
| 2  |    | 10.337 | 65304.445 | 732703.625 | 98.7571  |
| 总计 |    |        | 66220.547 | 741925.076 | 100.0000 |

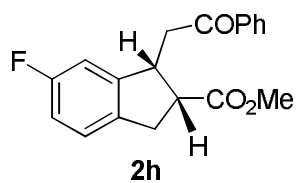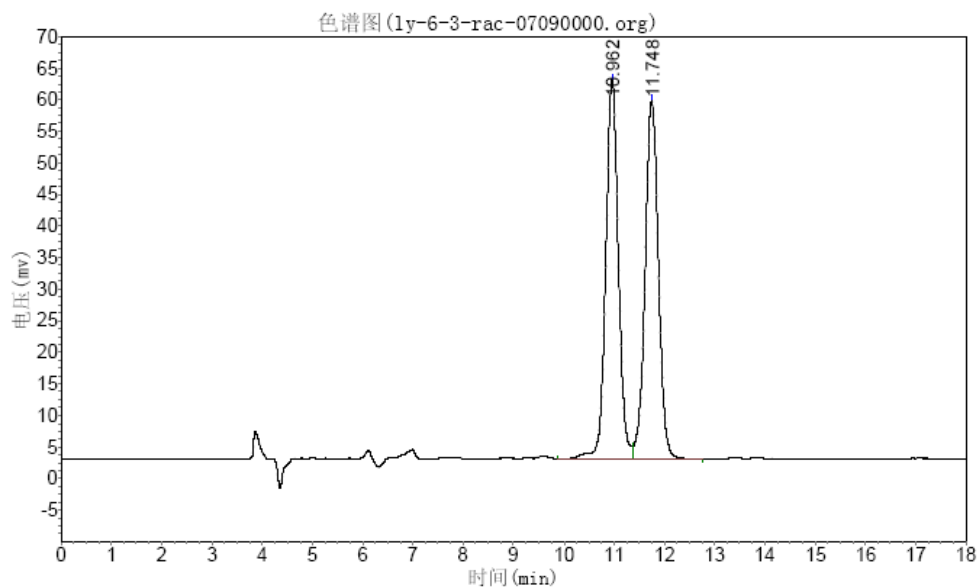

分析结果表

| 峰号 | 峰名 | 保留时间   | 峰高         | 峰面积         | 含量       |
|----|----|--------|------------|-------------|----------|
| 1  |    | 10.962 | 60153.574  | 1045236.125 | 50.1799  |
| 2  |    | 11.748 | 56884.297  | 1037743.500 | 49.8201  |
| 总计 |    |        | 117037.871 | 2082979.625 | 100.0000 |

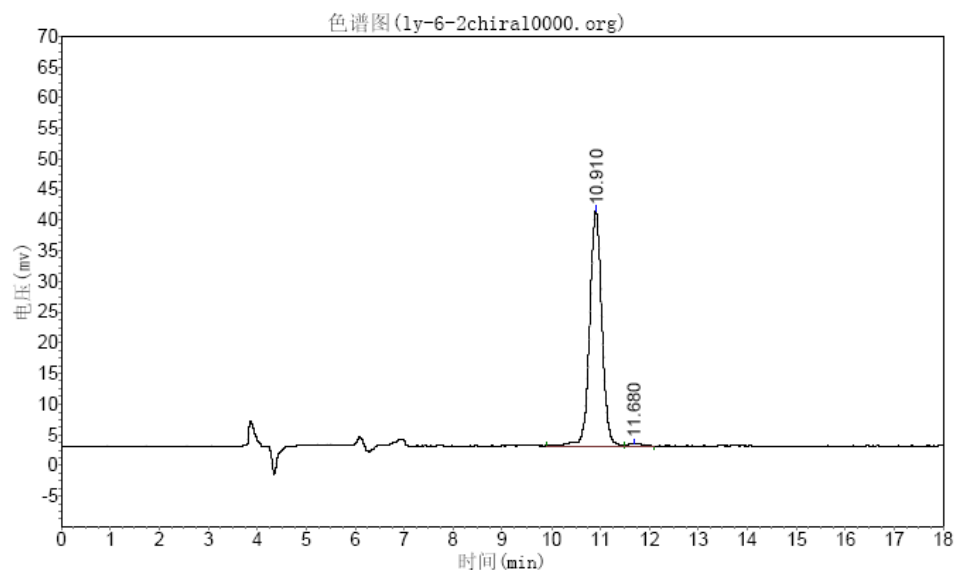

分析结果表

| 峰号 | 峰名 | 保留时间   | 峰高        | 峰面积        | 含量       |
|----|----|--------|-----------|------------|----------|
| 1  |    | 10.910 | 38292.551 | 655085.625 | 98.9887  |
| 2  |    | 11.680 | 333.082   | 6692.795   | 1.0113   |
| 总计 |    |        | 38625.632 | 661778.420 | 100.0000 |

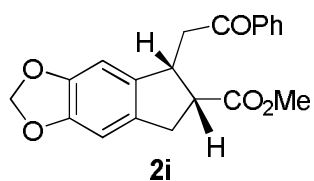

色谱图(ly-5-100-rac-AD0000.org)

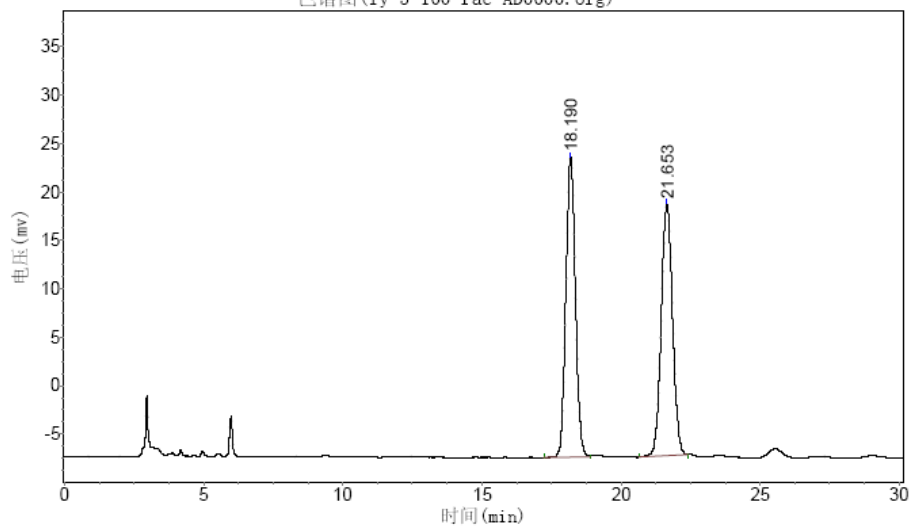

分析结果表

| 峰号 | 峰名 | 保留时间   | 峰高        | 峰面积         | 含量       |
|----|----|--------|-----------|-------------|----------|
| 1  |    | 18.190 | 31043.316 | 737097.813  | 49.8967  |
| 2  |    | 21.653 | 26021.428 | 740150.000  | 50.1033  |
| 总计 |    |        | 57064.744 | 1477247.813 | 100.0000 |

色谱图(ly-6-10000.org)

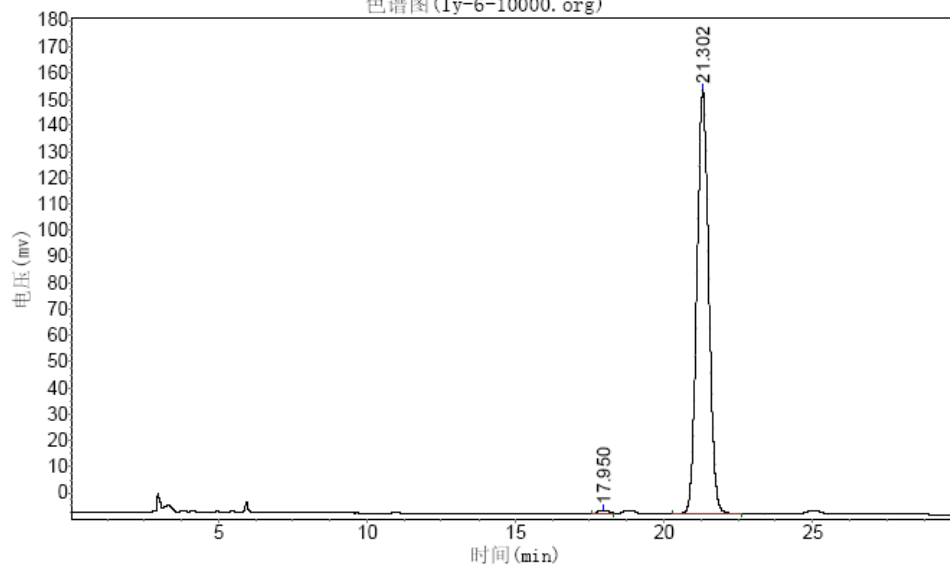

分析结果表

| 峰号 | 峰名 | 保留时间   | 峰高         | 峰面积         | 含量       |
|----|----|--------|------------|-------------|----------|
| 1  |    | 17.950 | 1238.301   | 26040.285   | 0.5735   |
| 2  |    | 21.302 | 161824.609 | 4514940.500 | 99.4266  |
| 总计 |    |        | 163062.911 | 4540980.785 | 100.0000 |

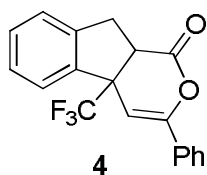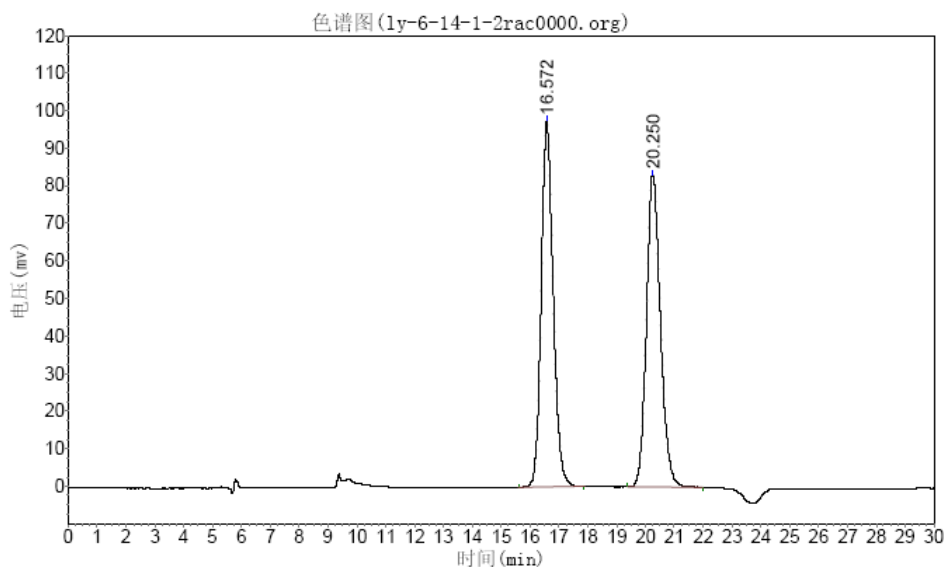

分析结果表

| 峰号 | 峰名 | 保留时间   | 峰高         | 峰面积         | 含量       |
|----|----|--------|------------|-------------|----------|
| 1  |    | 16.572 | 97502.891  | 2810401.500 | 49.9252  |
| 2  |    | 20.250 | 83126.211  | 2818823.750 | 50.0748  |
| 总计 |    |        | 180629.102 | 5629225.250 | 100.0000 |

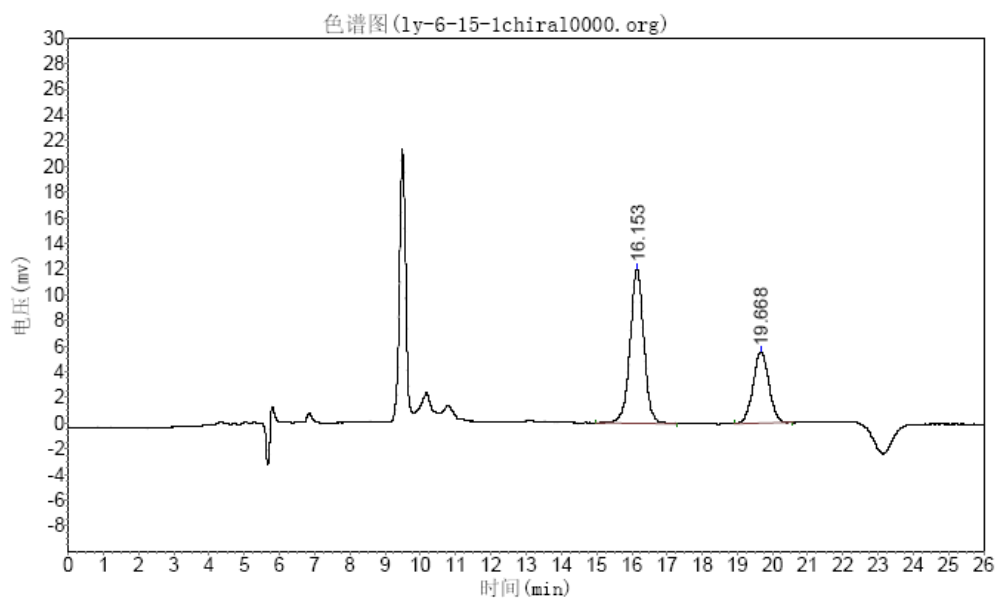

分析结果表

| 峰号 | 峰名 | 保留时间   | 峰高        | 峰面积        | 含量       |
|----|----|--------|-----------|------------|----------|
| 1  |    | 16.153 | 12064.179 | 329533.688 | 65.4523  |
| 2  |    | 19.668 | 5566.382  | 173937.531 | 34.5477  |
| 总计 |    |        | 17630.561 | 503471.219 | 100.0000 |

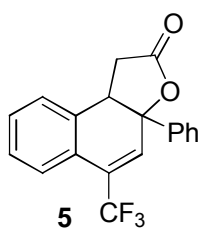

色谱图(1y-6-14-2rac0000.org)

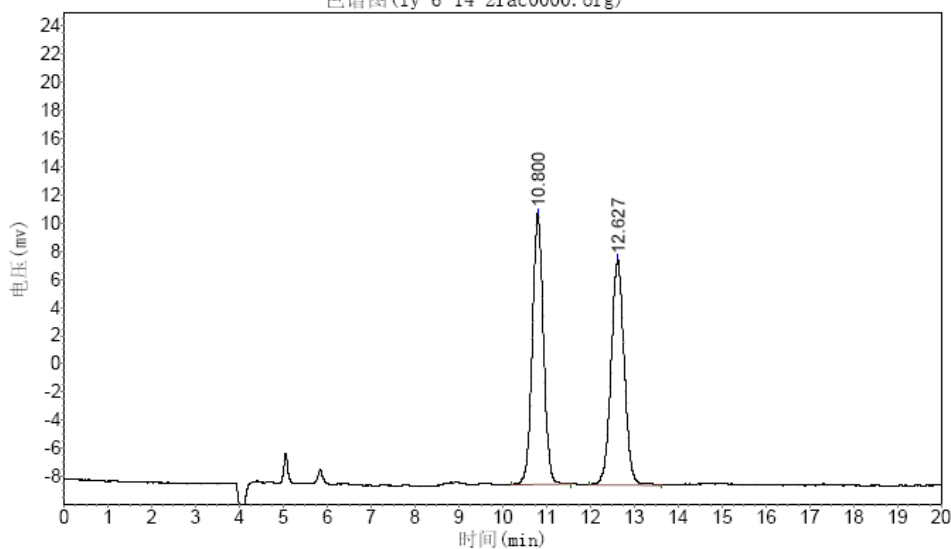

分析结果表

| 峰号 | 峰名 | 保留时间   | 峰高        | 峰面积        | 含量       |
|----|----|--------|-----------|------------|----------|
| 1  |    | 10.800 | 19277.170 | 339957.063 | 50.3245  |
| 2  |    | 12.627 | 16030.122 | 335572.344 | 49.6755  |
| 总计 |    |        | 35307.292 | 675529.406 | 100.0000 |

色谱图(1y-6-15-20000.org)

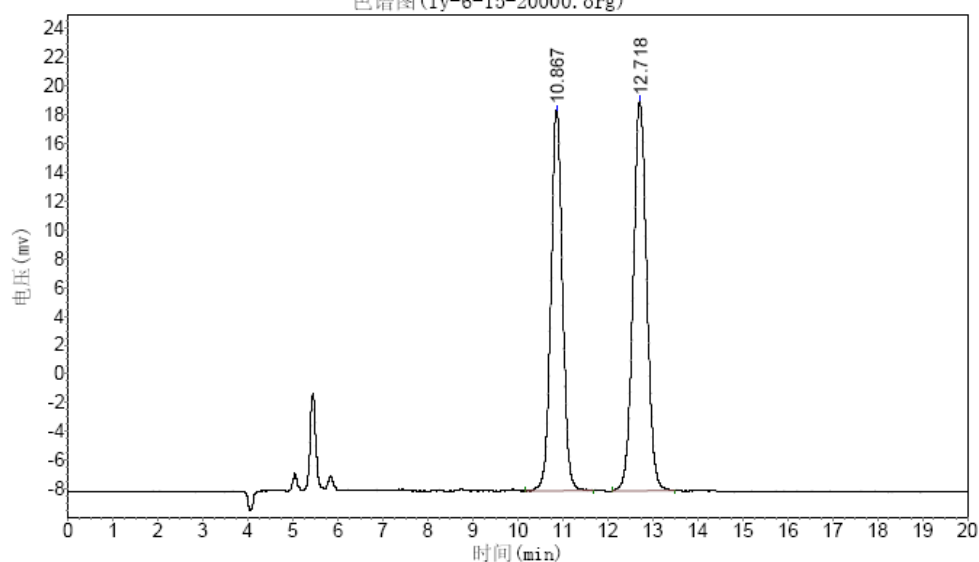

分析结果表

| 峰号 | 峰名 | 保留时间   | 峰高        | 峰面积         | 含量       |
|----|----|--------|-----------|-------------|----------|
| 1  |    | 10.867 | 26448.898 | 471398.406  | 45.2570  |
| 2  |    | 12.718 | 27123.094 | 570204.188  | 54.7430  |
| 总计 |    |        | 53571.992 | 1041602.594 | 100.0000 |

### X-ray structure of **3**

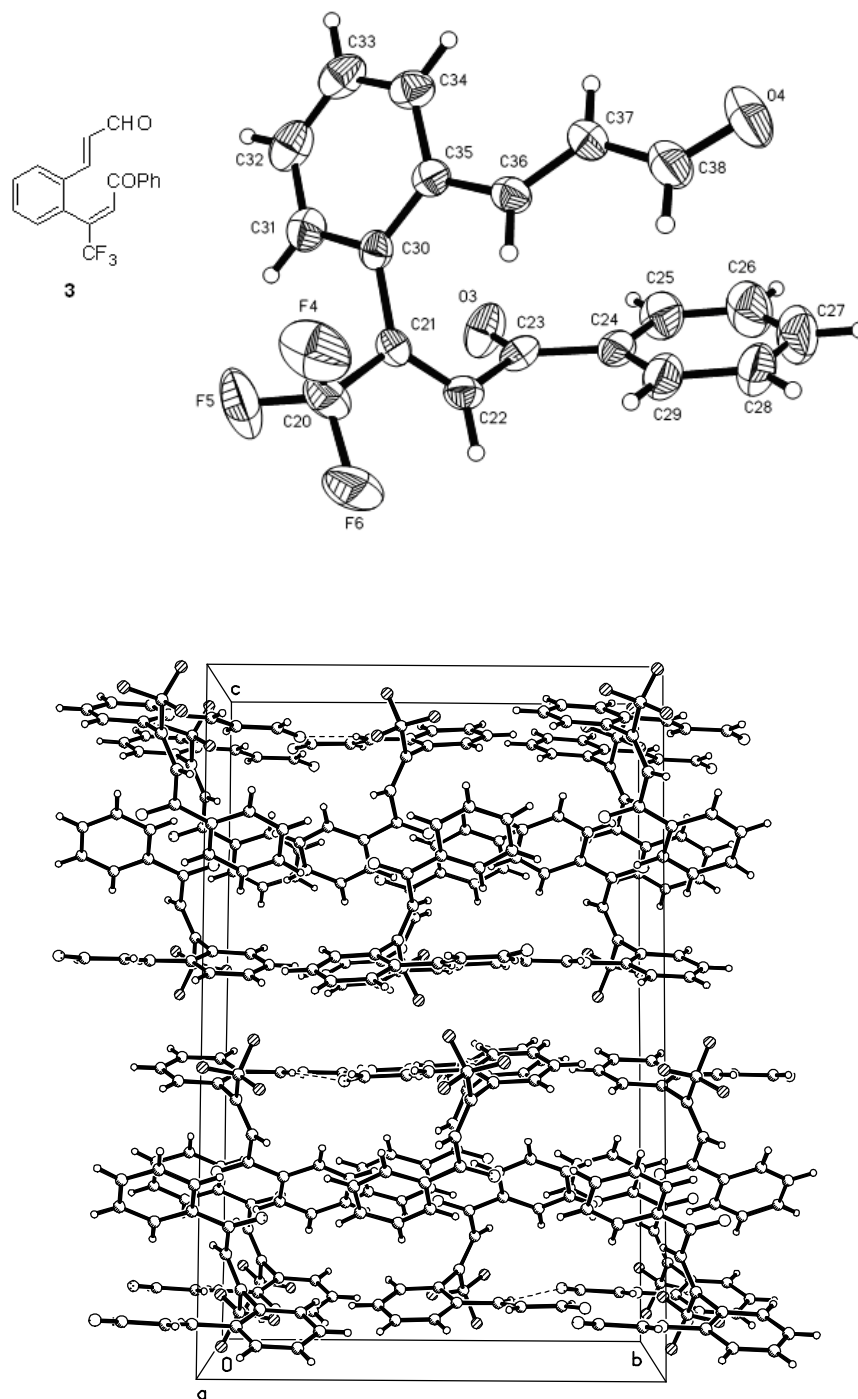

Table 1. Crystal data and structure refinement for **3**.

|                     |                                                  |
|---------------------|--------------------------------------------------|
| Identification code | cd28459                                          |
| Empirical formula   | $\text{C}_{19}\text{H}_{13}\text{F}_3\text{O}_2$ |
| Formula weight      | 330.29                                           |
| Temperature         | 293(2) K                                         |
| Wavelength          | 0.71073 Å                                        |

|                                   |                                                                                                                         |
|-----------------------------------|-------------------------------------------------------------------------------------------------------------------------|
| Crystal system, space group       | Monoclinic, P2(1)/c                                                                                                     |
| Unit cell dimensions              | a = 8.9074(11) Å $\alpha$ = 90 deg.<br>b = 15.5638(19) Å $\beta$ = 95.334(2) deg.<br>c = 24.123(3) Å $\gamma$ = 90 deg. |
| Volume                            | 3329.7(7) Å <sup>3</sup>                                                                                                |
| Z, Calculated density             | 8, 1.318 Mg/m <sup>3</sup>                                                                                              |
| Absorption coefficient            | 0.107 mm <sup>-1</sup>                                                                                                  |
| F(000)                            | 1360                                                                                                                    |
| Crystal size                      | 0.403 x 0.352 x 0.278 mm                                                                                                |
| Theta range for data collection   | 1.56 to 25.50 deg.                                                                                                      |
| Limiting indices                  | -7<=h<=10, -18<=k<=18, -29<=l<=29                                                                                       |
| Reflections collected / unique    | 17167 / 6205 [R(int) = 0.0551]                                                                                          |
| Completeness to theta = 25.50     | 100.0 %                                                                                                                 |
| Absorption correction             | Empirical                                                                                                               |
| Max. and min. transmission        | 1.0000 and 0.7964                                                                                                       |
| Refinement method                 | Full-matrix least-squares on F <sup>2</sup>                                                                             |
| Data / restraints / parameters    | 6205 / 0 / 433                                                                                                          |
| Goodness-of-fit on F <sup>2</sup> | 1.033                                                                                                                   |
| Final R indices [I>2sigma(I)]     | R1 = 0.0815, wR2 = 0.1924                                                                                               |
| R indices (all data)              | R1 = 0.1676, wR2 = 0.2309                                                                                               |
| Largest diff. peak and hole       | 0.211 and -0.200 e. Å <sup>-3</sup>                                                                                     |
